# Supplementary material for: Towards high-level theoretical studies of large biodiesel molecules: an ONIOM [QCISD(T)/CBS:DFT] study of hydrogen abstraction reactions of CnH2n+1COOCmH2m+1 + H
Source: Royal Society of Chemistry journal article supplement (doi:10.1039/c4cp03004d), 2014-10-24
Supplement: c4cp03004d1.pdf [file c4cp03004d1.pdf]

Toward High-level Theoretical Studies of Large Biodiesel  
Molecules: An ONIOM [QCISD(T)/CBS:DFT] Study of Hydrogen  
Abstraction Reactions of  $C_nH_{2n+1}COOC_mH_{2m+1} + H$

Lidong Zhang and Peng Zhang\*

*Department of Mechanical Engineering, The Hong Kong Polytechnic University, Kowloon, Hong Kong*

---

\* Corresponding author.  
E-mail: pengzhang.zhang@polyu.edu.hk  
Fax: (852)23654703 , Tel: (852)27666664.

## Table of Contents

|                                                                                                                   |    |
|-------------------------------------------------------------------------------------------------------------------|----|
| Table S1 .....                                                                                                    | 3  |
| Table S2 .....                                                                                                    | 5  |
| Figure S1 .....                                                                                                   | 7  |
| Figure S2 .....                                                                                                   | 8  |
| The optimized geometries at B3LYP/6-311++G(d,p) level. ....                                                       | 9  |
| HCOOCH <sub>3</sub> (n=0,m=1) .....                                                                               | 9  |
| HCOOCHCH <sub>3</sub> (n=0,m=2).....                                                                              | 10 |
| CH <sub>3</sub> COOCH <sub>3</sub> (n=1,m=1).....                                                                 | 12 |
| CH <sub>3</sub> COOCH <sub>2</sub> CH <sub>3</sub> (n=1,m=2).....                                                 | 14 |
| CH <sub>3</sub> CH <sub>2</sub> COOCH <sub>3</sub> (n=2,m=1).....                                                 | 18 |
| CH <sub>3</sub> CH <sub>2</sub> COOCH <sub>2</sub> CH <sub>3</sub> (n=2,m=2).....                                 | 22 |
| CH <sub>3</sub> CH <sub>2</sub> CH <sub>2</sub> COOCH <sub>3</sub> (n=3,m=1).....                                 | 27 |
| CH <sub>3</sub> CH <sub>2</sub> CH <sub>2</sub> COOCH <sub>2</sub> CH <sub>3</sub> (n=3,m=2).....                 | 32 |
| CH <sub>3</sub> CH <sub>2</sub> CH <sub>2</sub> CH <sub>2</sub> COOCH <sub>3</sub> (n=4,m=1).....                 | 38 |
| CH <sub>3</sub> CH <sub>2</sub> CH <sub>2</sub> CH <sub>2</sub> COOCH <sub>2</sub> CH <sub>3</sub> (n=4,m=2)..... | 44 |
| CH <sub>3</sub> CH <sub>2</sub> CH <sub>2</sub> CH <sub>2</sub> CH <sub>2</sub> COOCH <sub>3</sub> (n=5,m=1)..... | 57 |
| C <sub>9</sub> H <sub>22</sub> .....                                                                              | 70 |
| CH <sub>3</sub> (CH <sub>2</sub> ) <sub>8</sub> COOCH <sub>3</sub> (n=9,m=1).....                                 | 73 |
| CH <sub>3</sub> (CH <sub>2</sub> ) <sub>14</sub> COOCH <sub>3</sub> (n=15,m=1).....                               | 95 |

| Method                                | MF       |       | MA       |       | MB       |       |           |        |          |       |           |       |
|---------------------------------------|----------|-------|----------|-------|----------|-------|-----------|--------|----------|-------|-----------|-------|
|                                       | $\alpha$ |       | $\alpha$ |       | $\alpha$ |       | $\alpha'$ |        | $\beta'$ |       | $\gamma'$ |       |
|                                       | EB       | HR    | EB       | HR    | EB       | HR    | EB        | HR     | EB       | HR    | EB        | HR    |
| [QCISD(T)/CBS] <sub>1</sub>           | 11.02    | -4.83 | 10.60    | -5.27 |          |       |           |        |          |       |           |       |
| [QCISD(T)/CBS] <sub>2</sub>           | 10.94    | -4.93 | 10.52    | -5.37 | 10.37    | -5.52 | 7.10      | -10.19 | 8.29     | -6.00 | 10.20     | -3.49 |
| ONIOM                                 |          |       | 10.54    | -5.29 | 10.40    | -5.45 | 7.14      | -10.16 | 8.26     | -6.05 | 10.22     | -3.55 |
| Experiment <sup>1</sup>               | 12.90    |       |          |       | 10.32    | -5.54 | 6.97      | -10.38 | 8.10     | -6.16 | 10.09     | -3.63 |
| QCISD(T)/6-311++G(2d,2p) <sup>2</sup> | 11.60    | -4.20 |          |       | 10.32    | -5.10 | 7.30      | -9.83  | 8.24     | -5.70 | 10.15     | -3.38 |
| MRSDCI+DS/CBS <sup>a,3</sup>          | 12.10    | -3.30 |          |       |          |       |           |        |          |       |           |       |
| MRACPF/CBS <sup>b,3</sup>             | 12.00    | -3.50 |          |       |          |       |           |        |          |       |           |       |
| CCSD(T)/CBS <sup>4</sup>              |          |       | 10.53    | -4.96 |          |       |           |        |          |       |           |       |
| CCSD(T)/CBS <sup>a,5</sup>            |          |       |          |       | 10.32    | -5.54 | 6.97      | -10.38 | 8.10     | -6.16 | 10.09     | -3.63 |
| CCSD(T)/CBS <sup>b,5</sup>            |          |       |          |       | 10.32    | -5.10 | 7.30      | -9.83  | 8.24     | -5.70 | 10.15     | -3.38 |

**Table S1: Comparison of Energy Barriers for Hydrogen Abstraction Reactions of MF+H, MA+H and MB+H. (Unit : kcal/mol)**

<sup>2</sup> QCISD(T)/6-311++G(2d,2p)//MP2/6-311++G(2d,dp),

<sup>a,3</sup> MRSDCI+DS/CBS//B3LYP/cc-pVTZ,

<sup>b,3</sup> MRACPF/CBS//B3LYP/cc-pVTZ,

<sup>4</sup> CCSD(T)/CBS//MP2/aug-cc-pVTZ,

<sup>a,5</sup> CCSD(T)/CBS//B3LYP/6-311++G(d,p),

<sup>b,5</sup> CCSD(T)/CBS//MP2/cc-pVTZ.

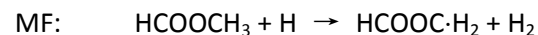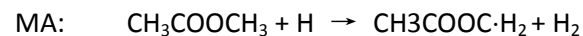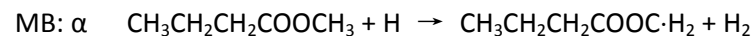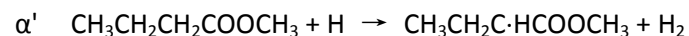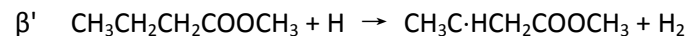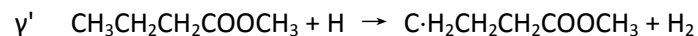

1. S. Dooley, M. Burke, M. Chaos, Y. Stein, F. Dryer, V. P. Zhukov, O. Finch, J. Simmie and H. Curran, *Int J Chem Kinet*, 2010, **42**, 527-549.
2. D. A. Good and J. S. Francisco, *The Journal of Physical Chemistry A*, 2002, **106**, 1733-1738.
3. T. Tan, M. Pavone, D. B. Krisiloff and E. A. Carter, *The Journal of Physical Chemistry A*, 2012, **116**, 8431-8443.
4. S. L. Peukert, R. Sivaramakrishnan, M.-C. Su and J. V. Michael, *Combust Flame*, 2012, **159**, 2312-2323.
5. W. Liu, R. Sivaramakrishnan, M. J. Davis, S. Som, D. Longman and T. Lu, *Proceedings of the Combustion Institute*, 2013, **34**, 401-409.

| Reactions                                                                                                                                                             |                                                                       | 1     | 2    | 3    | 4   | 5   |
|-----------------------------------------------------------------------------------------------------------------------------------------------------------------------|-----------------------------------------------------------------------|-------|------|------|-----|-----|
| $\text{H} + \text{CH}_3(\text{CH}_2)_{14}\text{COOCH}_3$<br>$\rightarrow \text{H}_2 + \text{CH}_3(\text{CH}_2)_{11}\text{CH}(\text{CH}_2)_2\text{COOCH}_3$<br>(ONIOM) | $\text{CH}_3(\text{CH}_2)_{14}\text{COOCH}_3$                         | 929   | 114  | 455  | 232 | 57  |
|                                                                                                                                                                       | $\text{CH}_3(\text{CH}_2)_{11}\text{CH}(\text{CH}_2)_2\text{COOCH}_3$ | 1803  | 202  | 701  | 440 | 97  |
|                                                                                                                                                                       | TS                                                                    | 3085  | 264  | 935  | 441 | 109 |
| $\text{H} + \text{CH}_3(\text{CH}_2)_8\text{COOCH}_3$<br>$\rightarrow \text{H}_2 + \text{CH}_3(\text{CH}_2)_5\text{CH}(\text{CH}_2)_2\text{COOCH}_3$<br>(ONIOM)       | $\text{CH}_3(\text{CH}_2)_8\text{COOCH}_3$                            | 1335  | 93   | 455  | 87  | 51  |
|                                                                                                                                                                       | $\text{CH}_3(\text{CH}_2)_5\text{CH}(\text{CH}_2)_2\text{COOCH}_3$    | 2558  | 180  | 753  | 151 | 86  |
|                                                                                                                                                                       | TS                                                                    | 5757  | 236  | 1090 | 166 | 103 |
| $\text{H} + \text{CH}_3(\text{CH}_2)_4\text{COOCH}_3$<br>$\rightarrow \text{H}_2 + \text{CH}_3\text{CH}_2\text{CH}(\text{CH}_2)_2\text{COOCH}_3$                      | ONIOM                                                                 |       |      |      |     |     |
|                                                                                                                                                                       | $\text{CH}_3(\text{CH}_2)_4\text{COOCH}_3$                            | 890   | 105  | 462  | 71  | 34  |
|                                                                                                                                                                       | $\text{CH}_3\text{CH}_2\text{CH}(\text{CH}_2)_2\text{COOCH}_3$        | 2466  | 226  | 940  | 110 | 52  |
|                                                                                                                                                                       | TS                                                                    | 7254  | 304  | 1388 | 151 | 66  |
|                                                                                                                                                                       | Full QCISD(T)/CBS                                                     |       |      |      |     |     |
|                                                                                                                                                                       | $\text{CH}_3(\text{CH}_2)_4\text{COOCH}_3$                            | 21241 | 692  | 1211 | 116 | 9   |
|                                                                                                                                                                       | $\text{CH}_3\text{CH}_2\text{CH}(\text{CH}_2)_2\text{COOCH}_3$        | 25144 | 1646 | 2183 | 208 | 20  |
|                                                                                                                                                                       | TS                                                                    | 38223 | 2089 | 3291 | 250 | 25  |

Table S2: Comparison of computation times with the ONIOM and QCISD(T)/CBS methods. (Unit : minutes)

**2x 6 core CPU Intel(R) Xeon(R) CPU E5-2620 0 @ 2.00GHz**

1: QCISD(T)/CC-PVTZ

2: QCISD(T)/CC-PVDZ

3: MP2/CC-PVQZ

4: MP2/CC-PVTZ

5: MP2/CC-PVDZ

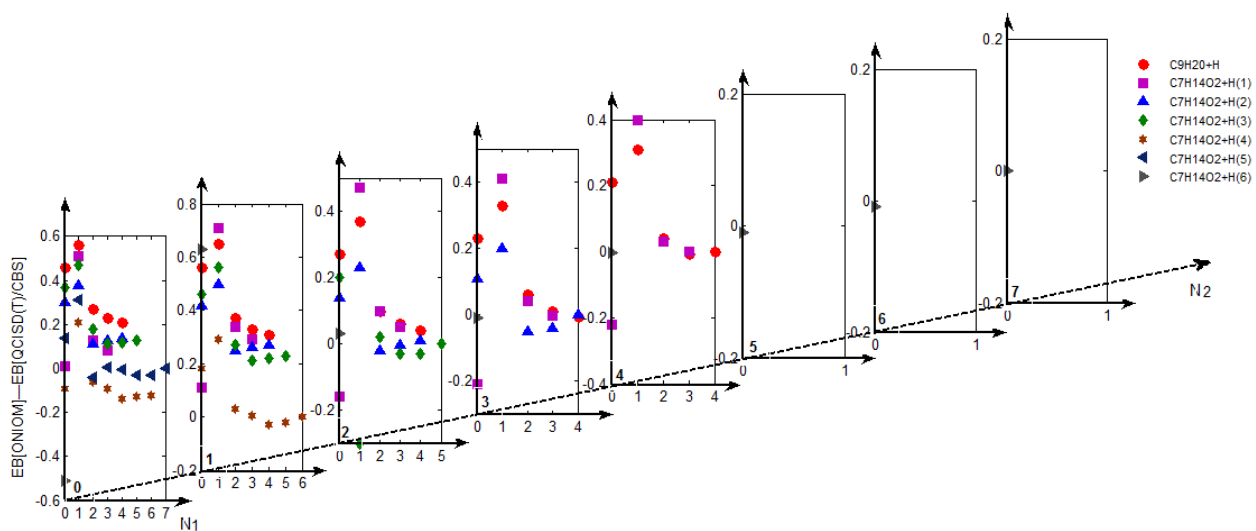

(a)

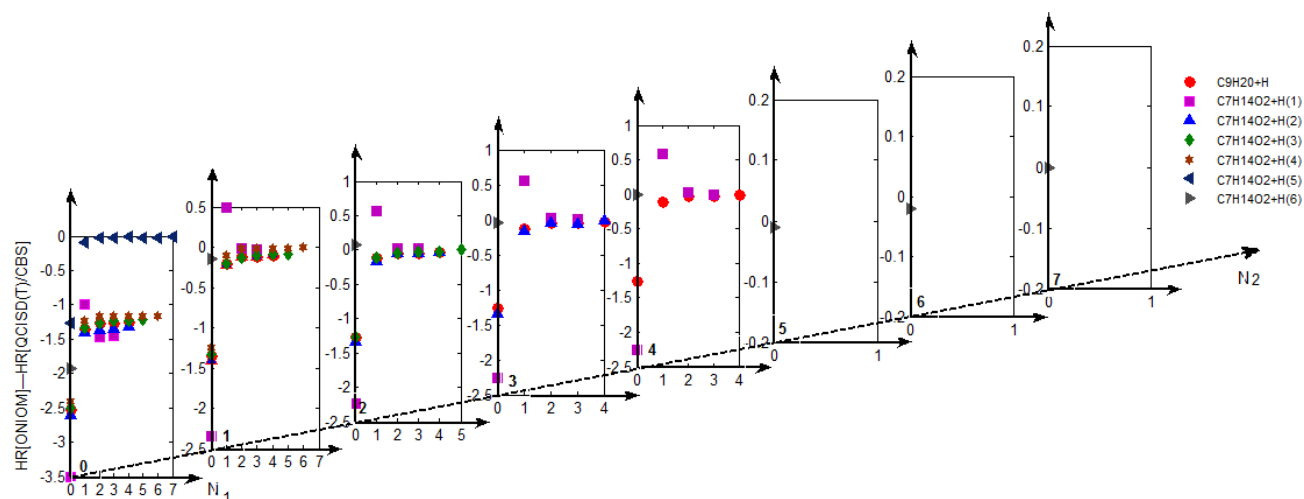

(b)

**Figure S1** (a) Variation of the difference of the calculated energy barriers,  $EB[ONIOM/CAP(N_1, N_2)] - EB[QCISD(T)/CBS]$ , with  $N_1$  and  $N_2$ , (b) Variation of the difference of the calculated heat of reaction,  $HR[ONIOM/CAP(N_1, N_2)] - HR[QCISD(T)/CBS]$  with  $N_1$  and  $N_2$ , for the five reactions including  $C_9H_{20} + H \rightarrow C_4H_9C-HC_4H_9 + H_2$ ,  $C_7H_{14}O_2 + H \rightarrow C_4H_9C-HCOOCH_3 + H_2$  (1),  $C_3H_7C-HCH_2COOCH_3 + H_2$  (2),  $C_2H_5C-H(CH_2)_2COOCH_3 + H_2$  (3),  $CH_3C-H(CH_2)_3COOCH_3 + H_2$  (4),  $C-H_2(CH_2)_4COOCH_3 + H_2$  (5), and  $CH_3(CH_2)_4COOCH_3 + H_2$  (6). Each two-dimensional plane represents a constant  $N_2$  plane ( $N_2=0-7$  from left to right).

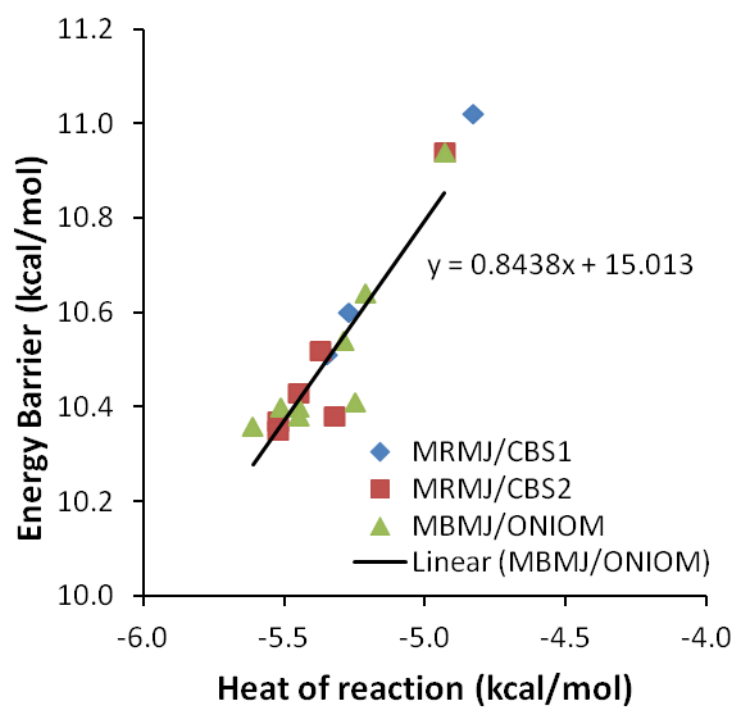

Figure S2. Evans-Polanyi Plot for the reactions  $C_nH_{2n+1}COOCH_3 + H \rightarrow C_nH_{2n+1}COOC\cdot H_2 + H_2$ .



## The optimized geometries at B3LYP/6-311++G(d,p) level.

**HCOOCH<sub>3</sub>(n=0,m=1)**

**H + HCOOCH<sub>3</sub> → H<sub>2</sub> + HCOOCH<sub>2</sub> (TS2-1)**

**HCOOCH<sub>3</sub>**

|   |         |         |         |
|---|---------|---------|---------|
| C | -0.9459 | -3.8721 | -0.7334 |
| O | -0.3140 | -4.9791 | -0.3217 |
| O | -1.9305 | -3.8381 | -1.4212 |
| C | -0.8832 | -6.2335 | -0.7544 |
| H | -1.9039 | -6.3333 | -0.3833 |
| H | -0.8878 | -6.2909 | -1.8434 |
| H | -0.2426 | -7.0029 | -0.3308 |
| H | -0.4193 | -2.9913 | -0.3409 |

**HCOOCH<sub>2</sub>**

|   |         |         |         |
|---|---------|---------|---------|
| C | -0.6673 | -3.8097 | -0.9831 |
| O | -0.0301 | -4.9391 | -0.5615 |
| O | -1.5892 | -3.7814 | -1.7465 |
| C | -0.4540 | -6.1486 | -1.0292 |
| H | -1.2796 | -6.1835 | -1.7211 |
| H | 0.1030  | -6.9858 | -0.6459 |
| H | -0.1924 | -2.9459 | -0.5059 |

**TS1-1**

|   |         |         |         |
|---|---------|---------|---------|
| C | -0.7162 | -3.8233 | -0.9187 |
| O | -0.0844 | -4.9423 | -0.4905 |
| O | -1.6737 | -3.7953 | -1.6377 |
| C | -0.6071 | -6.1790 | -0.8976 |
| H | -1.6071 | -6.4954 | -0.0798 |
| H | -1.0642 | -6.1605 | -1.8840 |
| H | 0.1405  | -6.9476 | -0.7295 |
| H | -2.3154 | -6.6954 | 0.5286  |
| H | -0.1998 | -2.9494 | -0.5035 |

---

**HCOOCHCH<sub>3</sub>(n=0,m=2)**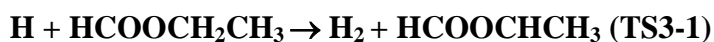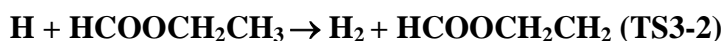**HCOOCH<sub>2</sub>CH<sub>3</sub>**

|   |         |         |         |
|---|---------|---------|---------|
| C | -0.9272 | -3.8912 | -0.7215 |
| O | -0.2940 | -4.9952 | -0.3068 |
| O | -1.9101 | -3.8568 | -1.4128 |
| C | -0.8527 | -6.2677 | -0.7365 |
| H | -1.8843 | -6.3277 | -0.3828 |
| H | -0.8702 | -6.2848 | -1.8284 |
| C | 0.0146  | -7.3668 | -0.1606 |
| H | 0.0252  | -7.3268 | 0.9308  |
| H | -0.3784 | -8.3406 | -0.4646 |
| H | 1.0425  | -7.2845 | -0.5204 |
| H | -0.4047 | -3.0075 | -0.3283 |

**HCOOCHCH<sub>3</sub>**

|   |         |         |         |
|---|---------|---------|---------|
| C | -0.9881 | -3.8545 | -0.4127 |
| O | -0.3110 | -4.9806 | -0.0657 |
| O | -2.0662 | -3.8241 | -0.9367 |
| C | -0.8650 | -6.2105 | -0.3405 |
| H | -1.8821 | -6.2113 | -0.7032 |
| C | -0.1327 | -7.3699 | 0.2111  |
| H | -0.1786 | -7.4055 | 1.3105  |
| H | -0.5624 | -8.2980 | -0.1702 |
| H | 0.9278  | -7.3407 | -0.0625 |
| H | -0.3828 | -2.9849 | -0.1330 |

**TS3-1**

|   |         |         |         |
|---|---------|---------|---------|
| C | -0.9758 | -3.8707 | -0.4153 |
| O | -0.2715 | -4.9907 | -0.1390 |
| O | -2.0517 | -3.8298 | -0.9422 |
| C | -0.8269 | -6.2359 | -0.5242 |
| H | -1.9150 | -6.2233 | -0.4726 |
| H | -0.5909 | -6.3645 | -1.7906 |
| C | -0.1299 | -7.3635 | 0.1808  |
| H | -0.3030 | -7.3159 | 1.2609  |
| H | -0.5122 | -8.3191 | -0.1858 |
| H | 0.9475  | -7.3298 | 0.0041  |
| H | -0.3574 | -6.4632 | -2.7473 |
| H | -0.4024 | -3.0013 | -0.0696 |

**HCOOCH<sub>2</sub>CH<sub>2</sub>**

|   |         |         |         |
|---|---------|---------|---------|
| C | -1.1827 | -3.9258 | -0.6169 |
| O | -0.5885 | -5.0433 | -0.1774 |
| O | -2.1423 | -3.8728 | -1.3384 |
| C | -1.1729 | -6.3011 | -0.6169 |
| H | -2.2433 | -6.2791 | -0.3651 |
| H | -1.1097 | -6.3609 | -1.7079 |
| C | -0.4566 | -7.4089 | 0.0474  |
| H | -0.0429 | -7.2747 | 1.0378  |
| H | -0.4626 | -8.3950 | -0.3971 |
| H | -0.6507 | -3.0540 | -0.2116 |

**TS3-2**

|   |         |         |         |
|---|---------|---------|---------|
| C | -1.1940 | -3.9206 | -0.6198 |
| O | -0.5777 | -5.0268 | -0.1792 |
| O | -2.1512 | -3.8889 | -1.3450 |
| C | -1.1247 | -6.2927 | -0.6305 |
| H | -2.1742 | -6.3466 | -0.3183 |
| H | -1.1075 | -6.3171 | -1.7232 |
| C | -0.3076 | -7.3905 | -0.0271 |
| H | -0.1216 | -7.3037 | 1.0414  |
| H | -0.6110 | -8.3896 | -0.3344 |
| H | 0.9565  | -7.2965 | -0.5684 |
| H | 1.7792  | -7.2295 | -0.9610 |
| H | -0.6826 | -3.0391 | -0.2098 |

**CH<sub>3</sub>COOCH<sub>3</sub>(n=1,m=1)**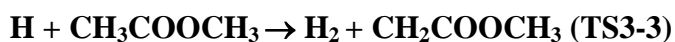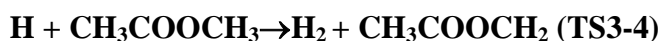**CH<sub>3</sub>COOCH<sub>3</sub>**

|   |         |         |         |
|---|---------|---------|---------|
| C | -0.1581 | -2.6600 | -0.1438 |
| H | -0.1596 | -2.6889 | 0.9484  |
| H | 0.8843  | -2.6707 | -0.4697 |
| C | -0.8828 | -3.8633 | -0.6892 |
| O | -0.2801 | -5.0095 | -0.2985 |
| O | -1.8707 | -3.8380 | -1.3812 |
| C | -0.8877 | -6.2315 | -0.7573 |
| H | -1.9112 | -6.3110 | -0.3881 |
| H | -0.8972 | -6.2675 | -1.8475 |
| H | -0.2717 | -7.0317 | -0.3529 |
| H | -0.6484 | -1.7529 | -0.4908 |

**CH<sub>2</sub>COOCH<sub>3</sub>**

|   |         |         |         |
|---|---------|---------|---------|
| C | 0.1322  | -2.6578 | -0.4998 |
| H | 1.1613  | -2.7382 | -0.1784 |
| C | -0.6395 | -3.8348 | -0.8292 |
| O | 0.0853  | -4.9751 | -0.6796 |
| O | -1.8004 | -3.8255 | -1.1978 |
| C | -0.6048 | -6.1975 | -0.9849 |
| H | -0.9316 | -6.2030 | -2.0263 |
| H | 0.1170  | -6.9914 | -0.8061 |
| H | -0.3477 | -1.6934 | -0.5831 |
| H | -1.4760 | -6.3172 | -0.3386 |

**TS3-3**

|   |         |         |         |
|---|---------|---------|---------|
| C | 0.0953  | -2.6529 | -0.3002 |
| H | -0.1093 | -2.5843 | 0.9806  |
| H | 1.1770  | -2.7355 | -0.3598 |
| C | -0.6625 | -3.8398 | -0.7653 |
| O | 0.0584  | -4.9749 | -0.6120 |
| O | -1.7934 | -3.8194 | -1.1949 |
| C | -0.6032 | -6.1958 | -0.9906 |
| H | -0.8685 | -6.1733 | -2.0485 |
| H | 0.1150  | -6.9882 | -0.7923 |
| H | -0.3144 | -1.7151 | -0.6622 |
| H | -1.5079 | -6.3389 | -0.3979 |
| H | -0.2336 | -2.4922 | 1.9406  |

**CH<sub>3</sub>COOCH<sub>2</sub>**

|   |         |         |         |
|---|---------|---------|---------|
| C | 0.0482  | -2.6219 | -0.2751 |
| H | -0.0149 | -2.7155 | 0.8116  |
| H | 1.1077  | -2.5863 | -0.5398 |
| C | -0.6075 | -3.8025 | -0.9327 |
| O | 0.0039  | -4.9714 | -0.5363 |
| O | -1.5325 | -3.7811 | -1.6993 |
| C | -0.4583 | -6.1542 | -1.0332 |
| H | -1.2863 | -6.1449 | -1.7230 |
| H | 0.0733  | -7.0184 | -0.6738 |
| H | -0.4462 | -1.7084 | -0.5984 |

**TS3-4**

|   |         |         |         |
|---|---------|---------|---------|
| C | 0.0599  | -2.6238 | -0.2916 |
| H | 0.0020  | -2.6575 | 0.7990  |
| H | 1.1173  | -2.6447 | -0.5642 |
| C | -0.6489 | -3.8147 | -0.8747 |
| O | -0.0477 | -4.9762 | -0.4690 |
| O | -1.6073 | -3.7926 | -1.6003 |
| C | -0.6132 | -6.1817 | -0.8995 |
| H | -1.6100 | -6.4921 | -0.0815 |
| H | -1.0821 | -6.1237 | -1.8790 |
| H | 0.1113  | -6.9788 | -0.7622 |
| H | -2.3193 | -6.6929 | 0.5335  |
| H | -0.4040 | -1.7110 | -0.6586 |

---

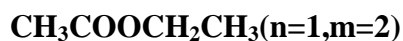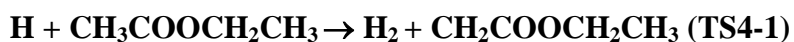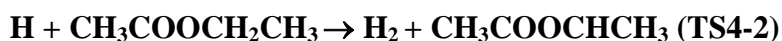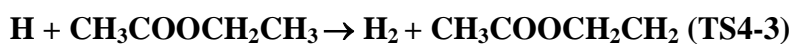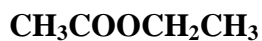

|   |         |         |         |
|---|---------|---------|---------|
| C | -0.1691 | -2.6519 | -0.1480 |
| H | -0.1631 | -2.6747 | 0.9444  |
| H | 0.8717  | -2.6452 | -0.4799 |
| C | -0.8744 | -3.8720 | -0.6837 |
| O | -0.2568 | -5.0048 | -0.2805 |
| O | -1.8606 | -3.8638 | -1.3794 |
| C | -0.8389 | -6.2549 | -0.7263 |
| H | -1.8722 | -6.3036 | -0.3746 |
| H | -0.8593 | -6.2605 | -1.8186 |
| H | -0.6774 | -1.7556 | -0.4974 |
| C | 0.0059  | -7.3809 | -0.1673 |
| H | 0.0190  | -7.3575 | 0.9249  |
| H | -0.4069 | -8.3426 | -0.4843 |
| H | 1.0356  | -7.3154 | -0.5263 |

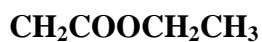

|   |         |         |         |
|---|---------|---------|---------|
| C | 0.1210  | -2.6443 | -0.4921 |
| H | 1.1451  | -2.7152 | -0.1527 |
| C | -0.6367 | -3.8293 | -0.8287 |
| O | 0.0925  | -4.9628 | -0.6612 |
| O | -1.7918 | -3.8258 | -1.2172 |
| C | -0.5770 | -6.2065 | -0.9723 |
| H | -0.9079 | -6.1750 | -2.0135 |
| H | -0.3643 | -1.6838 | -0.5889 |
| H | -1.4677 | -6.2911 | -0.3446 |
| C | 0.4052  | -7.3323 | -0.7215 |
| H | -0.0685 | -8.2910 | -0.9490 |
| H | 1.2899  | -7.2284 | -1.3538 |
| H | 0.7259  | -7.3475 | 0.3226  |

**TS4-1**

|   |         |         |         |
|---|---------|---------|---------|
| C | 0.0877  | -2.6400 | -0.3009 |
| H | -0.1200 | -2.5674 | 0.9793  |
| H | 1.1703  | -2.7140 | -0.3580 |
| C | -0.6605 | -3.8355 | -0.7625 |
| O | 0.0686  | -4.9632 | -0.6059 |
| O | -1.7920 | -3.8209 | -1.1923 |
| C | -0.5772 | -6.2061 | -0.9794 |
| H | -0.8636 | -6.1468 | -2.0319 |
| H | -0.3287 | -1.7068 | -0.6674 |
| H | -1.4913 | -6.3137 | -0.3908 |
| H | -0.2465 | -2.4720 | 1.9387  |
| C | 0.4052  | -7.3294 | -0.7186 |
| H | -0.0497 | -8.2854 | -0.9907 |
| H | 1.3136  | -7.2013 | -1.3113 |
| H | 0.6832  | -7.3701 | 0.3368  |

**CH<sub>3</sub>COOCHCH<sub>3</sub>**

|   |         |         |         |
|---|---------|---------|---------|
| C | -0.1230 | -2.6376 | 0.0425  |
| H | 0.1710  | -2.6972 | 1.0925  |
| H | 0.7930  | -2.6075 | -0.5534 |
| C | -0.9402 | -3.8395 | -0.3430 |
| O | -0.2715 | -4.9951 | -0.0266 |
| O | -2.0250 | -3.8308 | -0.8635 |
| C | -0.8392 | -6.2071 | -0.3495 |
| H | -1.8605 | -6.1797 | -0.7001 |
| C | -0.1421 | -7.3917 | 0.1975  |
| H | -0.2227 | -7.4538 | 1.2942  |
| H | -0.5741 | -8.3038 | -0.2190 |
| H | 0.9267  | -7.3743 | -0.0427 |
| H | -0.7038 | -1.7348 | -0.1341 |

**TS4-2**

|   |         |         |         |
|---|---------|---------|---------|
| C | -0.1263 | -2.6510 | 0.0582  |
| H | 0.1588  | -2.7506 | 1.1075  |
| H | 0.7942  | -2.5819 | -0.5267 |
| C | -0.9166 | -3.8526 | -0.3844 |
| O | -0.2268 | -5.0026 | -0.1242 |
| O | -2.0049 | -3.8378 | -0.8974 |
| C | -0.8110 | -6.2269 | -0.5181 |
| H | -1.8985 | -6.1904 | -0.4640 |
| H | -0.5832 | -6.3560 | -1.7823 |
| C | -0.1401 | -7.3786 | 0.1755  |
| H | -0.3097 | -7.3367 | 1.2565  |
| H | -0.5458 | -8.3216 | -0.1987 |
| H | 0.9376  | -7.3698 | -0.0030 |
| H | -0.3517 | -6.4599 | -2.7448 |
| H | -0.7221 | -1.7524 | -0.0864 |

**CH<sub>3</sub>COOCH<sub>2</sub>CH<sub>2</sub>**

|   |         |         |         |
|---|---------|---------|---------|
| C | -0.4452 | -2.6914 | -0.0260 |
| H | -0.4075 | -2.7404 | 1.0642  |
| H | 0.5852  | -2.6700 | -0.3889 |
| C | -1.1540 | -3.9021 | -0.5769 |
| O | -0.5691 | -5.0427 | -0.1455 |
| O | -2.1125 | -3.8834 | -1.3099 |
| C | -1.1560 | -6.2826 | -0.6116 |
| H | -2.2300 | -6.2619 | -0.3744 |
| H | -1.0834 | -6.3272 | -1.7036 |
| C | -0.4556 | -7.4092 | 0.0397  |
| H | -0.0035 | -7.2823 | 1.0142  |
| H | -0.5134 | -8.3985 | -0.3943 |
| H | -0.9665 | -1.7907 | -0.3432 |



**TS4-3**

|   |         |         |         |
|---|---------|---------|---------|
| C | -0.4529 | -2.6799 | -0.0306 |
| H | -0.4050 | -2.7301 | 1.0592  |
| H | 0.5740  | -2.6432 | -0.4022 |
| C | -1.1481 | -3.8997 | -0.5776 |
| O | -0.5452 | -5.0334 | -0.1498 |
| O | -2.1111 | -3.8959 | -1.3044 |
| C | -1.1095 | -6.2781 | -0.6221 |
| H | -2.1613 | -6.3246 | -0.3158 |
| H | -1.0908 | -6.2888 | -1.7154 |
| C | -0.3129 | -7.4001 | -0.0344 |
| H | -0.1260 | -7.3329 | 1.0355  |
| H | -0.6326 | -8.3894 | -0.3568 |
| H | 0.9535  | -7.3197 | -0.5714 |
| H | 1.7792  | -7.2614 | -0.9606 |
| H | -0.9900 | -1.7864 | -0.3417 |

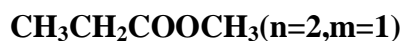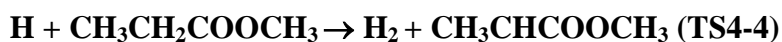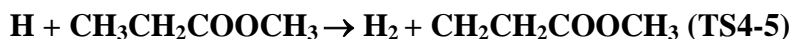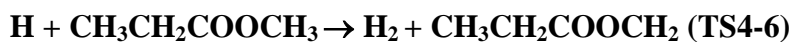

**CH<sub>3</sub>CH<sub>2</sub>COOCH<sub>3</sub>**

|   |         |         |         |
|---|---------|---------|---------|
| C | -0.7618 | -1.3332 | -0.5645 |
| H | -1.7974 | -1.2537 | -0.2282 |
| H | -0.7614 | -1.2279 | -1.6511 |
| C | -0.1443 | -2.6626 | -0.1389 |
| H | -0.1250 | -2.7634 | 0.9514  |
| H | 0.9008  | -2.7384 | -0.4571 |
| C | -0.8747 | -3.8678 | -0.6917 |
| O | -0.2821 | -5.0158 | -0.2908 |
| O | -1.8543 | -3.8410 | -1.3958 |
| C | -0.8888 | -6.2363 | -0.7535 |
| H | -1.9179 | -6.3102 | -0.3989 |
| H | -0.8829 | -6.2768 | -1.8437 |
| H | -0.2824 | -7.0379 | -0.3376 |
| H | -0.1970 | -0.5008 | -0.1382 |

**CH<sub>3</sub>CHCOOCH<sub>3</sub>**

|   |         |         |         |
|---|---------|---------|---------|
| C | -0.7563 | -1.3265 | -0.5888 |
| H | -1.8350 | -1.3980 | -0.7286 |
| H | -0.3317 | -0.7186 | -1.3984 |
| C | -0.1333 | -2.6701 | -0.5533 |
| H | 0.9376  | -2.7785 | -0.4266 |
| C | -0.9199 | -3.8786 | -0.6836 |
| O | -0.1406 | -4.9940 | -0.6219 |
| O | -2.1295 | -3.9228 | -0.8311 |
| C | -0.8336 | -6.2453 | -0.7418 |
| H | -1.5614 | -6.3604 | 0.0636  |
| H | -1.3531 | -6.3069 | -1.6998 |
| H | -0.0647 | -7.0121 | -0.6741 |
| H | -0.5545 | -0.7761 | 0.3397  |

**TS4-4**

|   |         |         |         |
|---|---------|---------|---------|
| C | -0.7583 | -1.3359 | -0.5584 |
| H | -1.8175 | -1.2823 | -0.3034 |
| H | -0.6717 | -1.1925 | -1.6401 |
| C | -0.1682 | -2.6675 | -0.1483 |
| H | -0.2100 | -2.7226 | 1.0959  |
| H | 0.9009  | -2.7749 | -0.3323 |
| C | -0.9290 | -3.8789 | -0.5843 |
| O | -0.1735 | -4.9950 | -0.4750 |
| O | -2.0798 | -3.8862 | -0.9556 |
| C | -0.8257 | -6.2337 | -0.8109 |
| H | -1.6878 | -6.3986 | -0.1631 |
| H | -1.1563 | -6.2210 | -1.8504 |
| H | -0.0765 | -7.0070 | -0.6564 |
| H | -0.2259 | -2.6853 | 2.1418  |
| H | -0.2325 | -0.5144 | -0.0666 |

**CH<sub>2</sub>CH<sub>2</sub>COOCH<sub>3</sub>**

|   |         |         |         |
|---|---------|---------|---------|
| C | -0.6559 | -1.3386 | -0.7670 |
| H | -1.4486 | -1.3266 | -1.5015 |
| C | -0.1514 | -2.6255 | -0.2247 |
| H | 0.9309  | -2.7426 | -0.3846 |
| C | -0.8306 | -3.8497 | -0.8086 |
| O | -0.3086 | -4.9778 | -0.2797 |
| O | -1.7141 | -3.8473 | -1.6287 |
| C | -0.8705 | -6.2168 | -0.7517 |
| H | -1.9366 | -6.2629 | -0.5255 |
| H | -0.7282 | -6.3141 | -1.8288 |
| H | -0.3323 | -6.9996 | -0.2218 |
| H | -0.2304 | -0.4057 | -0.4219 |
| H | -0.2628 | -2.6815 | 0.8690  |

**TS4-5**

|   |         |         |         |
|---|---------|---------|---------|
| C | -0.8584 | -1.3435 | -0.5905 |
| H | -2.0012 | -1.3133 | 0.1589  |
| H | -1.2493 | -1.2811 | -1.6029 |
| C | -0.1487 | -2.6272 | -0.2481 |
| H | 0.8763  | -2.6190 | -0.6471 |
| C | -0.8194 | -3.8591 | -0.8241 |
| O | -0.3670 | -4.9783 | -0.2203 |
| O | -1.6280 | -3.8650 | -1.7188 |
| C | -0.8974 | -6.2228 | -0.7155 |
| H | -1.9809 | -6.2498 | -0.5937 |
| H | -0.6518 | -6.3487 | -1.7709 |
| H | -0.4245 | -6.9978 | -0.1166 |
| H | -0.3525 | -0.4388 | -0.2593 |
| H | -0.0373 | -2.7579 | 0.8321  |
| H | -2.7475 | -1.3218 | 0.7002  |

**CH<sub>3</sub>CH<sub>2</sub>COOCH<sub>2</sub>**

|   |         |         |         |
|---|---------|---------|---------|
| C | -0.5061 | -1.2864 | -0.7345 |
| H | -1.5673 | -1.2262 | -0.4859 |
| H | -0.4125 | -1.1455 | -1.8130 |
| C | 0.0873  | -2.6238 | -0.2996 |
| H | 0.0146  | -2.7599 | 0.7850  |
| H | 1.1568  | -2.6815 | -0.5290 |
| C | -0.5813 | -3.8096 | -0.9501 |
| O | 0.0108  | -4.9800 | -0.5288 |
| O | -1.4984 | -3.7894 | -1.7264 |
| C | -0.4626 | -6.1650 | -1.0097 |
| H | -1.2829 | -6.1568 | -1.7086 |
| H | 0.0567  | -7.0299 | -0.6342 |
| H | 0.0114  | -0.4647 | -0.2345 |

**TS4-6**

|   |         |         |         |
|---|---------|---------|---------|
| C | -0.4928 | -1.2905 | -0.7540 |
| H | -1.5460 | -1.1986 | -0.4826 |
| H | -0.4223 | -1.1857 | -1.8384 |
| C | 0.0813  | -2.6265 | -0.2900 |
| H | 0.0320  | -2.7262 | 0.7997  |
| H | 1.1428  | -2.7181 | -0.5429 |
| C | -0.6317 | -3.8195 | -0.8807 |
| O | -0.0440 | -4.9830 | -0.4597 |
| O | -1.5789 | -3.7966 | -1.6210 |
| C | -0.6108 | -6.1872 | -0.8909 |
| H | -1.6221 | -6.4861 | -0.0877 |
| H | -1.0636 | -6.1331 | -1.8783 |
| H | 0.1059  | -6.9885 | -0.7373 |
| H | -2.3436 | -6.6794 | 0.5170  |
| H | 0.0546  | -0.4653 | -0.2931 |

---

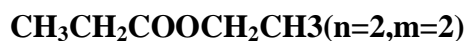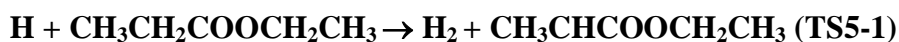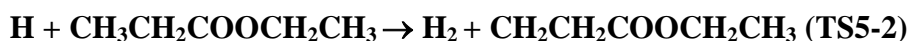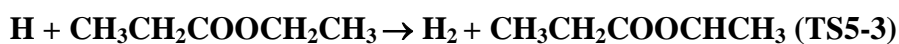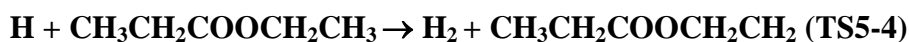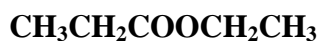

|   |         |         |         |
|---|---------|---------|---------|
| C | -0.7823 | -1.3375 | -0.5693 |
| H | -1.8198 | -1.2665 | -0.2375 |
| H | -0.7790 | -1.2376 | -1.6564 |
| C | -0.1537 | -2.6589 | -0.1349 |
| H | -0.1363 | -2.7524 | 0.9562  |
| H | 0.8928  | -2.7270 | -0.4500 |
| C | -0.8733 | -3.8747 | -0.6809 |
| O | -0.2626 | -5.0138 | -0.2859 |
| O | -1.8608 | -3.8568 | -1.3753 |
| C | -0.8539 | -6.2577 | -0.7370 |
| H | -1.8853 | -6.3037 | -0.3797 |
| H | -0.8796 | -6.2563 | -1.8292 |
| C | -0.0113 | -7.3914 | -0.1894 |
| H | 0.0078  | -7.3739 | 0.9026  |
| H | -0.4304 | -8.3492 | -0.5098 |
| H | 1.0164  | -7.3279 | -0.5540 |
| H | -0.2272 | -0.4973 | -0.1454 |

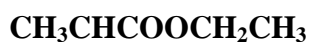

|   |         |         |         |
|---|---------|---------|---------|
| C | 0.0066  | -0.0017 | 0.0077  |
| H | -0.3486 | -0.5822 | 0.8694  |
| H | 1.0753  | 0.1804  | 0.1211  |
| C | -0.7401 | 1.2718  | -0.1172 |
| H | -1.8172 | 1.2699  | -0.2385 |
| C | -0.0697 | 2.5555  | -0.0833 |
| O | -0.9491 | 3.5851  | -0.2188 |
| O | 1.1321  | 2.7187  | 0.0490  |
| C | -0.3843 | 4.9148  | -0.2000 |
| H | 0.1401  | 5.0607  | 0.7480  |
| H | 0.3547  | 4.9943  | -1.0014 |
| C | -1.5215 | 5.9004  | -0.3769 |
| H | -2.2508 | 5.8068  | 0.4309  |
| H | -1.1290 | 6.9208  | -0.3684 |
| H | -2.0356 | 5.7388  | -1.3271 |
| H | -0.1542 | -0.6385 | -0.8722 |

**TS5-1**

|   |         |         |         |
|---|---------|---------|---------|
| C | 0.0055  | 0.0069  | -0.0130 |
| H | -0.0346 | -0.0562 | 1.0791  |
| H | 1.0570  | 0.0320  | -0.3023 |
| C | -0.7210 | 1.2407  | -0.5024 |
| H | -1.7890 | 1.2637  | -0.2850 |
| H | -0.7241 | 1.1971  | -1.7475 |
| C | -0.0642 | 2.5495  | -0.1935 |
| O | -0.9269 | 3.5773  | -0.3481 |
| O | 1.0957  | 2.6886  | 0.1210  |
| C | -0.3923 | 4.9082  | -0.1365 |
| H | 0.0057  | 4.9658  | 0.8792  |
| H | 0.4381  | 5.0637  | -0.8293 |
| C | -1.5175 | 5.8961  | -0.3647 |
| H | -2.3395 | 5.7227  | 0.3335  |
| H | -1.1486 | 6.9142  | -0.2137 |
| H | -1.9061 | 5.8197  | -1.3826 |
| H | -0.7383 | 1.0757  | -2.7876 |
| H | -0.4536 | -0.8970 | -0.4196 |

**CH<sub>2</sub>CH<sub>2</sub>COOCH<sub>2</sub>CH<sub>3</sub>**

|   |         |         |         |
|---|---------|---------|---------|
| C | -0.9359 | -1.3528 | -0.3514 |
| H | -1.9114 | -1.3473 | -0.8167 |
| C | -0.2274 | -2.6340 | -0.1042 |
| H | 0.0108  | -2.7722 | 0.9613  |
| H | 0.7553  | -2.6610 | -0.5988 |
| C | -0.9951 | -3.8621 | -0.5589 |
| O | -0.2933 | -4.9837 | -0.2930 |
| O | -2.0799 | -3.8616 | -1.0859 |
| C | -0.9079 | -6.2403 | -0.6760 |
| H | -1.8707 | -6.3258 | -0.1671 |
| H | -1.0992 | -6.2208 | -1.7513 |
| C | 0.0430  | -7.3532 | -0.2868 |
| H | 0.2267  | -7.3539 | 0.7900  |
| H | -0.3899 | -8.3188 | -0.5614 |
| H | 1.0010  | -7.2487 | -0.8010 |
| H | -0.4735 | -0.4177 | -0.0647 |

**TS5-2**

|   |         |         |         |
|---|---------|---------|---------|
| C | -0.8184 | -1.3532 | -0.6272 |
| H | -1.9030 | -1.2990 | -0.6763 |
| H | -0.4712 | -1.3097 | -1.9482 |
| C | -0.2590 | -2.6373 | -0.0730 |
| H | -0.3104 | -2.6366 | 1.0257  |
| H | 0.8011  | -2.7592 | -0.3130 |
| C | -1.0116 | -3.8719 | -0.5332 |
| O | -0.2863 | -4.9866 | -0.3112 |
| O | -2.1205 | -3.8774 | -1.0089 |
| C | -0.9112 | -6.2484 | -0.6617 |
| H | -1.8387 | -6.3466 | -0.0929 |
| H | -1.1707 | -6.2242 | -1.7224 |
| C | 0.0744  | -7.3527 | -0.3406 |
| H | 0.3259  | -7.3579 | 0.7224  |
| H | -0.3645 | -8.3214 | -0.5939 |
| H | 0.9965  | -7.2339 | -0.9139 |
| H | -0.3507 | -0.4478 | -0.2456 |
| H | -0.1941 | -1.3086 | -2.8279 |

**CH<sub>3</sub>CH<sub>2</sub>COOCHCH<sub>3</sub>**

|   |         |         |         |
|---|---------|---------|---------|
| C | -0.8466 | -1.3132 | -0.1659 |
| H | -1.7698 | -1.2586 | 0.4143  |
| H | -1.1122 | -1.1921 | -1.2176 |
| C | -0.1241 | -2.6369 | 0.0710  |
| H | 0.1597  | -2.7572 | 1.1217  |
| H | 0.8149  | -2.6833 | -0.4919 |
| C | -0.9448 | -3.8416 | -0.3249 |
| O | -0.2703 | -4.9979 | -0.0226 |
| O | -2.0331 | -3.8331 | -0.8382 |
| C | -0.8346 | -6.2093 | -0.3537 |
| H | -1.8592 | -6.1830 | -0.6951 |
| C | -0.1331 | -7.3953 | 0.1849  |
| H | -0.2138 | -7.4659 | 1.2812  |
| H | -0.5612 | -8.3061 | -0.2384 |
| H | 0.9356  | -7.3717 | -0.0547 |
| H | -0.2073 | -0.4771 | 0.1266  |



**TS5-3**

|   |         |         |         |
|---|---------|---------|---------|
| C | -0.8545 | -1.3265 | -0.1424 |
| H | -1.7871 | -1.3042 | 0.4245  |
| H | -1.1052 | -1.1730 | -1.1934 |
| C | -0.1168 | -2.6473 | 0.0607  |
| H | 0.1545  | -2.7995 | 1.1106  |
| H | 0.8298  | -2.6645 | -0.4903 |
| C | -0.9142 | -3.8517 | -0.3844 |
| O | -0.2244 | -5.0025 | -0.1261 |
| O | -2.0044 | -3.8375 | -0.8938 |
| C | -0.8103 | -6.2265 | -0.5171 |
| H | -1.8976 | -6.1906 | -0.4570 |
| H | -0.5900 | -6.3563 | -1.7819 |
| C | -0.1359 | -7.3784 | 0.1729  |
| H | -0.2997 | -7.3365 | 1.2547  |
| H | -0.5435 | -8.3214 | -0.1992 |
| H | 0.9409  | -7.3695 | -0.0112 |
| H | -0.3645 | -6.4615 | -2.7468 |
| H | -0.2316 | -0.4924 | 0.1885  |

**CH<sub>3</sub>CH<sub>2</sub>COOCH<sub>2</sub>CH<sub>2</sub>**

|   |         |         |         |
|---|---------|---------|---------|
| C | -1.0627 | -1.3658 | -0.4784 |
| H | -2.1073 | -1.2868 | -0.1716 |
| H | -1.0330 | -1.2752 | -1.5659 |
| C | -0.4507 | -2.6862 | -0.0180 |
| H | -0.4610 | -2.7722 | 1.0738  |
| H | 0.6029  | -2.7613 | -0.3066 |
| C | -1.1604 | -3.9027 | -0.5741 |
| O | -0.5706 | -5.0416 | -0.1442 |
| O | -2.1221 | -3.8883 | -1.3033 |
| C | -1.1579 | -6.2835 | -0.6028 |
| H | -2.2286 | -6.2691 | -0.3502 |
| H | -1.1013 | -6.3273 | -1.6958 |
| C | -0.4427 | -7.4073 | 0.0372  |
| H | 0.0310  | -7.2764 | 1.0008  |
| H | -0.5075 | -8.3979 | -0.3928 |
| H | -0.5134 | -0.5250 | -0.0483 |

**TS5-4**

|   |         |         |         |
|---|---------|---------|---------|
| C | -1.0759 | -1.3621 | -0.4778 |
| H | -2.1188 | -1.2949 | -0.1624 |
| H | -1.0558 | -1.2698 | -1.5653 |
| C | -0.4458 | -2.6762 | -0.0242 |
| H | -0.4462 | -2.7640 | 1.0674  |
| H | 0.6063  | -2.7394 | -0.3212 |
| C | -1.1457 | -3.8993 | -0.5769 |
| O | -0.5430 | -5.0334 | -0.1491 |
| O | -2.1105 | -3.8965 | -1.3017 |
| C | -1.1109 | -6.2783 | -0.6149 |
| H | -2.1593 | -6.3267 | -0.2970 |
| H | -1.1044 | -6.2897 | -1.7083 |
| C | -0.3068 | -7.3995 | -0.0359 |
| H | -0.1066 | -7.3311 | 1.0315  |
| H | -0.6298 | -8.3895 | -0.3532 |
| H | 0.9528  | -7.3189 | -0.5884 |
| H | 1.7736  | -7.2604 | -0.9881 |
| H | -0.5324 | -0.5160 | -0.0510 |

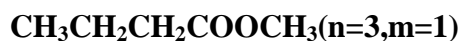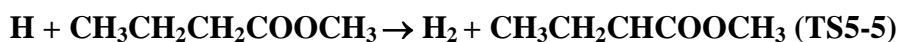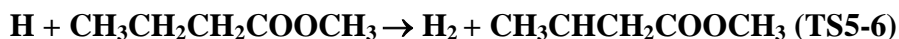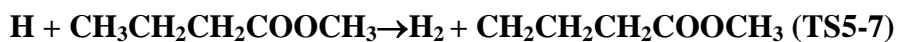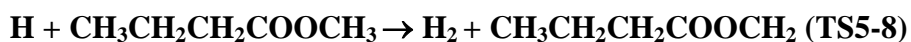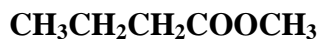

|   |         |         |         |
|---|---------|---------|---------|
| C | 3.2470  | -0.3001 | -0.0018 |
| H | 3.3579  | -0.9302 | 0.8865  |
| H | 4.0785  | 0.4092  | -0.0099 |
| H | 3.3538  | -0.9453 | -0.8797 |
| C | 1.9017  | 0.4304  | -0.0050 |
| H | 1.8330  | 1.0939  | 0.8618  |
| H | 1.8286  | 1.0779  | -0.8836 |
| C | 0.7164  | -0.5354 | 0.0065  |
| H | 0.7496  | -1.1898 | 0.8852  |
| H | 0.7465  | -1.2080 | -0.8583 |
| C | -0.6305 | 0.1544  | 0.0028  |
| O | -1.6357 | -0.7513 | -0.0010 |
| O | -0.8171 | 1.3467  | 0.0035  |
| C | -2.9710 | -0.2138 | -0.0039 |
| H | -3.1400 | 0.3955  | 0.8852  |
| H | -3.1350 | 0.3979  | -0.8923 |
| H | -3.6319 | -1.0778 | -0.0069 |

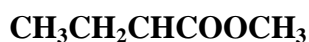

|   |         |         |         |
|---|---------|---------|---------|
| C | 3.0661  | -0.2721 | 0.4977  |
| H | 2.7636  | -0.1911 | 1.5446  |
| H | 3.9901  | 0.2965  | 0.3667  |
| H | 3.2852  | -1.3232 | 0.2897  |
| C | 1.9664  | 0.2689  | -0.4376 |
| H | 1.7679  | 1.3226  | -0.2306 |
| H | 2.3357  | 0.2129  | -1.4731 |
| C | 0.6962  | -0.4942 | -0.3455 |
| H | 0.6956  | -1.5710 | -0.4780 |
| C | -0.5737 | 0.1503  | -0.0842 |
| O | -1.5976 | -0.7483 | -0.0597 |
| O | -0.7382 | 1.3453  | 0.0954  |
| C | -2.9004 | -0.2011 | 0.1921  |
| H | -2.9296 | 0.2908  | 1.1662  |
| H | -3.1686 | 0.5240  | -0.5786 |
| H | -3.5818 | -1.0492 | 0.1722  |

**TS5-5**

|   |         |         |         |
|---|---------|---------|---------|
| C | 3.2273  | -0.2596 | -0.0934 |
| H | 3.3646  | -0.7242 | 0.8873  |
| H | 4.0528  | 0.4392  | -0.2490 |
| H | 3.3109  | -1.0465 | -0.8492 |
| C | 1.8799  | 0.4614  | -0.1829 |
| H | 1.8220  | 1.2655  | 0.5554  |
| H | 1.7850  | 0.9494  | -1.1613 |
| C | 0.6970  | -0.4691 | 0.0038  |
| H | 0.8056  | -0.9767 | 1.1415  |
| H | 0.7074  | -1.3556 | -0.6320 |
| C | -0.6492 | 0.1797  | 0.0324  |
| O | -1.6331 | -0.7262 | -0.1710 |
| O | -0.8569 | 1.3526  | 0.2417  |
| C | -2.9791 | -0.2198 | -0.1051 |
| H | -3.1779 | 0.2085  | 0.8784  |
| H | -3.1365 | 0.5451  | -0.8668 |
| H | -3.6213 | -1.0788 | -0.2860 |
| H | 0.9525  | -1.3938 | 2.0870  |

**CH<sub>3</sub>CHCH<sub>2</sub>COOCH<sub>3</sub>**

|   |         |         |         |
|---|---------|---------|---------|
| C | 3.2988  | -0.2019 | -0.0455 |
| H | 3.5674  | -0.6437 | 0.9282  |
| H | 4.0429  | 0.5651  | -0.2687 |
| H | 3.4141  | -1.0088 | -0.7825 |
| C | 1.9181  | 0.3548  | -0.0432 |
| H | 1.7468  | 1.4231  | -0.0262 |
| C | 0.7427  | -0.5492 | 0.0827  |
| H | 0.7625  | -1.1123 | 1.0322  |
| H | 0.7437  | -1.3336 | -0.6881 |
| C | -0.5968 | 0.1587  | 0.0271  |
| O | -1.6065 | -0.7389 | -0.0158 |
| O | -0.7713 | 1.3517  | 0.0314  |
| C | -2.9380 | -0.1922 | -0.0470 |
| H | -3.1280 | 0.4024  | 0.8477  |
| H | -3.0723 | 0.4356  | -0.9289 |
| H | -3.6036 | -1.0518 | -0.0838 |

**TS5-6**

|   |         |         |         |
|---|---------|---------|---------|
| C | 3.2219  | -0.2870 | -0.0902 |
| H | 3.3276  | -1.1916 | 0.5165  |
| H | 4.0141  | 0.4076  | 0.1993  |
| H | 3.3971  | -0.5701 | -1.1360 |
| C | 1.8566  | 0.3397  | 0.0782  |
| H | 1.7756  | 0.6719  | 1.3489  |
| H | 1.7439  | 1.3119  | -0.4012 |
| C | 0.6764  | -0.5735 | -0.1689 |
| H | 0.6612  | -1.4140 | 0.5311  |
| H | 0.7511  | -1.0241 | -1.1702 |
| C | -0.6622 | 0.1356  | -0.1193 |
| O | -1.6648 | -0.7420 | 0.0977  |
| O | -0.8367 | 1.3185  | -0.2787 |
| C | -2.9953 | -0.1900 | 0.1159  |
| H | -3.0870 | 0.5547  | 0.9075  |
| H | -3.2284 | 0.2751  | -0.8429 |
| H | -3.6562 | -1.0332 | 0.3039  |
| H | 1.7283  | 0.8513  | 2.2960  |

**CH<sub>2</sub>CH<sub>2</sub>CH<sub>2</sub>COOCH<sub>3</sub>**

|   |         |         |         |
|---|---------|---------|---------|
| C | 3.2792  | -0.3118 | 0.0016  |
| H | 4.1851  | 0.1965  | 0.3078  |
| H | 3.3805  | -1.2888 | -0.4572 |
| C | 1.9684  | 0.3934  | 0.0341  |
| H | 1.9040  | 1.0373  | 0.9185  |
| H | 1.8846  | 1.0884  | -0.8170 |
| C | 0.7722  | -0.5619 | 0.0027  |
| H | 0.7868  | -1.2390 | 0.8626  |
| H | 0.8128  | -1.2077 | -0.8818 |
| C | -0.5645 | 0.1466  | -0.0116 |
| O | -1.5803 | -0.7447 | 0.0280  |
| O | -0.7336 | 1.3408  | -0.0545 |
| C | -2.9095 | -0.1913 | 0.0140  |
| H | -3.0628 | 0.4553  | 0.8792  |
| H | -3.0738 | 0.3856  | -0.8972 |
| H | -3.5802 | -1.0468 | 0.0517  |

**TS5-7**

|   |         |         |         |
|---|---------|---------|---------|
| C | 3.1756  | -0.1531 | -0.1735 |
| H | 3.3304  | -1.0193 | 0.8725  |
| H | 4.0353  | 0.5020  | -0.0401 |
| H | 3.2875  | -0.8139 | -1.0339 |
| C | 1.8267  | 0.5040  | -0.0112 |
| H | 1.7719  | 1.0171  | 0.9538  |
| H | 1.7072  | 1.2920  | -0.7660 |
| C | 0.6669  | -0.4859 | -0.1331 |
| H | 0.7371  | -1.2705 | 0.6271  |
| H | 0.6948  | -1.0069 | -1.0969 |
| C | -0.6930 | 0.1655  | -0.0057 |
| O | -1.6768 | -0.7582 | -0.0745 |
| O | -0.9012 | 1.3460  | 0.1353  |
| C | -3.0233 | -0.2586 | 0.0295  |
| H | -3.1707 | 0.2446  | 0.9861  |
| H | -3.2343 | 0.4419  | -0.7797 |
| H | -3.6640 | -1.1344 | -0.0452 |
| H | 3.4112  | -1.5862 | 1.6008  |

**CH<sub>3</sub>CH<sub>2</sub>CH<sub>2</sub>COOCH<sub>2</sub>**

|   |         |         |         |
|---|---------|---------|---------|
| C | -3.1829 | -0.3258 | 0.0009  |
| H | -3.2808 | -0.9693 | -0.8810 |
| H | -4.0245 | 0.3713  | -0.0058 |
| H | -3.2835 | -0.9599 | 0.8857  |
| C | -1.8493 | 0.4257  | -0.0029 |
| H | -1.7872 | 1.0769  | -0.8795 |
| H | -1.7898 | 1.0865  | 0.8668  |
| C | -0.6502 | -0.5232 | 0.0039  |
| H | -0.6713 | -1.1932 | -0.8637 |
| H | -0.6731 | -1.1823 | 0.8798  |
| C | 0.6807  | 0.1861  | 0.0014  |
| O | 1.7087  | -0.7317 | -0.0008 |
| O | 0.8718  | 1.3727  | 0.0014  |
| C | 2.9944  | -0.2771 | -0.0024 |
| H | 3.1745  | 0.7854  | 0.0018  |
| H | 3.7357  | -1.0576 | -0.0039 |

**TS5-8**

|   |         |         |         |
|---|---------|---------|---------|
| C | 3.3053  | -0.3123 | 0.0816  |
| H | 3.3757  | -0.9143 | 0.9930  |
| H | 4.1427  | 0.3900  | 0.0836  |
| H | 3.4397  | -0.9855 | -0.7711 |
| C | 1.9684  | 0.4293  | 0.0036  |
| H | 1.8721  | 1.1193  | 0.8467  |
| H | 1.9356  | 1.0494  | -0.8970 |
| C | 0.7755  | -0.5272 | -0.0009 |
| H | 0.7705  | -1.1566 | 0.8968  |
| H | 0.8289  | -1.2252 | -0.8442 |
| C | -0.5609 | 0.1716  | -0.0678 |
| O | -1.5774 | -0.7464 | -0.1112 |
| O | -0.7526 | 1.3586  | -0.0868 |
| C | -2.8885 | -0.2593 | -0.1384 |
| H | -2.9951 | 0.6930  | -0.6528 |
| H | -3.5528 | -1.0546 | -0.4635 |
| H | -3.2649 | 0.0017  | 1.1053  |
| H | -3.5116 | 0.1724  | 2.0185  |

---

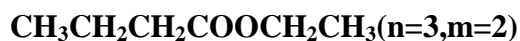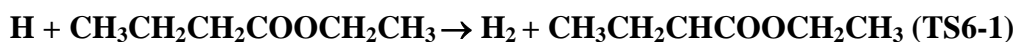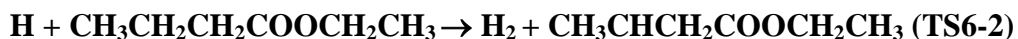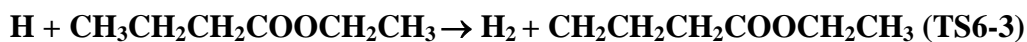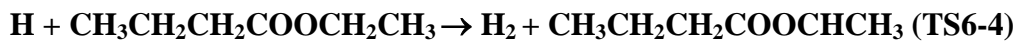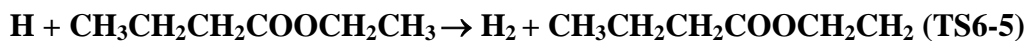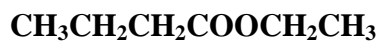

|   |         |         |         |
|---|---------|---------|---------|
| C | -0.0379 | -0.1213 | 0.0032  |
| H | -0.0414 | -0.1339 | 1.0978  |
| H | 1.0068  | -0.1045 | -0.3236 |
| C | -0.7845 | -1.3279 | -0.5719 |
| H | -1.8325 | -1.3042 | -0.2597 |
| H | -0.7970 | -1.2749 | -1.6645 |
| C | -0.1615 | -2.6554 | -0.1399 |
| H | -0.1439 | -2.7447 | 0.9526  |
| H | 0.8866  | -2.7208 | -0.4535 |
| C | -0.8793 | -3.8725 | -0.6841 |
| O | -0.2657 | -5.0101 | -0.2884 |
| O | -1.8677 | -3.8586 | -1.3775 |
| C | -0.8551 | -6.2557 | -0.7374 |
| H | -1.8861 | -6.3033 | -0.3791 |
| H | -0.8819 | -6.2558 | -1.8295 |
| C | -0.0099 | -7.3872 | -0.1891 |
| H | 0.0103  | -7.3681 | 0.9029  |
| H | -0.4274 | -8.3461 | -0.5078 |
| H | 1.0174  | -7.3222 | -0.5548 |
| H | -0.4999 | 0.8158  | -0.3181 |



**CH<sub>3</sub>CH<sub>2</sub>CHCOOCH<sub>2</sub>CH<sub>3</sub>**

|   |         |         |         |
|---|---------|---------|---------|
| C | -0.2031 | -0.2751 | -0.0287 |
| H | 0.1927  | -0.2368 | 0.9902  |
| H | 0.6204  | -0.5279 | -0.7010 |
| C | -1.3476 | -1.2997 | -0.1481 |
| H | -2.1730 | -0.9737 | 0.5042  |
| H | -1.7453 | -1.3213 | -1.1651 |
| C | -0.9459 | -2.6732 | 0.2478  |
| H | -0.4484 | -2.8435 | 1.1968  |
| C | -1.2077 | -3.8259 | -0.5895 |
| O | -0.7690 | -4.9774 | -0.0106 |
| O | -1.7520 | -3.7959 | -1.6810 |
| C | -0.9820 | -6.1923 | -0.7628 |
| H | -2.0533 | -6.3088 | -0.9464 |
| H | -0.4896 | -6.0961 | -1.7339 |
| C | -0.4172 | -7.3407 | 0.0486  |
| H | -0.9182 | -7.4207 | 1.0160  |
| H | -0.5624 | -8.2800 | -0.4918 |
| H | 0.6528  | -7.2076 | 0.2236  |
| H | -0.5582 | 0.7250  | -0.2892 |

**TS6-1**

|   |         |         |         |
|---|---------|---------|---------|
| C | -0.3576 | -0.1330 | 0.1880  |
| H | -0.1948 | -0.2192 | 1.2668  |
| H | 0.6221  | -0.0440 | -0.2903 |
| C | -1.1354 | -1.3330 | -0.3585 |
| H | -2.1260 | -1.3778 | 0.1118  |
| H | -1.3215 | -1.2173 | -1.4295 |
| C | -0.4310 | -2.6542 | -0.1176 |
| H | -0.1241 | -2.8271 | 0.9150  |
| H | 0.6738  | -2.5903 | -0.6996 |
| C | -1.0776 | -3.8630 | -0.7157 |
| O | -0.6105 | -4.9977 | -0.1495 |
| O | -1.8897 | -3.8471 | -1.6126 |
| C | -1.1176 | -6.2451 | -0.6865 |
| H | -2.2046 | -6.2545 | -0.5782 |
| H | -0.8888 | -6.2830 | -1.7541 |
| C | -0.4593 | -7.3748 | 0.0782  |
| H | -0.6945 | -7.3165 | 1.1434  |
| H | -0.8209 | -8.3345 | -0.3007 |
| H | 0.6263  | -7.3471 | -0.0384 |
| H | -0.9016 | 0.7973  | 0.0077  |
| H | 1.5956  | -2.4809 | -1.1775 |

**CH<sub>3</sub>CHCH<sub>2</sub>COOCH<sub>2</sub>CH<sub>3</sub>**

|   |         |         |         |
|---|---------|---------|---------|
| C | 0.0342  | -0.0609 | -0.1782 |
| H | -0.0964 | -0.0005 | 0.9124  |
| H | 1.1178  | 0.0310  | -0.3549 |
| C | -0.5158 | -1.3275 | -0.7345 |
| H | -1.2217 | -1.3202 | -1.5543 |
| C | -0.0505 | -2.6420 | -0.2155 |
| H | -0.1993 | -2.7287 | 0.8720  |
| H | 1.0377  | -2.7690 | -0.3422 |
| C | -0.7154 | -3.8410 | -0.8652 |
| O | -0.2811 | -4.9878 | -0.2996 |
| O | -1.5180 | -3.8046 | -1.7649 |
| C | -0.8275 | -6.2211 | -0.8311 |
| H | -1.9144 | -6.1951 | -0.7250 |
| H | -0.5977 | -6.2729 | -1.8978 |
| C | -0.2076 | -7.3675 | -0.0588 |
| H | -0.4431 | -7.2961 | 1.0054  |
| H | -0.5988 | -8.3171 | -0.4337 |
| H | 0.8787  | -7.3754 | -0.1729 |
| H | -0.4442 | 0.8155  | -0.6193 |

**TS6-2**

|   |         |         |         |
|---|---------|---------|---------|
| C | -0.0531 | -0.0860 | -0.0697 |
| H | 0.1656  | -0.1543 | 1.0005  |
| H | 0.8967  | 0.0975  | -0.5882 |
| C | -0.7158 | -1.3433 | -0.5843 |
| H | -1.8516 | -1.4378 | 0.0724  |
| H | -1.0717 | -1.2772 | -1.6123 |
| C | 0.0123  | -2.6387 | -0.3009 |
| H | 0.1189  | -2.8160 | 0.7731  |
| H | 1.0378  | -2.5879 | -0.6976 |
| C | -0.6332 | -3.8510 | -0.9442 |
| O | -0.2858 | -4.9832 | -0.2994 |
| O | -1.3418 | -3.8279 | -1.9210 |
| C | -0.7991 | -6.2251 | -0.8466 |
| H | -1.8894 | -6.1680 | -0.8731 |
| H | -0.4446 | -6.3246 | -1.8752 |
| C | -0.3084 | -7.3529 | 0.0375  |
| H | -0.6687 | -7.2330 | 1.0616  |
| H | -0.6779 | -8.3076 | -0.3464 |
| H | 0.7831  | -7.3906 | 0.0568  |
| H | -2.6504 | -1.5065 | 0.6109  |
| H | -0.6882 | 0.7888  | -0.2287 |

**CH<sub>2</sub>CH<sub>2</sub>CH<sub>2</sub>COOCH<sub>2</sub>CH<sub>3</sub>**

|   |         |         |         |
|---|---------|---------|---------|
| C | -0.0304 | -0.1223 | -0.4428 |
| H | 1.0502  | -0.1478 | -0.3574 |
| C | -0.7964 | -1.3196 | -0.8860 |
| H | -1.8042 | -1.3076 | -0.4560 |
| H | -0.9624 | -1.2892 | -1.9749 |
| C | -0.1020 | -2.6393 | -0.5378 |
| H | 0.0301  | -2.7423 | 0.5437  |
| H | 0.9080  | -2.6698 | -0.9628 |
| C | -0.8426 | -3.8603 | -1.0407 |
| O | -0.2475 | -4.9941 | -0.6114 |
| O | -1.8296 | -3.8494 | -1.7363 |
| C | -0.8487 | -6.2438 | -1.0348 |
| H | -1.8871 | -6.2633 | -0.6961 |
| H | -0.8536 | -6.2760 | -2.1268 |
| C | -0.0332 | -7.3711 | -0.4358 |
| H | -0.0356 | -7.3199 | 0.6553  |
| H | -0.4597 | -8.3324 | -0.7349 |
| H | 1.0023  | -7.3331 | -0.7814 |
| H | -0.5207 | 0.8374  | -0.3363 |

**TS6-3**

|   |         |         |         |
|---|---------|---------|---------|
| C | -0.0342 | -0.1210 | -0.3346 |
| H | -0.0771 | -0.1678 | 1.0303  |
| H | 1.0392  | -0.1107 | -0.5272 |
| C | -0.7895 | -1.3234 | -0.8458 |
| H | -1.8171 | -1.3099 | -0.4701 |
| H | -0.8794 | -1.2646 | -1.9382 |
| C | -0.1219 | -2.6470 | -0.4686 |
| H | -0.0412 | -2.7519 | 0.6181  |
| H | 0.9065  | -2.6890 | -0.8454 |
| C | -0.8530 | -3.8613 | -1.0013 |
| O | -0.2533 | -5.0001 | -0.5942 |
| O | -1.8380 | -3.8398 | -1.6994 |
| C | -0.8506 | -6.2445 | -1.0388 |
| H | -1.8861 | -6.2768 | -0.6926 |
| H | -0.8636 | -6.2542 | -2.1311 |
| C | -0.0242 | -7.3789 | -0.4690 |
| H | -0.0178 | -7.3494 | 0.6229  |
| H | -0.4480 | -8.3364 | -0.7838 |
| H | 1.0082  | -7.3284 | -0.8222 |
| H | -0.4993 | 0.8438  | -0.5319 |
| H | -0.1367 | -0.2194 | 1.9539  |

**CH<sub>3</sub>CH<sub>2</sub>CH<sub>2</sub>COOCHCH<sub>3</sub>**

|   |         |         |         |
|---|---------|---------|---------|
| C | -0.0047 | -0.1053 | 0.2731  |
| H | 0.2704  | -0.1504 | 1.3317  |
| H | 0.9219  | -0.0611 | -0.3080 |
| C | -0.8623 | -1.3064 | -0.1341 |
| H | -1.7971 | -1.3088 | 0.4342  |
| H | -1.1508 | -1.2228 | -1.1856 |
| C | -0.1384 | -2.6355 | 0.0836  |
| H | 0.1492  | -2.7639 | 1.1331  |
| H | 0.8013  | -2.6666 | -0.4813 |
| C | -0.9510 | -3.8404 | -0.3261 |
| O | -0.2772 | -4.9963 | -0.0184 |
| O | -2.0324 | -3.8346 | -0.8541 |
| C | -0.8328 | -6.2079 | -0.3627 |
| H | -1.8524 | -6.1835 | -0.7187 |
| C | -0.1354 | -7.3941 | 0.1809  |
| H | -0.2322 | -7.4700 | 1.2755  |
| H | -0.5541 | -8.3044 | -0.2528 |
| H | 0.9367  | -7.3660 | -0.0426 |
| H | -0.5419 | 0.8325  | 0.1107  |

**TS6-4**

|   |         |         |         |
|---|---------|---------|---------|
| C | -0.0173 | -0.1181 | 0.3054  |
| H | 0.2561  | -0.1880 | 1.3630  |
| H | 0.9099  | -0.0485 | -0.2722 |
| C | -0.8607 | -1.3173 | -0.1354 |
| H | -1.7973 | -1.3442 | 0.4293  |
| H | -1.1466 | -1.2097 | -1.1854 |
| C | -0.1228 | -2.6434 | 0.0506  |
| H | 0.1622  | -2.7967 | 1.0976  |
| H | 0.8189  | -2.6515 | -0.5109 |
| C | -0.9187 | -3.8489 | -0.3922 |
| O | -0.2288 | -4.9989 | -0.1275 |
| O | -2.0068 | -3.8385 | -0.9062 |
| C | -0.8110 | -6.2242 | -0.5194 |
| H | -1.8987 | -6.1894 | -0.4664 |
| H | -0.5824 | -6.3568 | -1.7820 |
| C | -0.1400 | -7.3740 | 0.1777  |
| H | -0.3111 | -7.3298 | 1.2583  |
| H | -0.5441 | -8.3182 | -0.1950 |
| H | 0.9380  | -7.3643 | 0.0008  |
| H | -0.5644 | 0.8178  | 0.1664  |
| H | -0.3501 | -6.4642 | -2.7456 |

**CH<sub>3</sub>CH<sub>2</sub>CH<sub>2</sub>COOCH<sub>2</sub>CH<sub>2</sub>**

|   |         |         |         |
|---|---------|---------|---------|
| C | -0.3345 | -0.1461 | 0.0960  |
| H | -0.3879 | -0.1407 | 1.1894  |
| H | 0.7240  | -0.1428 | -0.1831 |
| C | -1.0646 | -1.3559 | -0.4931 |
| H | -2.1250 | -1.3201 | -0.2278 |
| H | -1.0281 | -1.3199 | -1.5858 |
| C | -0.4710 | -2.6808 | -0.0137 |
| H | -0.5024 | -2.7533 | 1.0798  |
| H | 0.5891  | -2.7591 | -0.2798 |
| C | -1.1742 | -3.9005 | -0.5693 |
| O | -0.5762 | -5.0363 | -0.1414 |
| O | -2.1385 | -3.8931 | -1.2953 |
| C | -1.1599 | -6.2815 | -0.5959 |
| H | -2.2282 | -6.2746 | -0.3327 |
| H | -1.1140 | -6.3237 | -1.6895 |
| C | -0.4310 | -7.4012 | 0.0356  |
| H | 0.0541  | -7.2675 | 0.9931  |
| H | -0.4960 | -8.3925 | -0.3930 |
| H | -0.7735 | 0.7891  | -0.2610 |

**TS6-5**

|   |         |         |         |
|---|---------|---------|---------|
| C | -0.3455 | -0.1382 | 0.0945  |
| H | -0.3894 | -0.1354 | 1.1884  |
| H | 0.7104  | -0.1248 | -0.1939 |
| C | -1.0698 | -1.3534 | -0.4908 |
| H | -2.1282 | -1.3274 | -0.2165 |
| H | -1.0428 | -1.3150 | -1.5836 |
| C | -0.4603 | -2.6737 | -0.0190 |
| H | -0.4818 | -2.7488 | 1.0745  |
| H | 0.5983  | -2.7421 | -0.2940 |
| C | -1.1564 | -3.8983 | -0.5718 |
| O | -0.5478 | -5.0307 | -0.1465 |
| O | -2.1237 | -3.9000 | -1.2932 |
| C | -1.1145 | -6.2774 | -0.6089 |
| H | -2.1598 | -6.3309 | -0.2816 |
| H | -1.1180 | -6.2874 | -1.7023 |
| C | -0.3003 | -7.3959 | -0.0387 |
| H | -0.0898 | -7.3277 | 1.0267  |
| H | -0.6223 | -8.3869 | -0.3539 |
| H | 0.9533  | -7.3095 | -0.6034 |
| H | -0.7961 | 0.7936  | -0.2567 |
| H | 1.7698  | -7.2471 | -1.0114 |

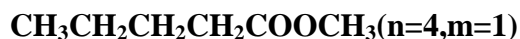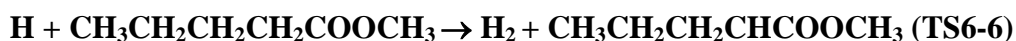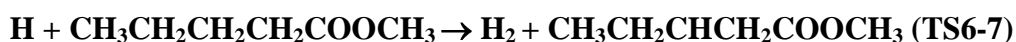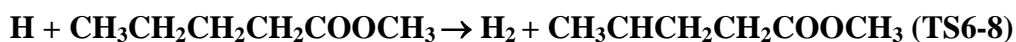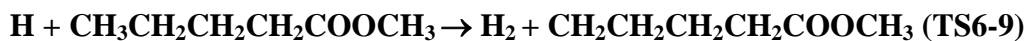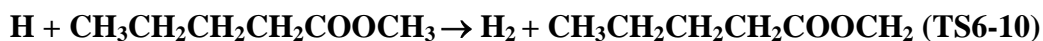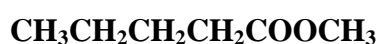

|   |         |         |         |
|---|---------|---------|---------|
| C | -0.0204 | -0.1234 | -0.0024 |
| H | -0.0187 | -0.1845 | 1.0930  |
| H | 1.0316  | -0.1678 | -0.3103 |
| C | -0.7703 | -1.3298 | -0.5778 |
| H | -1.8208 | -1.2944 | -0.2717 |
| H | -0.7757 | -1.2752 | -1.6714 |
| C | -0.1617 | -2.6622 | -0.1416 |
| H | -0.1529 | -2.7529 | 0.9508  |
| H | 0.8878  | -2.7376 | -0.4476 |
| C | -0.8854 | -3.8724 | -0.6906 |
| O | -0.2784 | -5.0156 | -0.2955 |
| O | -1.8714 | -3.8559 | -1.3861 |
| C | -0.8789 | -6.2413 | -0.7523 |
| H | -1.9028 | -6.3257 | -0.3852 |
| H | -0.8862 | -6.2806 | -1.8426 |
| H | -0.2597 | -7.0375 | -0.3449 |
| C | -0.6214 | 1.2164  | -0.4364 |
| H | -0.6062 | 1.3221  | -1.5255 |
| H | -1.6624 | 1.3068  | -0.1109 |
| H | -0.0664 | 2.0579  | -0.0128 |

**CH<sub>3</sub>CH<sub>2</sub>CH<sub>2</sub>CHCOOCH<sub>3</sub>**

|   |         |         |         |
|---|---------|---------|---------|
| C | -4.0610 | -2.3434 | -0.0382 |
| H | -4.7483 | -1.9180 | 0.7001  |
| H | -3.9045 | -1.5708 | -0.7994 |
| C | -2.7141 | -2.6586 | 0.6564  |
| H | -2.8644 | -3.4088 | 1.4366  |
| H | -2.0404 | -3.0965 | -0.0951 |
| C | -2.0667 | -1.4605 | 1.2450  |
| H | -1.7627 | -0.6350 | 0.6104  |
| C | -1.8406 | -1.3287 | 2.6690  |
| O | -1.2352 | -0.1468 | 2.9750  |
| O | -2.1426 | -2.1547 | 3.5140  |
| C | -0.9688 | 0.0737  | 4.3680  |
| H | -1.8970 | 0.0714  | 4.9424  |
| H | -0.3080 | -0.7014 | 4.7607  |
| H | -0.4886 | 1.0485  | 4.4225  |
| C | -4.6891 | -3.5830 | -0.6795 |
| H | -5.6409 | -3.3380 | -1.1583 |
| H | -4.0319 | -4.0106 | -1.4431 |
| H | -4.8817 | -4.3596 | 0.0666  |

**TS6-6**

|   |         |         |         |
|---|---------|---------|---------|
| C | -4.1215 | -2.3646 | -0.2394 |
| H | -5.0459 | -1.8759 | 0.0897  |
| H | -3.6726 | -1.6980 | -0.9857 |
| C | -3.1713 | -2.5048 | 0.9554  |
| H | -3.6061 | -3.1619 | 1.7145  |
| H | -2.2456 | -2.9989 | 0.6302  |
| C | -2.8098 | -1.1778 | 1.5928  |
| H | -3.8754 | -0.6564 | 1.9872  |
| H | -2.4408 | -0.4215 | 0.8986  |
| C | -1.9746 | -1.2506 | 2.8303  |
| O | -1.3960 | -0.0578 | 3.1003  |
| O | -1.8455 | -2.2270 | 3.5322  |
| C | -0.6127 | 0.0036  | 4.3065  |
| H | -1.2333 | -0.2170 | 5.1762  |
| H | 0.2102  | -0.7113 | 4.2638  |
| H | -0.2336 | 1.0220  | 4.3547  |
| H | -4.7926 | -0.2489 | 2.2751  |
| C | -4.4571 | -3.7088 | -0.8911 |
| H | -5.1373 | -3.5802 | -1.7370 |
| H | -3.5554 | -4.2056 | -1.2618 |
| H | -4.9376 | -4.3848 | -0.1774 |

**CH<sub>3</sub>CH<sub>2</sub>CHCH<sub>2</sub>COOCH<sub>3</sub>**

|   |         |         |         |
|---|---------|---------|---------|
| C | -4.2445 | -2.1814 | -0.3414 |
| H | -5.1532 | -1.6325 | -0.0492 |
| H | -3.8541 | -1.6223 | -1.2104 |
| C | -3.2526 | -2.1425 | 0.7711  |
| H | -2.6964 | -3.0304 | 1.0474  |
| C | -2.8984 | -0.8553 | 1.4285  |
| H | -3.7841 | -0.3401 | 1.8282  |
| H | -2.4754 | -0.1327 | 0.7094  |
| C | -1.8914 | -0.9880 | 2.5542  |
| O | -1.7291 | 0.1952  | 3.1875  |
| O | -1.2945 | -1.9899 | 2.8602  |
| C | -0.7784 | 0.2083  | 4.2686  |
| H | -1.0778 | -0.4931 | 5.0485  |
| H | 0.2149  | -0.0613 | 3.9070  |
| H | -0.7843 | 1.2279  | 4.6478  |
| C | -4.6199 | -3.5992 | -0.7854 |
| H | -5.3393 | -3.5790 | -1.6081 |
| H | -3.7374 | -4.1486 | -1.1254 |
| H | -5.0660 | -4.1624 | 0.0389  |

**TS6-7**

|   |         |         |         |
|---|---------|---------|---------|
| C | -4.2524 | -2.1989 | -0.2980 |
| H | -5.1328 | -1.5873 | -0.0648 |
| H | -3.7439 | -1.6849 | -1.1275 |
| C | -3.3239 | -2.2264 | 0.8979  |
| H | -4.0311 | -2.7552 | 1.8782  |
| H | -2.5039 | -2.9407 | 0.8132  |
| C | -2.8768 | -0.8808 | 1.4242  |
| H | -3.7214 | -0.2818 | 1.7767  |
| H | -2.4141 | -0.2936 | 0.6166  |
| C | -1.8431 | -0.9736 | 2.5287  |
| O | -1.8098 | 0.1645  | 3.2544  |
| O | -1.1162 | -1.9141 | 2.7339  |
| C | -0.8279 | 0.2143  | 4.3073  |
| H | -1.0033 | -0.5848 | 5.0286  |
| H | 0.1775  | 0.1123  | 3.8965  |
| H | -0.9540 | 1.1881  | 4.7752  |
| H | -4.5926 | -3.0710 | 2.5954  |
| C | -4.6944 | -3.5913 | -0.7579 |
| H | -5.3518 | -3.5279 | -1.6288 |
| H | -3.8326 | -4.2065 | -1.0332 |
| H | -5.2372 | -4.1140 | 0.0344  |



**CH<sub>3</sub>CHCH<sub>2</sub>CH<sub>2</sub>COOCH<sub>3</sub>**

|   |         |         |         |
|---|---------|---------|---------|
| C | -3.9613 | -2.4837 | -0.2673 |
| H | -3.8884 | -1.5961 | -0.8891 |
| C | -3.1272 | -2.5661 | 0.9678  |
| H | -3.6553 | -3.1360 | 1.7429  |
| H | -2.2108 | -3.1495 | 0.7770  |
| C | -2.7316 | -1.1952 | 1.5199  |
| H | -3.6189 | -0.6005 | 1.7616  |
| H | -2.1836 | -0.6139 | 0.7701  |
| C | -1.8717 | -1.2679 | 2.7620  |
| O | -1.5577 | -0.0278 | 3.2014  |
| O | -1.5007 | -2.2766 | 3.3112  |
| C | -0.7407 | 0.0366  | 4.3848  |
| H | -1.2456 | -0.4432 | 5.2245  |
| H | 0.2176  | -0.4564 | 4.2151  |
| H | -0.5962 | 1.0969  | 4.5805  |
| C | -4.6407 | -3.6914 | -0.8156 |
| H | -5.1627 | -4.2519 | -0.0304 |
| H | -5.3671 | -3.4344 | -1.5905 |
| H | -3.9237 | -4.3971 | -1.2683 |

**TS6-8**

|   |         |         |         |
|---|---------|---------|---------|
| C | -4.1014 | -2.4083 | -0.2303 |
| H | -5.1747 | -1.7540 | 0.1567  |
| H | -3.7023 | -1.7273 | -0.9874 |
| C | -3.2250 | -2.5162 | 1.0003  |
| H | -3.7520 | -3.0711 | 1.7836  |
| H | -2.3366 | -3.1169 | 0.7643  |
| C | -2.7844 | -1.1562 | 1.5427  |
| H | -3.6484 | -0.5413 | 1.8146  |
| H | -2.2446 | -0.5837 | 0.7798  |
| C | -1.8863 | -1.2571 | 2.7563  |
| O | -1.5638 | -0.0288 | 3.2188  |
| O | -1.4927 | -2.2795 | 3.2628  |
| C | -0.7056 | 0.0077  | 4.3743  |
| H | -1.1768 | -0.5015 | 5.2161  |
| H | 0.2499  | -0.4714 | 4.1558  |
| H | -0.5628 | 1.0629  | 4.5964  |
| H | -5.9801 | -1.3117 | 0.4669  |
| C | -4.6125 | -3.7089 | -0.8091 |
| H | -5.1299 | -4.3046 | -0.0511 |
| H | -5.3064 | -3.5348 | -1.6354 |
| H | -3.7845 | -4.3169 | -1.1947 |

**CH<sub>2</sub>CH<sub>2</sub>CH<sub>2</sub>CH<sub>2</sub>COOCH<sub>3</sub>**

|   |         |         |         |
|---|---------|---------|---------|
| C | -4.0828 | -2.3735 | -0.2749 |
| H | -3.5605 | -1.7562 | -1.0286 |
| C | -3.1793 | -2.5121 | 0.9588  |
| H | -3.6932 | -3.0986 | 1.7259  |
| H | -2.2814 | -3.0792 | 0.6956  |
| C | -2.7713 | -1.1584 | 1.5385  |
| H | -3.6468 | -0.5743 | 1.8421  |
| H | -2.2589 | -0.5468 | 0.7863  |
| C | -1.8496 | -1.2651 | 2.7341  |
| O | -1.6023 | -0.0441 | 3.2612  |
| O | -1.3777 | -2.2834 | 3.1772  |
| C | -0.7215 | -0.0134 | 4.3996  |
| H | -1.1358 | -0.6023 | 5.2191  |
| H | 0.2595  | -0.4105 | 4.1347  |
| H | -0.6468 | 1.0347  | 4.6808  |
| C | -4.4759 | -3.6769 | -0.8788 |
| H | -5.3239 | -3.7461 | -1.5492 |
| H | -3.8529 | -4.5557 | -0.7578 |
| H | -4.9825 | -1.7970 | -0.0187 |

**TS6-9**

|   |         |         |         |
|---|---------|---------|---------|
| C | -4.1083 | -2.3951 | -0.2391 |
| H | -3.5623 | -1.8527 | -1.0262 |
| C | -3.2139 | -2.5221 | 1.0000  |
| H | -3.7460 | -3.0711 | 1.7829  |
| H | -2.3300 | -3.1204 | 0.7595  |
| C | -2.7722 | -1.1635 | 1.5431  |
| H | -3.6309 | -0.5530 | 1.8407  |
| H | -2.2532 | -0.5829 | 0.7706  |
| C | -1.8359 | -1.2624 | 2.7283  |
| O | -1.6155 | -0.0433 | 3.2707  |
| O | -1.3302 | -2.2740 | 3.1489  |
| C | -0.7177 | -0.0047 | 4.3956  |
| H | -1.1006 | -0.6199 | 5.2109  |
| H | 0.2706  | -0.3667 | 4.1084  |
| H | -0.6706 | 1.0404  | 4.6937  |
| C | -4.5655 | -3.7250 | -0.7882 |
| H | -5.3916 | -4.2799 | 0.1481  |
| H | -5.2246 | -3.6793 | -1.6544 |
| H | -3.7934 | -4.4877 | -0.8917 |
| H | -4.9836 | -1.7752 | -0.0075 |
| H | -5.9643 | -4.6187 | 0.7916  |

**CH<sub>3</sub>CH<sub>2</sub>CH<sub>2</sub>CH<sub>2</sub>COOCH<sub>2</sub>**

|   |         |         |         |
|---|---------|---------|---------|
| C | -4.4393 | -2.5071 | -0.1156 |
| H | -5.0587 | -1.6020 | -0.1358 |
| H | -3.7324 | -2.4102 | -0.9488 |
| C | -3.6643 | -2.5637 | 1.2053  |
| H | -4.3641 | -2.6567 | 2.0421  |
| H | -3.0430 | -3.4648 | 1.2324  |
| C | -2.7811 | -1.3347 | 1.4202  |
| H | -3.3753 | -0.4134 | 1.4108  |
| H | -2.0563 | -1.2203 | 0.6057  |
| C | -2.0096 | -1.3652 | 2.7157  |
| O | -1.2379 | -0.2292 | 2.8359  |
| O | -2.0286 | -2.2264 | 3.5535  |
| C | -0.4656 | -0.0756 | 3.9490  |
| H | -0.4780 | -0.8428 | 4.7058  |
| H | 0.1054  | 0.8368  | 3.9647  |
| C | -5.3252 | -3.7357 | -0.3403 |
| H | -6.0655 | -3.8408 | 0.4588  |
| H | -5.8662 | -3.6682 | -1.2880 |
| H | -4.7299 | -4.6537 | -0.3615 |

**TS6-10**

|   |         |         |         |
|---|---------|---------|---------|
| C | -4.4292 | -2.5120 | -0.1188 |
| H | -5.0625 | -1.6172 | -0.1573 |
| H | -3.7066 | -2.4082 | -0.9377 |
| C | -3.6817 | -2.5481 | 1.2186  |
| H | -4.3972 | -2.6451 | 2.0414  |
| H | -3.0485 | -3.4402 | 1.2650  |
| C | -2.8209 | -1.3050 | 1.4426  |
| H | -3.4283 | -0.3928 | 1.4092  |
| H | -2.0762 | -1.1867 | 0.6475  |
| C | -2.0876 | -1.3051 | 2.7621  |
| O | -1.2843 | -0.1990 | 2.8606  |
| O | -2.1643 | -2.1347 | 3.6292  |
| C | -0.5635 | -0.0263 | 4.0470  |
| H | -0.2659 | -0.9581 | 4.5223  |
| H | 0.2287  | 0.6966  | 3.8756  |
| H | -1.3553 | 0.5524  | 4.9384  |
| H | -1.9508 | 0.9809  | 5.5596  |
| C | -5.2902 | -3.7560 | -0.3547 |
| H | -6.0450 | -3.8690 | 0.4296  |
| H | -5.8126 | -3.7024 | -1.3137 |
| H | -4.6799 | -4.6644 | -0.3586 |

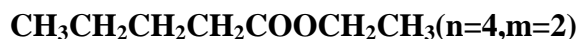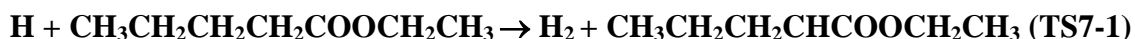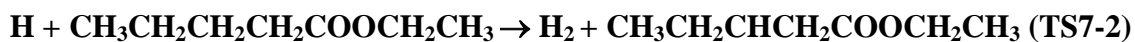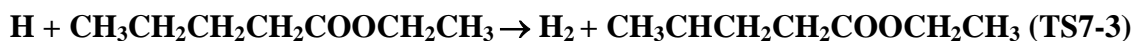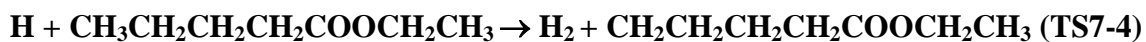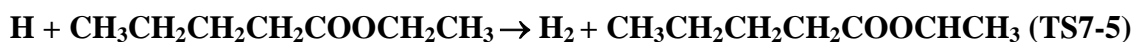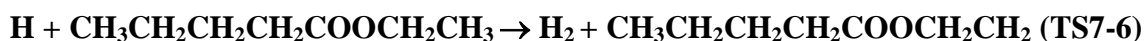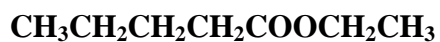

|   |         |         |         |
|---|---------|---------|---------|
| C | -0.0284 | -0.1128 | 0.0005  |
| H | -0.0489 | -0.1631 | 1.0962  |
| H | 1.0296  | -0.1612 | -0.2855 |
| C | -0.7680 | -1.3242 | -0.5779 |
| H | -1.8241 | -1.2858 | -0.2923 |
| H | -0.7527 | -1.2791 | -1.6719 |
| C | -0.1686 | -2.6530 | -0.1188 |
| H | -0.1782 | -2.7315 | 0.9747  |
| H | 0.8855  | -2.7337 | -0.4066 |
| C | -0.8885 | -3.8684 | -0.6640 |
| O | -0.2666 | -5.0068 | -0.2829 |
| O | -1.8855 | -3.8536 | -1.3448 |
| C | -0.8603 | -6.2514 | -0.7290 |
| H | -1.8831 | -6.3063 | -0.3488 |
| H | -0.9109 | -6.2431 | -1.8202 |
| C | -0.6189 | 1.2233  | -0.4588 |
| H | -0.5812 | 1.3183  | -1.5484 |
| H | -1.6663 | 1.3176  | -0.1557 |
| H | -0.0720 | 2.0686  | -0.0322 |
| C | 0.0013  | -7.3834 | -0.2081 |
| H | 0.0461  | -7.3723 | 0.8832  |
| H | -0.4196 | -8.3417 | -0.5245 |
| H | 1.0198  | -7.3116 | -0.5964 |

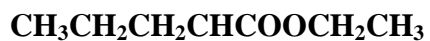

|   |         |         |         |
|---|---------|---------|---------|
| C | -0.1465 | -0.2970 | -0.2325 |
| H | -0.5639 | -0.6866 | 0.7016  |
| H | 0.9413  | -0.2761 | -0.1025 |
| C | -0.5062 | -1.2672 | -1.3834 |
| H | -1.5911 | -1.3141 | -1.5051 |
| H | -0.0887 | -0.8566 | -2.3149 |
| C | 0.0239  | -2.6379 | -1.1790 |
| H | 1.0934  | -2.8074 | -1.1149 |
| C | -0.8469 | -3.7861 | -1.0307 |
| O | -0.1389 | -4.9350 | -0.8511 |
| O | -2.0664 | -3.7547 | -1.0595 |
| C | -0.9129 | -6.1445 | -0.6932 |
| H | -1.5736 | -6.0295 | 0.1700  |
| H | -1.5437 | -6.2763 | -1.5761 |
| C | -0.6665 | 1.1206  | -0.4825 |
| H | -0.2401 | 1.5442  | -1.3972 |
| H | -1.7553 | 1.1289  | -0.5885 |
| H | -0.4073 | 1.7862  | 0.3452  |
| C | 0.0595  | -7.2928 | -0.5139 |
| H | 0.6823  | -7.1442 | 0.3712  |
| H | -0.4935 | -8.2280 | -0.3913 |
| H | 0.7129  | -7.3922 | -1.3836 |

**TS7-1**

|   |         |         |         |
|---|---------|---------|---------|
| C | -0.0149 | -0.1105 | -0.2575 |
| H | -0.1308 | -0.1312 | 0.8323  |
| H | 1.0612  | -0.1950 | -0.4521 |
| C | -0.7391 | -1.3170 | -0.8658 |
| H | -1.8151 | -1.2507 | -0.6789 |
| H | -0.6262 | -1.2982 | -1.9583 |
| C | -0.2251 | -2.6469 | -0.3516 |
| H | -0.4008 | -2.6557 | 0.8861  |
| H | 0.8560  | -2.7770 | -0.4186 |
| C | -0.9607 | -3.8625 | -0.8191 |
| O | -0.2330 | -4.9825 | -0.6125 |
| O | -2.0749 | -3.8655 | -1.2905 |
| C | -0.8646 | -6.2386 | -0.9654 |
| H | -1.7959 | -6.3303 | -0.4016 |
| H | -1.1193 | -6.2143 | -2.0275 |
| C | -0.5289 | 1.2252  | -0.8013 |
| H | -0.3947 | 1.2897  | -1.8856 |
| H | -1.5954 | 1.3526  | -0.5922 |
| H | 0.0015  | 2.0680  | -0.3502 |
| C | 0.1111  | -7.3503 | -0.6391 |
| H | 0.3573  | -7.3562 | 0.4251  |
| H | -0.3337 | -8.3160 | -0.8938 |
| H | 1.0371  | -7.2390 | -1.2078 |
| H | -0.5420 | -2.6063 | 1.9194  |

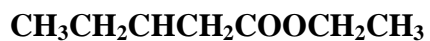

|   |         |         |         |
|---|---------|---------|---------|
| C | -0.0032 | -0.0542 | -0.0864 |
| H | 0.0328  | -0.1147 | 1.0124  |
| H | 1.0533  | 0.0551  | -0.3899 |
| C | -0.5605 | -1.3203 | -0.6428 |
| H | -1.2713 | -1.2986 | -1.4603 |
| C | -0.0430 | -2.6407 | -0.1923 |
| H | -0.1199 | -2.7609 | 0.8985  |
| H | 1.0371  | -2.7461 | -0.3933 |
| C | -0.7249 | -3.8319 | -0.8387 |
| O | -0.2822 | -4.9851 | -0.2928 |
| O | -1.5431 | -3.7854 | -1.7238 |
| C | -0.8365 | -6.2123 | -0.8303 |
| H | -1.9212 | -6.1898 | -0.7030 |
| H | -0.6273 | -6.2493 | -1.9019 |
| C | -0.7768 | 1.1999  | -0.5078 |
| H | -0.7868 | 1.3056  | -1.5964 |
| H | -1.8150 | 1.1520  | -0.1682 |
| H | -0.3259 | 2.1028  | -0.0880 |
| C | -0.1999 | -7.3677 | -0.0856 |
| H | -0.4149 | -7.3111 | 0.9838  |
| H | -0.5967 | -8.3130 | -0.4656 |
| H | 0.8840  | -7.3720 | -0.2207 |

**TS7-2**

|   |         |         |         |
|---|---------|---------|---------|
| C | -0.0454 | -0.0761 | -0.0757 |
| H | 0.1309  | -0.1609 | 1.0038  |
| H | 0.9516  | 0.0039  | -0.5347 |
| C | -0.7124 | -1.3379 | -0.5812 |
| H | -1.8446 | -1.4293 | 0.0887  |
| H | -1.0738 | -1.2737 | -1.6084 |
| C | 0.0115  | -2.6349 | -0.2953 |
| H | 0.1142  | -2.8136 | 0.7788  |
| H | 1.0382  | -2.5879 | -0.6889 |
| C | -0.6358 | -3.8457 | -0.9399 |
| O | -0.2851 | -4.9795 | -0.2993 |
| O | -1.3480 | -3.8211 | -1.9140 |
| C | -0.7996 | -6.2202 | -0.8479 |
| H | -1.8901 | -6.1639 | -0.8700 |
| H | -0.4491 | -6.3166 | -1.8782 |
| C | -0.8447 | 1.1962  | -0.3727 |
| H | -0.9993 | 1.3214  | -1.4485 |
| H | -1.8283 | 1.1635  | 0.1035  |
| H | -0.3235 | 2.0835  | -0.0045 |
| C | -0.3046 | -7.3501 | 0.0310  |
| H | -0.6610 | -7.2333 | 1.0569  |
| H | -0.6748 | -8.3040 | -0.3541 |
| H | 0.7870  | -7.3869 | 0.0460  |
| H | -2.6273 | -1.5140 | 0.6466  |



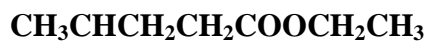

|   |         |         |         |
|---|---------|---------|---------|
| C | -0.0145 | -0.1232 | -0.2281 |
| H | 1.0502  | -0.2121 | -0.0318 |
| C | -0.7622 | -1.3286 | -0.6923 |
| H | -1.7989 | -1.2904 | -0.3345 |
| H | -0.8529 | -1.3282 | -1.7915 |
| C | -0.1169 | -2.6446 | -0.2538 |
| H | -0.0488 | -2.7027 | 0.8376  |
| H | 0.9146  | -2.7150 | -0.6167 |
| C | -0.8573 | -3.8729 | -0.7379 |
| O | -0.2502 | -5.0005 | -0.3069 |
| O | -1.8560 | -3.8743 | -1.4167 |
| C | -0.8582 | -6.2562 | -0.7002 |
| H | -1.8875 | -6.2751 | -0.3346 |
| H | -0.8914 | -6.3013 | -1.7912 |
| C | -0.6159 | 1.2370  | -0.3229 |
| H | -0.6758 | 1.5894  | -1.3666 |
| H | -1.6435 | 1.2509  | 0.0607  |
| H | -0.0360 | 1.9792  | 0.2312  |
| C | -0.0241 | -7.3745 | -0.1097 |
| H | 0.0027  | -7.3101 | 0.9804  |
| H | -0.4557 | -8.3403 | -0.3858 |
| H | 1.0017  | -7.3381 | -0.4834 |

**TS7-3**

|   |         |         |         |
|---|---------|---------|---------|
| C | -0.0268 | -0.1177 | -0.0522 |
| H | -0.0789 | -0.2058 | 1.2588  |
| H | 1.0524  | -0.1702 | -0.2227 |
| C | -0.7749 | -1.3281 | -0.5710 |
| H | -1.8130 | -1.3004 | -0.2237 |
| H | -0.8324 | -1.2793 | -1.6666 |
| C | -0.1303 | -2.6517 | -0.1583 |
| H | -0.0791 | -2.7412 | 0.9318  |
| H | 0.9068  | -2.7112 | -0.5070 |
| C | -0.8613 | -3.8672 | -0.6881 |
| O | -0.2560 | -5.0049 | -0.2853 |
| O | -1.8514 | -3.8487 | -1.3792 |
| C | -0.8557 | -6.2505 | -0.7226 |
| H | -1.8865 | -6.2860 | -0.3628 |
| H | -0.8832 | -6.2598 | -1.8146 |
| C | -0.6169 | 1.2342  | -0.3868 |
| H | -0.5866 | 1.4164  | -1.4684 |
| H | -1.6632 | 1.2996  | -0.0736 |
| H | -0.0662 | 2.0434  | 0.0994  |
| C | -0.0188 | -7.3831 | -0.1644 |
| H | 0.0026  | -7.3538 | 0.9272  |
| H | -0.4446 | -8.3415 | -0.4737 |
| H | 1.0084  | -7.3300 | -0.5319 |
| H | -0.1644 | -0.2588 | 2.2237  |

**CH<sub>2</sub>CH<sub>2</sub>CH<sub>2</sub>CH<sub>2</sub>COOCH<sub>2</sub>CH<sub>3</sub>**

|   |         |         |         |
|---|---------|---------|---------|
| C | 0.0026  | -0.1012 | -0.0685 |
| H | -0.0121 | -0.1468 | 1.0294  |
| H | 1.0728  | -0.1707 | -0.3364 |
| C | -0.7313 | -1.3163 | -0.6535 |
| H | -1.7877 | -1.2778 | -0.3724 |
| H | -0.7076 | -1.2684 | -1.7464 |
| C | -0.1274 | -2.6411 | -0.1903 |
| H | -0.1561 | -2.7308 | 0.9013  |
| H | 0.9332  | -2.7067 | -0.4603 |
| C | -0.8173 | -3.8584 | -0.7696 |
| O | -0.2750 | -4.9959 | -0.2813 |
| O | -1.7267 | -3.8436 | -1.5634 |
| C | -0.8377 | -6.2421 | -0.7625 |
| H | -1.9041 | -6.2578 | -0.5263 |
| H | -0.7370 | -6.2736 | -1.8499 |
| C | -0.5450 | 1.2065  | -0.5248 |
| H | -1.0770 | 1.2886  | -1.4657 |
| H | -0.3218 | 2.1206  | 0.0117  |
| C | -0.0889 | -7.3738 | -0.0891 |
| H | -0.1980 | -7.3249 | 0.9967  |
| H | -0.4871 | -8.3330 | -0.4309 |
| H | 0.9756  | -7.3387 | -0.3314 |

**TS7-4**

|   |         |         |         |
|---|---------|---------|---------|
| C | -0.0430 | -0.1026 | -0.0502 |
| H | -0.0074 | -0.1639 | 1.0448  |
| H | 1.0068  | -0.1266 | -0.3814 |
| C | -0.7796 | -1.3216 | -0.6188 |
| H | -1.8256 | -1.3025 | -0.2981 |
| H | -0.7983 | -1.2656 | -1.7114 |
| C | -0.1396 | -2.6413 | -0.1901 |
| H | -0.1402 | -2.7492 | 0.8999  |
| H | 0.9153  | -2.6809 | -0.4872 |
| C | -0.8163 | -3.8623 | -0.7776 |
| O | -0.2786 | -4.9968 | -0.2783 |
| O | -1.7105 | -3.8513 | -1.5886 |
| C | -0.8245 | -6.2460 | -0.7717 |
| H | -1.8954 | -6.2674 | -0.5571 |
| H | -0.7016 | -6.2759 | -1.8569 |
| C | -0.6553 | 1.2147  | -0.4608 |
| H | -0.9030 | 1.3149  | -1.5178 |
| H | -1.8854 | 1.2842  | 0.1287  |
| H | -0.1758 | 2.1066  | -0.0592 |
| C | -0.0833 | -7.3739 | -0.0838 |
| H | -0.2145 | -7.3263 | 0.9995  |
| H | -0.4693 | -8.3350 | -0.4342 |
| H | 0.9857  | -7.3329 | -0.3046 |
| H | -2.7042 | 1.3114  | 0.5609  |

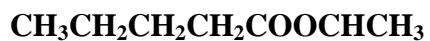

|   |         |         |         |
|---|---------|---------|---------|
| C | -0.0794 | -0.1015 | 0.0450  |
| H | -0.2514 | -0.1634 | 1.1267  |
| H | 1.0078  | -0.1516 | -0.0930 |
| C | -0.7357 | -1.3030 | -0.6438 |
| H | -1.8211 | -1.2612 | -0.5083 |
| H | -0.5663 | -1.2486 | -1.7243 |
| C | -0.2122 | -2.6391 | -0.1173 |
| H | -0.3796 | -2.7295 | 0.9627  |
| H | 0.8726  | -2.7201 | -0.2506 |
| C | -0.8480 | -3.8399 | -0.7759 |
| O | -0.2963 | -4.9982 | -0.2867 |
| O | -1.7161 | -3.8304 | -1.6091 |
| C | -0.7740 | -6.2093 | -0.7340 |
| H | -1.4538 | -6.1761 | -1.5728 |
| C | -0.5974 | 1.2416  | -0.4769 |
| H | -0.4085 | 1.3479  | -1.5496 |
| H | -1.6764 | 1.3364  | -0.3209 |
| H | -0.1129 | 2.0800  | 0.0308  |
| C | 0.0038  | -7.3896 | -0.2970 |
| H | 0.1454  | -7.3964 | 0.7894  |
| H | -0.5167 | -8.3059 | -0.5823 |
| H | 1.0072  | -7.4194 | -0.7505 |

**TS7-5**

|   |         |         |         |
|---|---------|---------|---------|
| C | -0.0691 | -0.1104 | 0.0365  |
| H | -0.2309 | -0.1566 | 1.1205  |
| H | 1.0159  | -0.1767 | -0.1118 |
| C | -0.7484 | -1.3115 | -0.6305 |
| H | -1.8319 | -1.2526 | -0.4854 |
| H | -0.5884 | -1.2738 | -1.7130 |
| C | -0.2392 | -2.6475 | -0.0900 |
| H | -0.3974 | -2.7225 | 0.9920  |
| H | 0.8430  | -2.7470 | -0.2327 |
| C | -0.8964 | -3.8503 | -0.7257 |
| O | -0.3786 | -5.0049 | -0.2084 |
| O | -1.7523 | -3.8354 | -1.5716 |
| C | -0.9095 | -6.2302 | -0.6672 |
| H | -2.0215 | -6.4111 | -0.0388 |
| H | -1.2208 | -6.1703 | -1.7096 |
| C | -0.5747 | 1.2329  | -0.4970 |
| H | -0.3950 | 1.3238  | -1.5727 |
| H | -1.6508 | 1.3436  | -0.3317 |
| H | -0.0745 | 2.0709  | -0.0042 |
| C | -0.0001 | -7.3692 | -0.3015 |
| H | 0.1896  | -7.3895 | 0.7742  |
| H | -0.4612 | -8.3168 | -0.5902 |
| H | 0.9615  | -7.2835 | -0.8182 |
| H | -2.8503 | -6.5564 | 0.4956  |

**CH<sub>3</sub>CH<sub>2</sub>CH<sub>2</sub>CH<sub>2</sub>COOCH<sub>2</sub>CH<sub>2</sub>**

|   |         |         |         |
|---|---------|---------|---------|
| C | -0.0261 | -0.1163 | -0.0181 |
| H | 0.0086  | -0.1877 | 1.0761  |
| H | 1.0172  | -0.1387 | -0.3567 |
| C | -0.7708 | -1.3307 | -0.5837 |
| H | -1.8128 | -1.3160 | -0.2480 |
| H | -0.8077 | -1.2669 | -1.6760 |
| C | -0.1277 | -2.6560 | -0.1761 |
| H | -0.0875 | -2.7574 | 0.9144  |
| H | 0.9142  | -2.7098 | -0.5117 |
| C | -0.8438 | -3.8737 | -0.7196 |
| O | -0.2278 | -5.0106 | -0.3203 |
| O | -1.8307 | -3.8649 | -1.4146 |
| C | -0.8135 | -6.2541 | -0.7762 |
| H | -1.8365 | -6.3333 | -0.3927 |
| H | -0.8982 | -6.2106 | -1.8724 |
| C | -0.6633 | 1.2164  | -0.4212 |
| H | -0.6814 | 1.3327  | -1.5093 |
| H | -1.6959 | 1.2846  | -0.0651 |
| H | -0.1116 | 2.0638  | -0.0054 |
| C | 0.0399  | -7.3716 | -0.3212 |
| H | -0.3665 | -8.3734 | -0.2794 |
| H | 1.0989  | -7.2208 | -0.1605 |

**TS7-6**

|   |         |         |         |
|---|---------|---------|---------|
| C | -0.0345 | -0.1099 | -0.0131 |
| H | -0.0338 | -0.1624 | 1.0827  |
| H | 1.0185  | -0.1445 | -0.3190 |
| C | -0.7696 | -1.3293 | -0.5801 |
| H | -1.8206 | -1.3043 | -0.2748 |
| H | -0.7749 | -1.2825 | -1.6741 |
| C | -0.1454 | -2.6512 | -0.1339 |
| H | -0.1355 | -2.7334 | 0.9593  |
| H | 0.9046  | -2.7178 | -0.4397 |
| C | -0.8578 | -3.8734 | -0.6707 |
| O | -0.2227 | -5.0067 | -0.2884 |
| O | -1.8578 | -3.8736 | -1.3462 |
| C | -0.8138 | -6.2520 | -0.7232 |
| H | -1.8386 | -6.3145 | -0.3466 |
| H | -0.8713 | -6.2502 | -1.8182 |
| C | -0.6503 | 1.2194  | -0.4586 |
| H | -0.6345 | 1.3167  | -1.5486 |
| H | -1.6927 | 1.3002  | -0.1354 |
| H | -0.1058 | 2.0706  | -0.0409 |
| C | 0.0401  | -7.3720 | -0.2179 |
| H | -0.0530 | -7.3628 | 1.1567  |
| H | -0.3357 | -8.3639 | -0.4628 |
| H | 1.1092  | -7.2603 | -0.3876 |
| H | -0.1510 | -7.3532 | 2.0662  |



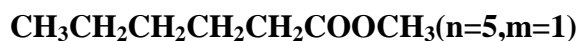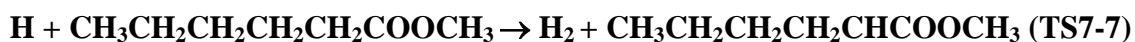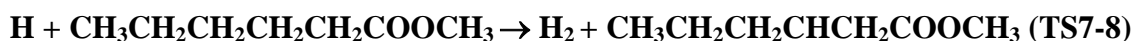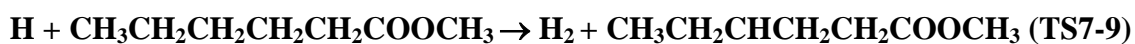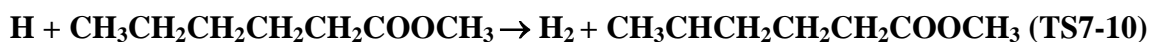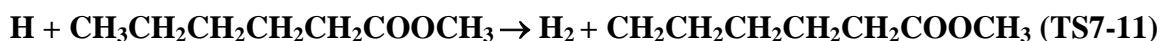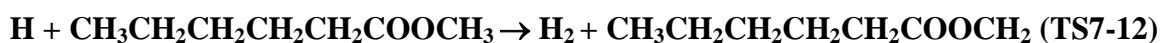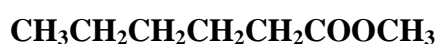

|   |         |         |         |
|---|---------|---------|---------|
| C | -0.0290 | -0.1187 | -0.0080 |
| H | -0.0279 | -0.1770 | 1.0886  |
| H | 1.0247  | -0.1599 | -0.3143 |
| C | -0.7763 | -1.3266 | -0.5830 |
| H | -1.8269 | -1.2942 | -0.2773 |
| H | -0.7812 | -1.2740 | -1.6766 |
| C | -0.1646 | -2.6572 | -0.1451 |
| H | -0.1546 | -2.7462 | 0.9474  |
| H | 0.8847  | -2.7312 | -0.4520 |
| C | -0.8867 | -3.8695 | -0.6915 |
| O | -0.2771 | -5.0111 | -0.2954 |
| O | -1.8737 | -3.8559 | -1.3857 |
| C | -0.8761 | -6.2385 | -0.7496 |
| H | -1.8991 | -6.3245 | -0.3802 |
| H | -0.8856 | -6.2791 | -1.8398 |
| H | -0.2546 | -7.0330 | -0.3425 |
| C | -0.6251 | 1.2261  | -0.4389 |
| H | -0.6255 | 1.2853  | -1.5340 |
| H | -1.6772 | 1.2681  | -0.1326 |
| C | 0.1234  | 2.4312  | 0.1376  |
| H | 0.1112  | 2.4184  | 1.2321  |
| H | 1.1708  | 2.4362  | -0.1805 |
| H | -0.3262 | 3.3734  | -0.1877 |

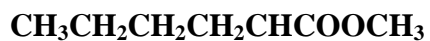

|   |         |         |         |
|---|---------|---------|---------|
| C | -3.8410 | -2.4085 | -0.2197 |
| H | -4.5762 | -1.9293 | 0.4363  |
| H | -3.5892 | -1.6739 | -0.9942 |
| C | -2.5743 | -2.7420 | 0.6050  |
| H | -2.8226 | -3.4563 | 1.3935  |
| H | -1.8506 | -3.2280 | -0.0655 |
| C | -1.9439 | -1.5428 | 1.2099  |
| H | -1.5362 | -0.7606 | 0.5787  |
| C | -1.8783 | -1.3483 | 2.6431  |
| O | -1.2656 | -0.1741 | 2.9641  |
| O | -2.3090 | -2.1202 | 3.4835  |
| C | -1.1542 | 0.1066  | 4.3672  |
| H | -2.1419 | 0.1586  | 4.8290  |
| H | -0.5694 | -0.6665 | 4.8691  |
| H | -0.6508 | 1.0690  | 4.4332  |
| C | -4.4644 | -3.6479 | -0.8710 |
| H | -3.7228 | -4.1249 | -1.5231 |
| H | -4.7032 | -4.3814 | -0.0920 |
| C | -5.7265 | -3.3289 | -1.6773 |
| H | -5.5127 | -2.6253 | -2.4880 |
| H | -6.1501 | -4.2320 | -2.1251 |
| H | -6.4974 | -2.8796 | -1.0437 |

**TS7-7**

|   |         |         |         |
|---|---------|---------|---------|
| C | -4.1214 | -2.3534 | -0.2379 |
| H | -5.0467 | -1.8635 | 0.0902  |
| H | -3.6722 | -1.6872 | -0.9858 |
| C | -3.1718 | -2.4970 | 0.9565  |
| H | -3.6067 | -3.1550 | 1.7146  |
| H | -2.2459 | -2.9904 | 0.6311  |
| C | -2.8092 | -1.1718 | 1.5974  |
| H | -3.8739 | -0.6510 | 1.9946  |
| H | -2.4402 | -0.4136 | 0.9053  |
| C | -1.9728 | -1.2497 | 2.8339  |
| O | -1.3913 | -0.0589 | 3.1067  |
| O | -1.8448 | -2.2283 | 3.5328  |
| C | -0.6059 | -0.0031 | 4.3119  |
| H | -1.2257 | -0.2253 | 5.1819  |
| H | 0.2152  | -0.7197 | 4.2655  |
| H | -0.2245 | 1.0143  | 4.3628  |
| H | -4.7903 | -0.2432 | 2.2849  |
| C | -4.4651 | -3.6938 | -0.8972 |
| H | -3.5392 | -4.1831 | -1.2228 |
| H | -4.9126 | -4.3584 | -0.1486 |
| C | -5.4152 | -3.5531 | -2.0897 |
| H | -4.9802 | -2.9210 | -2.8701 |
| H | -5.6396 | -4.5250 | -2.5371 |
| H | -6.3645 | -3.0994 | -1.7882 |

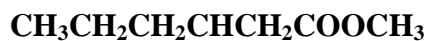

|   |         |         |         |
|---|---------|---------|---------|
| C | -4.2348 | -2.1487 | -0.3538 |
| H | -5.1438 | -1.5907 | -0.0759 |
| H | -3.8257 | -1.5928 | -1.2174 |
| C | -3.2597 | -2.1248 | 0.7735  |
| H | -2.7260 | -3.0222 | 1.0627  |
| C | -2.8952 | -0.8433 | 1.4363  |
| H | -3.7774 | -0.3205 | 1.8346  |
| H | -2.4629 | -0.1223 | 0.7214  |
| C | -1.8954 | -0.9896 | 2.5666  |
| O | -1.7082 | 0.1950  | 3.1908  |
| O | -1.3233 | -2.0024 | 2.8841  |
| C | -0.7627 | 0.1948  | 4.2765  |
| H | -1.0833 | -0.4916 | 5.0615  |
| H | 0.2253  | -0.1028 | 3.9226  |
| H | -0.7451 | 1.2177  | 4.6460  |
| C | -4.6247 | -3.5599 | -0.8134 |
| H | -3.7165 | -4.1049 | -1.0952 |
| H | -5.0573 | -4.1034 | 0.0339  |
| C | -5.6097 | -3.5614 | -1.9848 |
| H | -5.8654 | -4.5803 | -2.2880 |
| H | -6.5413 | -3.0508 | -1.7208 |
| H | -5.1892 | -3.0512 | -2.8574 |

**TS7-8**

|   |         |         |         |
|---|---------|---------|---------|
| C | -4.2556 | -2.1884 | -0.2925 |
| H | -5.1391 | -1.5793 | -0.0601 |
| H | -3.7469 | -1.6702 | -1.1207 |
| C | -3.3295 | -2.2211 | 0.9046  |
| H | -4.0378 | -2.7497 | 1.8837  |
| H | -2.5104 | -2.9363 | 0.8198  |
| C | -2.8800 | -0.8775 | 1.4343  |
| H | -3.7231 | -0.2789 | 1.7915  |
| H | -2.4197 | -0.2876 | 0.6273  |
| C | -1.8429 | -0.9743 | 2.5352  |
| O | -1.8014 | 0.1643  | 3.2596  |
| O | -1.1196 | -1.9181 | 2.7387  |
| C | -0.8150 | 0.2106  | 4.3084  |
| H | -0.9911 | -0.5867 | 5.0314  |
| H | 0.1882  | 0.1033  | 3.8935  |
| H | -0.9344 | 1.1856  | 4.7756  |
| H | -4.5999 | -3.0657 | 2.6002  |
| C | -4.7001 | -3.5769 | -0.7686 |
| H | -3.8120 | -4.1771 | -0.9982 |
| H | -5.2126 | -4.0905 | 0.0523  |
| C | -5.6162 | -3.5250 | -1.9941 |
| H | -5.9149 | -4.5282 | -2.3091 |
| H | -6.5285 | -2.9585 | -1.7830 |
| H | -5.1177 | -3.0453 | -2.8423 |

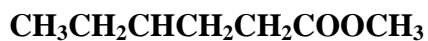

|   |         |         |         |
|---|---------|---------|---------|
| C | -3.9270 | -2.5126 | -0.2892 |
| H | -3.8411 | -1.6324 | -0.9223 |
| C | -3.1103 | -2.5841 | 0.9582  |
| H | -3.6501 | -3.1431 | 1.7328  |
| H | -2.1929 | -3.1718 | 0.7865  |
| C | -2.7180 | -1.2081 | 1.5003  |
| H | -3.6071 | -0.6059 | 1.7158  |
| H | -2.1513 | -0.6391 | 0.7554  |
| C | -1.8874 | -1.2695 | 2.7629  |
| O | -1.5516 | -0.0264 | 3.1771  |
| O | -1.5558 | -2.2721 | 3.3472  |
| C | -0.7638 | 0.0491  | 4.3794  |
| H | -1.3046 | -0.3902 | 5.2190  |
| H | 0.1832  | -0.4768 | 4.2498  |
| H | -0.5924 | 1.1100  | 4.5481  |
| C | -4.5974 | -3.7238 | -0.8470 |
| H | -5.0745 | -4.2861 | -0.0323 |
| H | -3.8378 | -4.4148 | -1.2554 |
| C | -5.6272 | -3.4182 | -1.9411 |
| H | -5.1634 | -2.8908 | -2.7802 |
| H | -6.0742 | -4.3363 | -2.3314 |
| H | -6.4333 | -2.7876 | -1.5559 |

**TS7-9**

|   |         |         |         |
|---|---------|---------|---------|
| C | -4.1244 | -2.3942 | -0.2147 |
| H | -5.1925 | -1.7373 | 0.1941  |
| H | -3.7314 | -1.7136 | -0.9768 |
| C | -3.2346 | -2.5084 | 1.0057  |
| H | -3.7519 | -3.0679 | 1.7921  |
| H | -2.3472 | -3.1052 | 0.7574  |
| C | -2.7911 | -1.1503 | 1.5510  |
| H | -3.6527 | -0.5401 | 1.8398  |
| H | -2.2644 | -0.5712 | 0.7838  |
| C | -1.8734 | -1.2564 | 2.7494  |
| O | -1.5655 | -0.0307 | 3.2289  |
| O | -1.4536 | -2.2801 | 3.2315  |
| C | -0.6886 | 0.0007  | 4.3705  |
| H | -1.1349 | -0.5348 | 5.2095  |
| H | 0.2726  | -0.4540 | 4.1265  |
| H | -0.5637 | 1.0541  | 4.6113  |
| H | -5.9844 | -1.3010 | 0.5422  |
| C | -4.6552 | -3.6897 | -0.7938 |
| H | -5.1985 | -4.2374 | -0.0144 |
| H | -3.8019 | -4.3285 | -1.0660 |
| C | -5.5558 | -3.4939 | -2.0169 |
| H | -5.0195 | -2.9867 | -2.8248 |
| H | -5.9094 | -4.4531 | -2.4037 |
| H | -6.4327 | -2.8895 | -1.7685 |

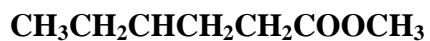

|   |         |         |         |
|---|---------|---------|---------|
| C | -4.0542 | -2.3480 | -0.3059 |
| H | -3.5228 | -1.7294 | -1.0538 |
| C | -3.1653 | -2.4982 | 0.9356  |
| H | -3.6907 | -3.0860 | 1.6941  |
| H | -2.2672 | -3.0683 | 0.6801  |
| C | -2.7562 | -1.1503 | 1.5282  |
| H | -3.6318 | -0.5621 | 1.8234  |
| H | -2.2303 | -0.5381 | 0.7859  |
| C | -1.8506 | -1.2682 | 2.7347  |
| O | -1.6095 | -0.0519 | 3.2763  |
| O | -1.3847 | -2.2905 | 3.1754  |
| C | -0.7438 | -0.0322 | 4.4262  |
| H | -1.1686 | -0.6289 | 5.2347  |
| H | 0.2407  | -0.4268 | 4.1705  |
| H | -0.6727 | 1.0132  | 4.7184  |
| C | -4.4603 | -3.6461 | -0.9203 |
| H | -3.8428 | -4.5207 | -0.7394 |
| H | -4.9531 | -1.7649 | -0.0535 |
| C | -5.5108 | -3.7065 | -1.9755 |
| H | -5.8182 | -4.7333 | -2.1876 |
| H | -6.4040 | -3.1363 | -1.6895 |
| H | -5.1647 | -3.2706 | -2.9282 |



**TS7-10**

|   |         |         |         |
|---|---------|---------|---------|
| C | -4.1208 | -2.3939 | -0.2332 |
| H | -3.5781 | -1.8573 | -1.0273 |
| C | -3.2194 | -2.5226 | 0.9997  |
| H | -3.7456 | -3.0742 | 1.7849  |
| H | -2.3346 | -3.1169 | 0.7538  |
| C | -2.7784 | -1.1638 | 1.5438  |
| H | -3.6356 | -0.5590 | 1.8557  |
| H | -2.2724 | -0.5780 | 0.7662  |
| C | -1.8219 | -1.2627 | 2.7128  |
| O | -1.6447 | -0.0543 | 3.2939  |
| O | -1.2662 | -2.2650 | 3.0904  |
| C | -0.7281 | -0.0148 | 4.4035  |
| H | -1.0684 | -0.6737 | 5.2035  |
| H | 0.2693  | -0.3229 | 4.0866  |
| H | -0.7207 | 1.0206  | 4.7372  |
| C | -4.5963 | -3.7234 | -0.7827 |
| H | -5.3467 | -4.2429 | 0.1637  |
| H | -3.7990 | -4.4679 | -0.8538 |
| H | -4.9930 | -1.7698 | 0.0026  |
| H | -5.9424 | -4.5880 | 0.8452  |
| C | -5.4810 | -3.6737 | -2.0088 |
| H | -5.8502 | -4.6667 | -2.2778 |
| H | -6.3463 | -3.0231 | -1.8485 |
| H | -4.9304 | -3.2806 | -2.8729 |

**CH<sub>2</sub>CH<sub>2</sub>CH<sub>2</sub>CH<sub>2</sub>COOCH<sub>3</sub>**

|   |         |         |         |
|---|---------|---------|---------|
| C | -4.0768 | -2.4081 | -0.2611 |
| H | -3.5364 | -1.8578 | -1.0419 |
| C | -3.1953 | -2.5305 | 0.9856  |
| H | -3.7288 | -3.0830 | 1.7658  |
| H | -2.3043 | -3.1234 | 0.7554  |
| C | -2.7672 | -1.1702 | 1.5357  |
| H | -3.6371 | -0.5569 | 1.7960  |
| H | -2.2196 | -0.5933 | 0.7818  |
| C | -1.8888 | -1.2619 | 2.7647  |
| O | -1.5510 | -0.0290 | 3.2075  |
| O | -1.5213 | -2.2790 | 3.3002  |
| C | -0.7105 | 0.0155  | 4.3753  |
| H | -1.2038 | -0.4675 | 5.2201  |
| H | 0.2391  | -0.4856 | 4.1820  |
| H | -0.5511 | 1.0722  | 4.5783  |
| C | -4.5167 | -3.7682 | -0.8247 |
| H | -3.6121 | -4.3705 | -1.0250 |
| H | -4.9683 | -1.8132 | -0.0287 |
| C | -5.3424 | -3.6718 | -2.0603 |
| H | -5.9883 | -4.4861 | -2.3656 |
| H | -5.2159 | -2.8435 | -2.7485 |
| H | -5.0614 | -4.3299 | -0.0545 |

**TS7-11**

|   |         |         |         |
|---|---------|---------|---------|
| C | -4.1100 | -2.3866 | -0.2442 |
| H | -3.5734 | -1.8385 | -1.0293 |
| C | -3.2169 | -2.5165 | 0.9936  |
| H | -3.7473 | -3.0661 | 1.7779  |
| H | -2.3321 | -3.1152 | 0.7548  |
| C | -2.7740 | -1.1601 | 1.5417  |
| H | -3.6362 | -0.5422 | 1.8158  |
| H | -2.2332 | -0.5846 | 0.7815  |
| C | -1.8767 | -1.2613 | 2.7562  |
| O | -1.5548 | -0.0322 | 3.2204  |
| O | -1.4821 | -2.2828 | 3.2635  |
| C | -0.6954 | 0.0030  | 4.3748  |
| H | -1.1646 | -0.5086 | 5.2164  |
| H | 0.2604  | -0.4745 | 4.1543  |
| H | -0.5535 | 1.0579  | 4.5990  |
| C | -4.5654 | -3.7412 | -0.8016 |
| H | -3.6786 | -4.3453 | -1.0465 |
| H | -4.9939 | -1.7846 | -0.0010 |
| C | -5.4382 | -3.6305 | -2.0282 |
| H | -5.8170 | -4.5701 | -2.4291 |
| H | -6.5969 | -3.0179 | -1.6398 |
| H | -5.0785 | -2.9606 | -2.8099 |
| H | -5.0965 | -4.3011 | -0.0221 |
| H | -7.3779 | -2.6183 | -1.3430 |

**CH<sub>3</sub>CH<sub>2</sub>CH<sub>2</sub>CH<sub>2</sub>CH<sub>2</sub>COOCH<sub>2</sub>**

|   |         |         |         |
|---|---------|---------|---------|
| C | -4.3676 | -2.5839 | -0.1677 |
| H | -4.8251 | -1.5892 | -0.2507 |
| H | -3.6568 | -2.6612 | -1.0010 |
| C | -3.6109 | -2.6900 | 1.1607  |
| H | -4.3138 | -2.6112 | 1.9962  |
| H | -3.1509 | -3.6796 | 1.2479  |
| C | -2.5312 | -1.6182 | 1.3081  |
| H | -2.9604 | -0.6114 | 1.2442  |
| H | -1.8021 | -1.6749 | 0.4914  |
| C | -1.7685 | -1.7070 | 2.6064  |
| O | -0.8122 | -0.7159 | 2.6650  |
| O | -1.9296 | -2.5040 | 3.4914  |
| C | -0.0191 | -0.6345 | 3.7713  |
| H | -0.1445 | -1.3576 | 4.5606  |
| H | 0.7121  | 0.1544  | 3.7299  |
| C | -5.4540 | -3.6523 | -0.3330 |
| H | -6.1658 | -3.5735 | 0.4974  |
| H | -4.9977 | -4.6458 | -0.2482 |
| C | -6.2067 | -3.5475 | -1.6625 |
| H | -6.9759 | -4.3200 | -1.7474 |
| H | -6.7002 | -2.5756 | -1.7627 |
| H | -5.5268 | -3.6617 | -2.5127 |

**TS7-12**

|   |         |         |         |
|---|---------|---------|---------|
| C | -4.4235 | -2.5037 | -0.1201 |
| H | -5.0578 | -1.6082 | -0.1579 |
| H | -3.7017 | -2.3987 | -0.9409 |
| C | -3.6766 | -2.5437 | 1.2172  |
| H | -4.3916 | -2.6420 | 2.0401  |
| H | -3.0430 | -3.4355 | 1.2621  |
| C | -2.8155 | -1.3013 | 1.4447  |
| H | -3.4223 | -0.3887 | 1.4110  |
| H | -2.0687 | -1.1822 | 0.6518  |
| C | -2.0862 | -1.3036 | 2.7664  |
| O | -1.2786 | -0.2008 | 2.8670  |
| O | -2.1692 | -2.1323 | 3.6338  |
| C | -0.5614 | -0.0304 | 4.0559  |
| H | -0.2694 | -0.9632 | 4.5328  |
| H | 0.2344  | 0.6892  | 3.8870  |
| H | -1.3541 | 0.5520  | 4.9441  |
| H | -1.9501 | 0.9831  | 5.5632  |
| C | -5.2893 | -3.7441 | -0.3680 |
| H | -6.0088 | -3.8504 | 0.4527  |
| H | -4.6554 | -4.6383 | -0.3331 |
| C | -6.0387 | -3.7007 | -1.7026 |
| H | -6.6458 | -4.5982 | -1.8481 |
| H | -6.7076 | -2.8359 | -1.7530 |
| H | -5.3435 | -3.6301 | -2.5450 |

---

**C<sub>9</sub>H<sub>22</sub>**

**H+CH<sub>3</sub>(CH<sub>2</sub>)<sub>7</sub>CH<sub>3</sub>→H<sub>2</sub>+CH<sub>3</sub>(CH<sub>2</sub>)<sub>3</sub>CH(CH<sub>2</sub>)<sub>3</sub>CH<sub>3</sub> (TS9-1)**

**CH<sub>3</sub>(CH<sub>2</sub>)<sub>7</sub>CH<sub>3</sub>**

|   |         |         |         |
|---|---------|---------|---------|
| C | -0.0355 | -0.0737 | -0.0131 |
| H | -0.0338 | -0.1416 | 1.0827  |
| H | 1.0174  | -0.1233 | -0.3207 |
| C | -0.7891 | -1.2757 | -0.5932 |
| H | -1.8415 | -1.2256 | -0.2848 |
| H | -0.7907 | -1.2069 | -1.6889 |
| C | -0.2049 | -2.6296 | -0.1740 |
| H | -0.2018 | -2.6986 | 0.9218  |
| H | 0.8474  | -2.6810 | -0.4834 |
| C | -0.6186 | 1.2808  | -0.4321 |
| H | -0.6202 | 1.3494  | -1.5269 |
| H | -1.6701 | 1.3312  | -0.1239 |
| C | 0.1412  | 2.4754  | 0.1521  |
| H | 0.1312  | 2.4535  | 1.2465  |
| H | 1.1882  | 2.4729  | -0.1677 |
| H | -0.2999 | 3.4248  | -0.1645 |
| C | -0.9602 | -3.8315 | -0.7528 |
| H | -2.0122 | -3.7807 | -0.4425 |
| H | -0.9640 | -3.7625 | -1.8486 |
| C | -0.3757 | -5.1853 | -0.3346 |
| H | -0.3695 | -5.2545 | 0.7613  |
| H | 0.6758  | -5.2382 | -0.6470 |
| C | -1.1324 | -6.3878 | -0.9100 |
| H | -2.1824 | -6.3365 | -0.5964 |
| H | -1.1395 | -6.3192 | -2.0049 |
| C | -0.5402 | -7.7356 | -0.4880 |
| H | -0.5497 | -7.8483 | 0.6010  |
| H | -1.1037 | -8.5713 | -0.9129 |
| H | 0.4986  | -7.8328 | -0.8203 |

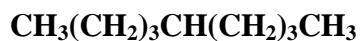

|   |         |         |         |
|---|---------|---------|---------|
| C | -0.0172 | -0.1166 | -0.0643 |
| H | 0.0128  | -0.3176 | 1.0135  |
| H | 1.0255  | -0.1293 | -0.4067 |
| C | -0.7889 | -1.2444 | -0.7636 |
| H | -1.8382 | -1.2329 | -0.4327 |
| H | -0.8362 | -1.0204 | -1.8460 |
| C | -0.2135 | -2.6052 | -0.5515 |
| C | -0.6120 | 1.2748  | -0.3060 |
| H | -0.6435 | 1.4719  | -1.3847 |
| H | -1.6545 | 1.2854  | 0.0350  |
| C | 0.1642  | 2.3940  | 0.3942  |
| H | 0.1848  | 2.2428  | 1.4781  |
| H | 1.2016  | 2.4329  | 0.0470  |
| H | -0.2859 | 3.3724  | 0.2042  |
| C | -0.9614 | -3.8408 | -0.9282 |
| H | -2.0068 | -3.7537 | -0.5963 |
| H | -1.0248 | -3.9210 | -2.0298 |
| C | -0.3543 | -5.1389 | -0.3779 |
| H | -0.3118 | -5.0789 | 0.7165  |
| H | 0.6853  | -5.2221 | -0.7197 |
| C | -1.1242 | -6.3983 | -0.7891 |
| H | -2.1637 | -6.3125 | -0.4494 |
| H | -1.1665 | -6.4546 | -1.8838 |
| C | -0.5127 | -7.6886 | -0.2356 |
| H | -0.4875 | -7.6766 | 0.8587  |
| H | -1.0856 | -8.5674 | -0.5446 |
| H | 0.5152  | -7.8219 | -0.5875 |
| H | 0.8473  | -2.6898 | -0.3269 |

**TS9-1**

|   |         |         |         |
|---|---------|---------|---------|
| C | -0.0248 | -0.0856 | -0.0056 |
| H | -0.0069 | -0.1728 | 1.0876  |
| H | 1.0208  | -0.1485 | -0.3341 |
| C | -0.8090 | -1.2651 | -0.5929 |
| H | -1.8574 | -1.2070 | -0.2724 |
| H | -0.8284 | -1.1754 | -1.6903 |
| C | -0.2474 | -2.6234 | -0.2256 |
| H | -0.3615 | -2.6994 | 1.0855  |
| C | -0.5951 | 1.2824  | -0.3958 |
| H | -0.6160 | 1.3671  | -1.4893 |
| H | -1.6394 | 1.3448  | -0.0664 |
| C | 0.1950  | 2.4555  | 0.1914  |
| H | 0.2055  | 2.4170  | 1.2852  |
| H | 1.2353  | 2.4419  | -0.1491 |
| H | -0.2377 | 3.4158  | -0.1027 |
| C | -0.9798 | -3.8391 | -0.7554 |
| H | -2.0284 | -3.7997 | -0.4327 |
| H | -1.0052 | -3.7858 | -1.8550 |
| C | -0.3601 | -5.1756 | -0.3301 |
| H | -0.3291 | -5.2263 | 0.7650  |
| H | 0.6840  | -5.2126 | -0.6672 |
| C | -1.1098 | -6.3971 | -0.8731 |
| H | -2.1528 | -6.3584 | -0.5357 |
| H | -1.1428 | -6.3440 | -1.9683 |
| C | -0.4853 | -7.7283 | -0.4455 |
| H | -0.4687 | -7.8251 | 0.6447  |
| H | -1.0444 | -8.5787 | -0.8456 |
| H | 0.5468  | -7.8135 | -0.7999 |
| H | -0.5144 | -2.7503 | 2.0398  |
| H | 0.8380  | -2.6872 | -0.3513 |

---



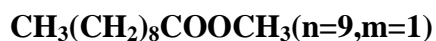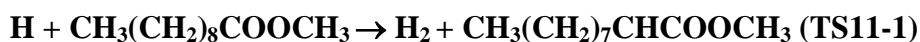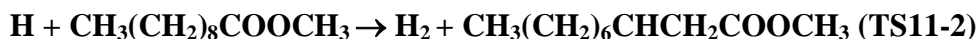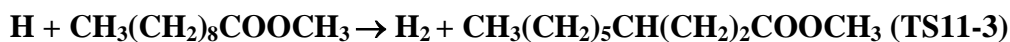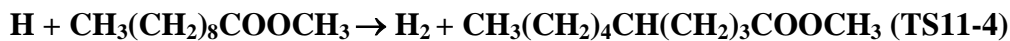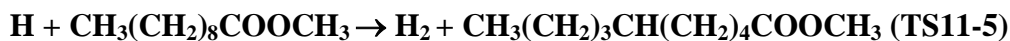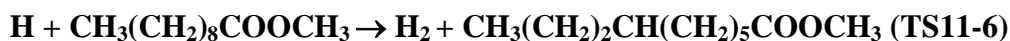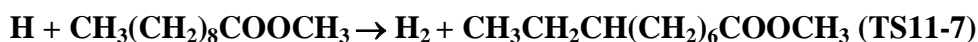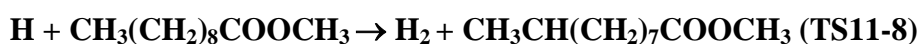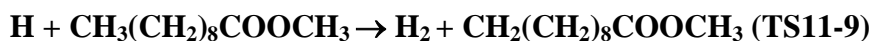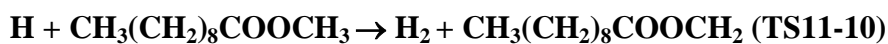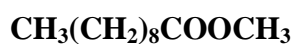

|   |         |         |         |
|---|---------|---------|---------|
| C | 0.0533  | -0.1229 | -0.1994 |
| H | 0.1304  | -0.2285 | 0.8908  |
| H | 1.0839  | -0.1291 | -0.5780 |
| C | -0.7089 | -1.3215 | -0.7748 |
| H | -1.7389 | -1.3195 | -0.4035 |
| H | -0.7831 | -1.2284 | -1.8629 |
| C | -0.0506 | -2.6562 | -0.4259 |
| H | 0.0276  | -2.7879 | 0.6590  |
| H | 0.9796  | -2.6970 | -0.7985 |
| C | -0.7799 | -3.8600 | -0.9815 |
| O | -0.1781 | -5.0082 | -0.5929 |
| O | -1.7638 | -3.8352 | -1.6798 |
| C | -0.7785 | -6.2283 | -1.0648 |
| H | -1.8066 | -6.3110 | -0.7094 |
| H | -0.7740 | -6.2601 | -2.1553 |
| H | -0.1669 | -7.0299 | -0.6563 |
| C | -0.5971 | 1.2253  | -0.5296 |
| H | -0.6720 | 1.3334  | -1.6192 |
| H | -1.6280 | 1.2299  | -0.1532 |
| C | 0.1578  | 2.4276  | 0.0482  |
| H | 0.2356  | 2.3158  | 1.1375  |
| H | 1.1880  | 2.4249  | -0.3311 |
| C | -0.4954 | 3.7763  | -0.2748 |
| H | -0.5707 | 3.8903  | -1.3640 |
| H | -1.5265 | 3.7774  | 0.1019  |

|   |         |        |         |
|---|---------|--------|---------|
| C | 0.2560  | 4.9783 | 0.3081  |
| H | 0.3329  | 4.8636 | 1.3974  |
| H | 1.2869  | 4.9795 | -0.0697 |
| C | -0.3980 | 6.3277 | -0.0106 |
| H | -0.4726 | 6.4439 | -1.0988 |
| H | -1.4283 | 6.3264 | 0.3656  |
| C | 0.3582  | 7.5219 | 0.5788  |
| H | -0.1333 | 8.4675 | 0.3335  |
| H | 0.4187  | 7.4525 | 1.6696  |
| H | 1.3821  | 7.5707 | 0.1945  |

**CH<sub>3</sub>(CH<sub>2</sub>)<sub>7</sub>CHCOOCH<sub>3</sub>**

|   |         |         |         |
|---|---------|---------|---------|
| C | 0.0641  | -0.0722 | -0.6020 |
| H | -0.0676 | -0.2409 | 0.4725  |
| H | 1.1454  | -0.0310 | -0.7800 |
| C | -0.5380 | -1.2697 | -1.3754 |
| H | -1.6120 | -1.3354 | -1.1857 |
| H | -0.4055 | -1.0799 | -2.4509 |
| C | 0.1007  | -2.5639 | -1.0317 |
| H | 1.1578  | -2.7195 | -1.2184 |
| C | -0.6371 | -3.6477 | -0.4181 |
| O | 0.1562  | -4.7328 | -0.1929 |
| O | -1.8215 | -3.6237 | -0.1273 |
| C | -0.4910 | -5.8622 | 0.4118  |
| H | -0.8927 | -5.5969 | 1.3915  |
| H | -1.3060 | -6.2219 | -0.2190 |
| H | 0.2808  | -6.6231 | 0.5091  |
| C | -0.5735 | 1.2645  | -0.9956 |
| H | -0.4458 | 1.4231  | -2.0743 |
| H | -1.6553 | 1.2133  | -0.8209 |
| C | 0.0072  | 2.4618  | -0.2347 |
| H | -0.1165 | 2.2993  | 0.8437  |
| H | 1.0893  | 2.5137  | -0.4119 |
| C | -0.6331 | 3.8003  | -0.6205 |
| H | -0.5107 | 3.9625  | -1.6993 |
| H | -1.7149 | 3.7476  | -0.4425 |
| C | -0.0544 | 4.9994  | 0.1390  |
| H | -0.1757 | 4.8375  | 1.2181  |
| H | 1.0276  | 5.0538  | -0.0393 |
| C | -0.6956 | 6.3381  | -0.2443 |
| H | -0.5743 | 6.5002  | -1.3223 |
| H | -1.7764 | 6.2841  | -0.0656 |
| C | -0.1119 | 7.5304  | 0.5193  |
| H | -0.5904 | 8.4680  | 0.2232  |
| H | -0.2494 | 7.4143  | 1.5991  |
| H | 0.9619  | 7.6325  | 0.3329  |

**TS11-1**

|   |         |         |         |
|---|---------|---------|---------|
| C | -0.0552 | -0.1224 | -0.3148 |
| H | -0.0919 | -0.1762 | 0.7803  |
| H | 1.0067  | -0.1742 | -0.5875 |
| C | -0.7941 | -1.3281 | -0.9066 |
| H | -1.8521 | -1.3032 | -0.6295 |
| H | -0.7728 | -1.2682 | -2.0033 |
| C | -0.2005 | -2.6587 | -0.4883 |
| H | -0.2650 | -2.7166 | 0.7587  |
| H | 0.8733  | -2.7537 | -0.6554 |
| C | -0.9411 | -3.8780 | -0.9343 |
| O | -0.1600 | -4.9801 | -0.8539 |
| O | -2.0961 | -3.9058 | -1.2916 |
| C | -0.7904 | -6.2261 | -1.2034 |
| H | -1.6341 | -6.4258 | -0.5412 |
| H | -1.1441 | -6.1989 | -2.2350 |
| H | -0.0204 | -6.9847 | -1.0821 |
| C | -0.6306 | 1.2208  | -0.7771 |
| H | -0.5910 | 1.2730  | -1.8728 |
| H | -1.6937 | 1.2699  | -0.5093 |
| C | 0.0972  | 2.4334  | -0.1864 |
| H | 0.0508  | 2.3849  | 0.9092  |
| H | 1.1621  | 2.3787  | -0.4475 |
| C | -0.4692 | 3.7777  | -0.6574 |
| H | -0.4226 | 3.8252  | -1.7532 |
| H | -1.5341 | 3.8328  | -0.3967 |
| C | 0.2584  | 4.9911  | -0.0683 |
| H | 0.2097  | 4.9464  | 1.0276  |
| H | 1.3242  | 4.9350  | -0.3264 |
| C | -0.3037 | 6.3362  | -0.5425 |
| H | -0.2552 | 6.3812  | -1.6374 |
| H | -1.3680 | 6.3933  | -0.2836 |
| C | 0.4306  | 7.5424  | 0.0502  |
| H | 0.0064  | 8.4847  | -0.3076 |
| H | 0.3694  | 7.5447  | 1.1432  |
| H | 1.4913  | 7.5318  | -0.2203 |
| H | -0.3128 | -2.7091 | 1.8020  |

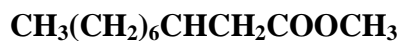

|   |         |         |         |
|---|---------|---------|---------|
| C | -4.2294 | -2.1083 | -0.3428 |
| H | -5.1211 | -1.5135 | -0.0877 |
| H | -3.7818 | -1.5767 | -1.2027 |
| C | -3.2752 | -2.1096 | 0.8027  |
| C | -2.9020 | -0.8389 | 1.4816  |
| H | -3.7809 | -0.3126 | 1.8823  |
| H | -2.4604 | -0.1141 | 0.7763  |
| C | -1.9073 | -1.0065 | 2.6134  |
| O | -1.7187 | 0.1674  | 3.2570  |
| O | -1.3393 | -2.0259 | 2.9168  |
| C | -0.7755 | 0.1475  | 4.3446  |
| H | -1.0990 | -0.5510 | 5.1175  |
| H | 0.2127  | -0.1462 | 3.9878  |
| H | -0.7566 | 1.1642  | 4.7308  |
| C | -4.6620 | -3.5088 | -0.7969 |
| H | -3.7681 | -4.0950 | -1.0430 |
| H | -5.1438 | -4.0240 | 0.0427  |
| C | -5.6089 | -3.4947 | -2.0012 |
| H | -6.4993 | -2.9009 | -1.7566 |
| H | -5.1212 | -2.9790 | -2.8387 |
| C | -6.0442 | -4.8928 | -2.4546 |
| H | -5.1535 | -5.4892 | -2.6913 |
| H | -6.5393 | -5.4060 | -1.6200 |
| C | -6.9809 | -4.8810 | -3.6677 |
| H | -6.4856 | -4.3678 | -4.5025 |
| H | -7.8724 | -4.2850 | -3.4322 |
| C | -7.4160 | -6.2784 | -4.1238 |
| H | -7.9144 | -6.7903 | -3.2916 |
| H | -6.5253 | -6.8747 | -4.3567 |
| C | -8.3471 | -6.2561 | -5.3396 |
| H | -7.8637 | -5.7810 | -6.1992 |
| H | -8.6382 | -7.2667 | -5.6395 |
| H | -9.2633 | -5.6965 | -5.1259 |
| H | -2.7520 | -3.0152 | 1.0850  |

**TS11-2**

|   |         |         |         |
|---|---------|---------|---------|
| C | -4.2553 | -2.1752 | -0.2645 |
| H | -5.1370 | -1.5657 | -0.0270 |
| H | -3.7498 | -1.6561 | -1.0940 |
| C | -3.3230 | -2.2085 | 0.9279  |
| H | -4.0253 | -2.7384 | 1.9108  |
| H | -2.5039 | -2.9231 | 0.8380  |
| C | -2.8713 | -0.8651 | 1.4562  |
| H | -3.7119 | -0.2690 | 1.8230  |
| H | -2.4202 | -0.2727 | 0.6459  |
| C | -1.8228 | -0.9619 | 2.5462  |
| O | -1.7793 | 0.1737  | 3.2755  |
| O | -1.0928 | -1.9030 | 2.7381  |
| C | -0.7820 | 0.2199  | 4.3140  |
| H | -0.9467 | -0.5815 | 5.0353  |
| H | 0.2172  | 0.1192  | 3.8881  |
| H | -0.9011 | 1.1922  | 4.7869  |
| H | -4.5827 | -3.0553 | 2.6305  |
| C | -4.7014 | -3.5636 | -0.7385 |
| H | -3.8138 | -4.1660 | -0.9687 |
| H | -5.2144 | -4.0771 | 0.0833  |
| C | -5.6189 | -3.5210 | -1.9652 |
| H | -6.5061 | -2.9174 | -1.7338 |
| H | -5.1043 | -3.0025 | -2.7848 |
| C | -6.0629 | -4.9074 | -2.4454 |
| H | -5.1754 | -5.5123 | -2.6718 |
| H | -6.5814 | -5.4242 | -1.6276 |
| C | -6.9746 | -4.8677 | -3.6768 |
| H | -6.4570 | -4.3488 | -4.4943 |
| H | -7.8639 | -4.2649 | -3.4507 |
| C | -7.4161 | -6.2536 | -4.1609 |
| H | -7.9355 | -6.7717 | -3.3455 |
| H | -6.5276 | -6.8563 | -4.3857 |
| C | -8.3240 | -6.2039 | -5.3933 |
| H | -7.8196 | -5.7224 | -6.2371 |
| H | -8.6203 | -7.2070 | -5.7127 |
| H | -9.2380 | -5.6373 | -5.1887 |

**CH<sub>3</sub>(CH<sub>2</sub>)<sub>5</sub>CH(CH<sub>2</sub>)<sub>2</sub>COOCH<sub>3</sub>**

|   |         |         |         |
|---|---------|---------|---------|
| C | -0.4445 | -0.1084 | -0.0996 |
| C | -1.0061 | -1.3527 | -0.7032 |
| H | -2.0579 | -1.4892 | -0.4008 |
| H | -1.0475 | -1.2581 | -1.7956 |
| C | -0.2211 | -2.6113 | -0.3281 |
| H | -0.1844 | -2.7415 | 0.7590  |
| H | 0.8228  | -2.5316 | -0.6496 |
| C | -0.7914 | -3.8798 | -0.9230 |
| O | -0.0623 | -4.9559 | -0.5487 |
| O | -1.7608 | -3.9558 | -1.6380 |
| C | -0.5071 | -6.2283 | -1.0543 |
| H | -1.5225 | -6.4398 | -0.7160 |
| H | -0.4851 | -6.2354 | -2.1450 |
| H | 0.1903  | -6.9601 | -0.6527 |
| C | -0.9069 | 1.2419  | -0.5353 |
| H | -0.9574 | 1.2769  | -1.6335 |
| H | -1.9489 | 1.4060  | -0.2032 |
| C | -0.0399 | 2.4002  | -0.0220 |
| H | 0.0007  | 2.3590  | 1.0738  |
| H | 0.9898  | 2.2583  | -0.3718 |
| C | -0.5423 | 3.7801  | -0.4595 |
| H | -0.5880 | 3.8174  | -1.5557 |
| H | -1.5730 | 3.9186  | -0.1081 |
| C | 0.3242  | 4.9377  | 0.0486  |
| H | 0.3696  | 4.9025  | 1.1451  |
| H | 1.3554  | 4.7994  | -0.3017 |
| C | -0.1750 | 6.3191  | -0.3901 |
| H | -0.2206 | 6.3544  | -1.4854 |
| H | -1.2049 | 6.4585  | -0.0392 |
| C | 0.6975  | 7.4693  | 0.1211  |
| H | 0.3149  | 8.4391  | -0.2093 |
| H | 0.7339  | 7.4821  | 1.2151  |
| H | 1.7261  | 7.3771  | -0.2419 |
| H | 0.1332  | -0.1861 | 0.8186  |

**TS11-3**

|   |         |         |         |
|---|---------|---------|---------|
| C | -0.0790 | -0.1230 | -0.2885 |
| H | -0.1717 | -0.1986 | 1.0247  |
| H | 1.0056  | -0.1665 | -0.4302 |
| C | -0.8013 | -1.3487 | -0.8087 |
| H | -1.8485 | -1.3283 | -0.4896 |
| H | -0.8291 | -1.3182 | -1.9059 |
| C | -0.1533 | -2.6580 | -0.3573 |
| H | -0.1319 | -2.7300 | 0.7352  |
| H | 0.8938  | -2.7108 | -0.6756 |
| C | -0.8548 | -3.8896 | -0.8870 |
| O | -0.2420 | -5.0144 | -0.4550 |
| O | -1.8288 | -3.8989 | -1.5997 |
| C | -0.8199 | -6.2584 | -0.8925 |
| H | -1.8496 | -6.3450 | -0.5427 |
| H | -0.8052 | -6.3248 | -1.9813 |
| H | -0.1999 | -7.0367 | -0.4530 |
| C | -0.6712 | 1.2226  | -0.6535 |
| H | -0.7138 | 1.3034  | -1.7506 |
| H | -1.7137 | 1.2647  | -0.3129 |
| C | 0.1058  | 2.4185  | -0.0898 |
| H | 0.1461  | 2.3394  | 1.0032  |
| H | 1.1452  | 2.3687  | -0.4387 |
| C | -0.4949 | 3.7734  | -0.4802 |
| H | -0.5411 | 3.8477  | -1.5745 |
| H | -1.5335 | 3.8234  | -0.1285 |
| C | 0.2843  | 4.9708  | 0.0747  |
| H | 0.3306  | 4.8973  | 1.1690  |
| H | 1.3235  | 4.9210  | -0.2764 |
| C | -0.3133 | 6.3278  | -0.3141 |
| H | -0.3610 | 6.4010  | -1.4075 |
| H | -1.3506 | 6.3793  | 0.0389  |
| C | 0.4738  | 7.5178  | 0.2425  |
| H | 0.0213  | 8.4692  | -0.0509 |
| H | 0.5105  | 7.4911  | 1.3362  |
| H | 1.5060  | 7.5148  | -0.1222 |
| H | -0.3051 | -0.2588 | 1.9819  |



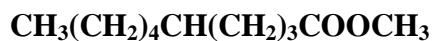

|   |         |         |         |
|---|---------|---------|---------|
| C | -0.0484 | -0.1822 | 0.2701  |
| H | -0.0749 | -0.3764 | 1.3590  |
| H | 1.0214  | -0.1978 | 0.0123  |
| C | -0.7736 | -1.3247 | -0.4537 |
| H | -1.8356 | -1.3126 | -0.1903 |
| H | -0.7287 | -1.1623 | -1.5345 |
| C | -0.1844 | -2.6941 | -0.1184 |
| H | -0.2198 | -2.8849 | 0.9607  |
| H | 0.8760  | -2.7476 | -0.3885 |
| C | -0.8909 | -3.8442 | -0.8024 |
| O | -0.2837 | -5.0193 | -0.5163 |
| O | -1.8659 | -3.7604 | -1.5083 |
| C | -0.8720 | -6.1946 | -1.1031 |
| H | -1.9013 | -6.3177 | -0.7628 |
| H | -0.8618 | -6.1247 | -2.1918 |
| H | -0.2562 | -7.0261 | -0.7674 |
| C | -0.6111 | 1.1701  | -0.0170 |
| C | 0.1040  | 2.4159  | 0.3876  |
| H | 0.1106  | 2.5044  | 1.4901  |
| H | 1.1662  | 2.3372  | 0.1106  |
| C | -0.4870 | 3.7030  | -0.2044 |
| H | -0.4750 | 3.6316  | -1.2987 |
| H | -1.5426 | 3.7784  | 0.0856  |
| C | 0.2517  | 4.9720  | 0.2324  |
| H | 0.2412  | 5.0396  | 1.3283  |
| H | 1.3083  | 4.8939  | -0.0560 |
| C | -0.3357 | 6.2595  | -0.3568 |
| H | -0.3278 | 6.1910  | -1.4514 |
| H | -1.3900 | 6.3411  | -0.0656 |
| C | 0.4130  | 7.5220  | 0.0803  |
| H | -0.0292 | 8.4211  | -0.3578 |
| H | 0.3916  | 7.6381  | 1.1686  |
| H | 1.4631  | 7.4851  | -0.2266 |
| H | -1.6482 | 1.2435  | -0.3346 |

**TS11-4**

|   |         |         |         |
|---|---------|---------|---------|
| C | 0.0016  | -0.1599 | 0.0277  |
| H | -0.0079 | -0.2348 | 1.1231  |
| H | 1.0621  | -0.2126 | -0.2647 |
| C | -0.7524 | -1.3464 | -0.5838 |
| H | -1.8100 | -1.2936 | -0.3084 |
| H | -0.7212 | -1.2824 | -1.6756 |
| C | -0.1788 | -2.6918 | -0.1403 |
| H | -0.2357 | -2.8110 | 0.9469  |
| H | 0.8873  | -2.7646 | -0.3869 |
| C | -0.8656 | -3.8819 | -0.7746 |
| O | -0.4009 | -5.0399 | -0.2521 |
| O | -1.7089 | -3.8378 | -1.6365 |
| C | -0.9673 | -6.2491 | -0.7902 |
| H | -2.0448 | -6.2744 | -0.6214 |
| H | -0.7717 | -6.3194 | -1.8612 |
| H | -0.4774 | -7.0613 | -0.2576 |
| C | -0.5519 | 1.1886  | -0.3857 |
| H | -0.7647 | 1.2549  | -1.4570 |
| H | -1.7654 | 1.2297  | 0.1259  |
| C | 0.1485  | 2.4161  | 0.1599  |
| H | 0.1645  | 2.3685  | 1.2566  |
| H | 1.2035  | 2.3904  | -0.1543 |
| C | -0.4780 | 3.7418  | -0.2894 |
| H | -0.4863 | 3.7819  | -1.3861 |
| H | -1.5281 | 3.7685  | 0.0251  |
| C | 0.2481  | 4.9758  | 0.2567  |
| H | 0.2564  | 4.9359  | 1.3538  |
| H | 1.3003  | 4.9466  | -0.0558 |
| C | -0.3742 | 6.3025  | -0.1935 |
| H | -0.3838 | 6.3425  | -1.2896 |
| H | -1.4246 | 6.3321  | 0.1203  |
| C | 0.3569  | 7.5312  | 0.3552  |
| H | -0.1120 | 8.4594  | 0.0169  |
| H | 0.3534  | 7.5375  | 1.4498  |
| H | 1.4016  | 7.5489  | 0.0287  |
| H | -2.6247 | 1.2521  | 0.5707  |

**CH<sub>3</sub>(CH<sub>2</sub>)<sub>3</sub>CH(CH<sub>2</sub>)<sub>4</sub>COOCH<sub>3</sub>**

|   |         |         |         |
|---|---------|---------|---------|
| C | -0.0260 | -0.0919 | -0.2922 |
| H | -0.0379 | -0.0568 | 0.8040  |
| H | 1.0298  | -0.1577 | -0.5847 |
| C | -0.7715 | -1.3394 | -0.7766 |
| H | -1.8259 | -1.2784 | -0.4889 |
| H | -0.7617 | -1.3775 | -1.8708 |
| C | -0.1727 | -2.6318 | -0.2222 |
| H | -0.1780 | -2.6301 | 0.8740  |
| H | 0.8799  | -2.7362 | -0.5076 |
| C | -0.8967 | -3.8808 | -0.6758 |
| O | -0.2872 | -4.9906 | -0.1983 |
| O | -1.8856 | -3.9173 | -1.3665 |
| C | -0.8890 | -6.2474 | -0.5589 |
| H | -1.9119 | -6.3035 | -0.1834 |
| H | -0.8994 | -6.3691 | -1.6430 |
| H | -0.2686 | -7.0105 | -0.0941 |
| C | -0.6164 | 1.2149  | -0.8401 |
| H | -0.6269 | 1.1606  | -1.9447 |
| C | 0.1047  | 2.4447  | -0.3979 |
| C | -0.4711 | 3.8065  | -0.6021 |
| H | -0.4687 | 4.0578  | -1.6794 |
| H | -1.5348 | 3.8020  | -0.3213 |
| C | 0.2575  | 4.9210  | 0.1617  |
| H | 0.2383  | 4.6922  | 1.2342  |
| H | 1.3152  | 4.9249  | -0.1312 |
| C | -0.3373 | 6.3137  | -0.0723 |
| H | -0.3199 | 6.5383  | -1.1458 |
| H | -1.3948 | 6.3078  | 0.2192  |
| C | 0.3954  | 7.4201  | 0.6920  |
| H | -0.0535 | 8.3997  | 0.5057  |
| H | 0.3660  | 7.2413  | 1.7715  |
| H | 1.4477  | 7.4754  | 0.3955  |
| H | -1.6765 | 1.2869  | -0.5562 |
| H | 1.1555  | 2.3613  | -0.1300 |

**TS11-5**

|   |         |         |         |
|---|---------|---------|---------|
| C | -0.0534 | -0.1280 | -0.1292 |
| H | -0.0541 | -0.1734 | 0.9666  |
| H | 1.0002  | -0.1590 | -0.4358 |
| C | -0.7875 | -1.3483 | -0.6946 |
| H | -1.8392 | -1.3226 | -0.3925 |
| H | -0.7892 | -1.3087 | -1.7888 |
| C | -0.1646 | -2.6674 | -0.2385 |
| H | -0.1603 | -2.7446 | 0.8547  |
| H | 0.8872  | -2.7340 | -0.5388 |
| C | -0.8715 | -3.8919 | -0.7778 |
| O | -0.2624 | -5.0237 | -0.3554 |
| O | -1.8470 | -3.8934 | -1.4883 |
| C | -0.8472 | -6.2613 | -0.8008 |
| H | -1.8758 | -6.3471 | -0.4474 |
| H | -0.8379 | -6.3186 | -1.8902 |
| H | -0.2285 | -7.0460 | -0.3710 |
| C | -0.6674 | 1.2040  | -0.5765 |
| H | -0.6649 | 1.2520  | -1.6763 |
| C | 0.0484  | 2.4232  | -0.0323 |
| H | -0.0932 | 2.3478  | 1.2767  |
| H | 1.1366  | 2.3639  | -0.1346 |
| C | -0.5109 | 3.7784  | -0.4139 |
| H | -0.5067 | 3.8660  | -1.5116 |
| H | -1.5663 | 3.8326  | -0.1166 |
| C | 0.2558  | 4.9619  | 0.1883  |
| H | 0.2486  | 4.8776  | 1.2818  |
| H | 1.3088  | 4.9017  | -0.1159 |
| C | -0.3099 | 6.3269  | -0.2188 |
| H | -0.3052 | 6.4087  | -1.3127 |
| H | -1.3619 | 6.3865  | 0.0857  |
| C | 0.4624  | 7.5040  | 0.3839  |
| H | 0.0342  | 8.4620  | 0.0764  |
| H | 0.4464  | 7.4688  | 1.4778  |
| H | 1.5106  | 7.4924  | 0.0688  |
| H | -1.7237 | 1.2403  | -0.2806 |
| H | -0.2645 | 2.2944  | 2.2274  |

**CH<sub>3</sub>(CH<sub>2</sub>)<sub>2</sub>CH(CH<sub>2</sub>)<sub>5</sub>COOCH<sub>3</sub>**

|   |         |         |         |
|---|---------|---------|---------|
| C | 0.0591  | -0.1556 | -0.0262 |
| H | 0.0241  | -0.1993 | 1.0704  |
| H | 1.1179  | -0.2532 | -0.2999 |
| C | -0.7289 | -1.3336 | -0.6092 |
| H | -1.7861 | -1.2434 | -0.3401 |
| H | -0.6945 | -1.2987 | -1.7028 |
| C | -0.2004 | -2.6858 | -0.1312 |
| H | -0.2407 | -2.7629 | 0.9613  |
| H | 0.8566  | -2.8117 | -0.3924 |
| C | -0.9523 | -3.8696 | -0.6998 |
| O | -0.4423 | -5.0327 | -0.2324 |
| O | -1.8821 | -3.8187 | -1.4673 |
| C | -1.0742 | -6.2361 | -0.7060 |
| H | -2.1280 | -6.2515 | -0.4242 |
| H | -0.9938 | -6.3084 | -1.7916 |
| H | -0.5383 | -7.0531 | -0.2276 |
| C | -0.4599 | 1.2081  | -0.4934 |
| H | -0.4266 | 1.2527  | -1.5891 |
| C | 0.3289  | 2.3930  | 0.0807  |
| H | 1.3958  | 2.2695  | -0.1838 |
| C | -0.1556 | 3.7289  | -0.3761 |
| C | 0.3460  | 4.9957  | 0.2328  |
| H | 0.3762  | 4.8932  | 1.3280  |
| H | 1.3998  | 5.1626  | -0.0601 |
| C | -0.4675 | 6.2425  | -0.1431 |
| H | -0.4922 | 6.3356  | -1.2353 |
| H | -1.5062 | 6.0997  | 0.1752  |
| C | 0.0871  | 7.5317  | 0.4680  |
| H | -0.5137 | 8.3993  | 0.1816  |
| H | 0.0950  | 7.4805  | 1.5614  |
| H | 1.1148  | 7.7162  | 0.1388  |
| H | -1.5154 | 1.3118  | -0.2152 |
| H | 0.3101  | 2.3504  | 1.1803  |
| H | -0.7170 | 3.7875  | -1.3056 |

**TS11-6**

|   |         |         |         |
|---|---------|---------|---------|
| C | -0.0271 | -0.1493 | 0.0072  |
| H | -0.0654 | -0.2128 | 1.1026  |
| H | 1.0361  | -0.1995 | -0.2628 |
| C | -0.7645 | -1.3478 | -0.5998 |
| H | -1.8259 | -1.3034 | -0.3358 |
| H | -0.7255 | -1.2938 | -1.6924 |
| C | -0.1856 | -2.6856 | -0.1401 |
| H | -0.2277 | -2.7813 | 0.9508  |
| H | 0.8766  | -2.7663 | -0.3982 |
| C | -0.8887 | -3.8884 | -0.7308 |
| O | -0.3388 | -5.0381 | -0.2759 |
| O | -1.8144 | -3.8610 | -1.5044 |
| C | -0.9232 | -6.2575 | -0.7695 |
| H | -1.9763 | -6.3171 | -0.4909 |
| H | -0.8376 | -6.3104 | -1.8558 |
| H | -0.3577 | -7.0606 | -0.3017 |
| C | -0.5995 | 1.2002  | -0.4394 |
| H | -0.5689 | 1.2621  | -1.5345 |
| C | 0.1437  | 2.4031  | 0.1539  |
| H | 1.2044  | 2.3526  | -0.1373 |
| C | -0.4166 | 3.7441  | -0.2745 |
| H | -0.6195 | 3.8014  | -1.3485 |
| H | -1.6356 | 3.7796  | 0.2237  |
| C | 0.2674  | 4.9821  | 0.2680  |
| H | 0.2761  | 4.9419  | 1.3652  |
| H | 1.3251  | 4.9655  | -0.0382 |
| C | -0.3676 | 6.3000  | -0.1925 |
| H | -0.3667 | 6.3350  | -1.2885 |
| H | -1.4197 | 6.3170  | 0.1130  |
| C | 0.3470  | 7.5365  | 0.3594  |
| H | -0.1284 | 8.4583  | 0.0137  |
| H | 0.3324  | 7.5463  | 1.4538  |
| H | 1.3946  | 7.5640  | 0.0428  |
| H | -1.6581 | 1.2562  | -0.1597 |
| H | 0.1337  | 2.3395  | 1.2499  |
| H | -2.5020 | 3.7994  | 0.6562  |

**CH<sub>3</sub>CH<sub>2</sub>CH(CH<sub>2</sub>)<sub>6</sub>COOCH<sub>3</sub>**

|   |         |         |         |
|---|---------|---------|---------|
| C | -0.0187 | -0.1221 | -0.0656 |
| H | -0.0093 | -0.1474 | 1.0319  |
| H | 1.0322  | -0.1757 | -0.3790 |
| C | -0.7730 | -1.3455 | -0.5975 |
| H | -1.8208 | -1.3021 | -0.2837 |
| H | -0.7876 | -1.3261 | -1.6920 |
| C | -0.1595 | -2.6635 | -0.1252 |
| H | -0.1396 | -2.7195 | 0.9694  |
| H | 0.8867  | -2.7491 | -0.4394 |
| C | -0.8896 | -3.8899 | -0.6277 |
| O | -0.2720 | -5.0207 | -0.2137 |
| O | -1.8887 | -3.8946 | -1.3046 |
| C | -0.8778 | -6.2596 | -0.6259 |
| H | -1.8947 | -6.3359 | -0.2380 |
| H | -0.9048 | -6.3285 | -1.7144 |
| H | -0.2494 | -7.0433 | -0.2084 |
| C | -0.6168 | 1.2091  | -0.5339 |
| H | -0.6234 | 1.2361  | -1.6311 |
| C | 0.1302  | 2.4358  | -0.0004 |
| H | 1.1806  | 2.3871  | -0.3144 |
| C | -0.4704 | 3.7696  | -0.4671 |
| H | -0.5016 | 3.7741  | -1.5728 |
| C | 0.2594  | 4.9747  | 0.0256  |
| C | -0.3270 | 6.3437  | -0.0745 |
| H | -0.3811 | 6.6514  | -1.1348 |
| H | -1.3740 | 6.3195  | 0.2601  |
| C | 0.4439  | 7.4112  | 0.7111  |
| H | -0.0114 | 8.3979  | 0.5920  |
| H | 0.4626  | 7.1749  | 1.7788  |
| H | 1.4804  | 7.4788  | 0.3670  |
| H | -1.6682 | 1.2612  | -0.2232 |
| H | 0.1375  | 2.4117  | 1.0959  |
| H | -1.5250 | 3.8265  | -0.1595 |
| H | 1.3187  | 4.8809  | 0.2541  |

**TS11-7**

|   |         |         |         |
|---|---------|---------|---------|
| C | -0.0163 | -0.1393 | -0.0290 |
| H | 0.0137  | -0.1960 | 1.0669  |
| H | 1.0288  | -0.1786 | -0.3632 |
| C | -0.7749 | -1.3504 | -0.5824 |
| H | -1.8178 | -1.3191 | -0.2511 |
| H | -0.8067 | -1.3017 | -1.6756 |
| C | -0.1500 | -2.6782 | -0.1549 |
| H | -0.1162 | -2.7659 | 0.9370  |
| H | 0.8928  | -2.7491 | -0.4843 |
| C | -0.8784 | -3.8934 | -0.6865 |
| O | -0.2746 | -5.0331 | -0.2771 |
| O | -1.8645 | -3.8828 | -1.3822 |
| C | -0.8776 | -6.2629 | -0.7197 |
| H | -1.9027 | -6.3396 | -0.3541 |
| H | -0.8823 | -6.3162 | -1.8094 |
| H | -0.2618 | -7.0556 | -0.3006 |
| C | -0.6292 | 1.2019  | -0.4470 |
| H | -0.6591 | 1.2600  | -1.5426 |
| C | 0.1248  | 2.4160  | 0.1060  |
| H | 1.1690  | 2.3794  | -0.2305 |
| C | -0.4909 | 3.7573  | -0.3107 |
| H | -0.5177 | 3.8173  | -1.4099 |
| C | 0.2469  | 4.9666  | 0.2257  |
| H | 0.1400  | 4.8811  | 1.5375  |
| H | 1.3317  | 4.9025  | 0.0937  |
| C | -0.3135 | 6.3296  | -0.1262 |
| H | -0.3369 | 6.4285  | -1.2217 |
| H | -1.3596 | 6.3856  | 0.1990  |
| C | 0.4798  | 7.4951  | 0.4728  |
| H | 0.0457  | 8.4569  | 0.1873  |
| H | 0.4907  | 7.4438  | 1.5651  |
| H | 1.5186  | 7.4830  | 0.1286  |
| H | -1.6737 | 1.2411  | -0.1124 |
| H | 0.1543  | 2.3589  | 1.2006  |
| H | -1.5388 | 3.7985  | 0.0139  |
| H | -0.0070 | 4.8221  | 2.4922  |



**CH<sub>3</sub>CH(CH<sub>2</sub>)<sub>7</sub>COOCH<sub>3</sub>**

|   |         |         |         |
|---|---------|---------|---------|
| C | -0.0097 | -0.1506 | -0.0219 |
| H | 0.0307  | -0.2124 | 1.0736  |
| H | 1.0315  | -0.1995 | -0.3667 |
| C | -0.7859 | -1.3521 | -0.5722 |
| H | -1.8246 | -1.3129 | -0.2291 |
| H | -0.8296 | -1.2975 | -1.6647 |
| C | -0.1681 | -2.6875 | -0.1585 |
| H | -0.1223 | -2.7805 | 0.9327  |
| H | 0.8701  | -2.7663 | -0.5003 |
| C | -0.9137 | -3.8941 | -0.6859 |
| O | -0.3073 | -5.0406 | -0.2992 |
| O | -1.9142 | -3.8726 | -1.3603 |
| C | -0.9261 | -6.2632 | -0.7398 |
| H | -1.9434 | -6.3382 | -0.3529 |
| H | -0.9545 | -6.3066 | -1.8295 |
| H | -0.3055 | -7.0628 | -0.3412 |
| C | -0.6124 | 1.1987  | -0.4288 |
| H | -0.6531 | 1.2605  | -1.5238 |
| C | 0.1605  | 2.4043  | 0.1177  |
| H | 1.2017  | 2.3530  | -0.2268 |
| C | -0.4411 | 3.7531  | -0.2901 |
| H | -0.4770 | 3.8188  | -1.3849 |
| C | 0.3323  | 4.9602  | 0.2583  |
| H | 1.3873  | 4.8810  | -0.0655 |
| C | -0.2246 | 6.2831  | -0.1507 |
| C | 0.2315  | 7.5485  | 0.4913  |
| H | -0.3972 | 8.3981  | 0.2139  |
| H | 0.2318  | 7.4687  | 1.5859  |
| H | 1.2657  | 7.8070  | 0.2058  |
| H | -1.6529 | 1.2485  | -0.0836 |
| H | 0.2001  | 2.3419  | 1.2131  |
| H | -1.4810 | 3.8089  | 0.0536  |
| H | 0.3751  | 4.9033  | 1.3564  |
| H | -0.8088 | 6.3387  | -1.0647 |

**TS11-8**

|   |         |         |         |
|---|---------|---------|---------|
| C | -0.0318 | -0.1468 | -0.0033 |
| H | -0.0318 | -0.2094 | 1.0928  |
| H | 1.0218  | -0.1887 | -0.3093 |
| C | -0.7797 | -1.3524 | -0.5829 |
| H | -1.8305 | -1.3202 | -0.2778 |
| H | -0.7839 | -1.2966 | -1.6762 |
| C | -0.1690 | -2.6845 | -0.1484 |
| H | -0.1602 | -2.7771 | 0.9438  |
| H | 0.8806  | -2.7580 | -0.4545 |
| C | -0.8909 | -3.8948 | -0.6998 |
| O | -0.2862 | -5.0380 | -0.3012 |
| O | -1.8736 | -3.8783 | -1.3999 |
| C | -0.8854 | -6.2638 | -0.7599 |
| H | -1.9107 | -6.3478 | -0.3963 |
| H | -0.8889 | -6.3035 | -1.8501 |
| H | -0.2680 | -7.0601 | -0.3499 |
| C | -0.6279 | 1.1989  | -0.4313 |
| H | -0.6282 | 1.2616  | -1.5270 |
| C | 0.1160  | 2.4088  | 0.1448  |
| H | 1.1693  | 2.3660  | -0.1622 |
| C | -0.4816 | 3.7540  | -0.2821 |
| H | -0.4843 | 3.8185  | -1.3777 |
| C | 0.2675  | 4.9628  | 0.2910  |
| H | 1.3213  | 4.9196  | -0.0267 |
| C | -0.3098 | 6.3009  | -0.1226 |
| H | -0.5331 | 6.3595  | -1.1916 |
| H | -1.5189 | 6.3342  | 0.3903  |
| C | 0.3815  | 7.5364  | 0.4107  |
| H | -0.1572 | 8.4477  | 0.1382  |
| H | 0.4642  | 7.5058  | 1.5015  |
| H | 1.3985  | 7.6206  | 0.0070  |
| H | -1.6808 | 1.2416  | -0.1249 |
| H | 0.1164  | 2.3451  | 1.2407  |
| H | -1.5319 | 3.8008  | 0.0292  |
| H | 0.2864  | 4.9008  | 1.3870  |
| H | -2.3887 | 6.3715  | 0.8189  |

**CH<sub>2</sub>(CH<sub>2</sub>)<sub>8</sub>COOCH<sub>3</sub>**

|   |         |         |         |
|---|---------|---------|---------|
| C | 0.0092  | -0.0004 | 0.0032  |
| H | 0.0143  | -0.0041 | 1.1011  |
| H | 1.0631  | 0.0008  | -0.3047 |
| C | -0.6706 | -1.2753 | -0.5079 |
| H | -1.7212 | -1.2854 | -0.2009 |
| H | -0.6792 | -1.2783 | -1.6027 |
| C | 0.0131  | -2.5469 | -0.0060 |
| H | 0.0295  | -2.5798 | 1.0896  |
| H | 1.0643  | -2.5799 | -0.3133 |
| C | -0.6446 | -3.8221 | -0.4870 |
| O | 0.0289  | -4.9084 | -0.0423 |
| O | -1.6353 | -3.8957 | -1.1721 |
| C | -0.5059 | -6.1869 | -0.4311 |
| H | -1.5206 | -6.3090 | -0.0494 |
| H | -0.5195 | -6.2813 | -1.5179 |
| H | 0.1598  | -6.9263 | 0.0089  |
| C | -0.6624 | 1.2848  | -0.4937 |
| H | -0.6668 | 1.2886  | -1.5911 |
| H | -1.7160 | 1.2833  | -0.1866 |
| C | 0.0111  | 2.5646  | 0.0143  |
| H | 0.0146  | 2.5607  | 1.1120  |
| H | 1.0651  | 2.5652  | -0.2923 |
| C | -0.6600 | 3.8496  | -0.4837 |
| H | -0.6641 | 3.8537  | -1.5814 |
| H | -1.7140 | 3.8489  | -0.1767 |
| C | 0.0136  | 5.1285  | 0.0244  |
| H | 0.0191  | 5.1297  | 1.1209  |
| H | 1.0659  | 5.1346  | -0.2870 |
| C | -0.6615 | 6.4158  | -0.4741 |
| H | -0.6908 | 6.3883  | -1.5787 |
| H | -1.7156 | 6.4250  | -0.1669 |
| C | 0.0079  | 7.6664  | -0.0204 |
| H | 1.0752  | 7.6857  | 0.1705  |
| H | -0.5250 | 8.6093  | 0.0036  |

**TS11-9**

|   |         |         |         |
|---|---------|---------|---------|
| C | 0.0211  | 0.0016  | -0.0097 |
| H | 0.0467  | 0.0012  | 1.0879  |
| H | 1.0691  | -0.0009 | -0.3372 |
| C | -0.6713 | -1.2729 | -0.5046 |
| H | -1.7167 | -1.2781 | -0.1800 |
| H | -0.6982 | -1.2802 | -1.5990 |
| C | 0.0165  | -2.5448 | -0.0091 |
| H | 0.0473  | -2.5765 | 1.0861  |
| H | 1.0636  | -2.5797 | -0.3303 |
| C | -0.6480 | -3.8196 | -0.4817 |
| O | 0.0155  | -4.9066 | -0.0239 |
| O | -1.6351 | -3.8923 | -1.1722 |
| C | -0.5242 | -6.1847 | -0.4070 |
| H | -1.5431 | -6.2972 | -0.0333 |
| H | -0.5288 | -6.2879 | -1.4930 |
| H | 0.1328  | -6.9247 | 0.0449  |
| C | -0.6564 | 1.2870  | -0.4977 |
| H | -0.6831 | 1.2868  | -1.5949 |
| H | -1.7035 | 1.2901  | -0.1693 |
| C | 0.0312  | 2.5666  | -0.0083 |
| H | 0.0582  | 2.5662  | 1.0890  |
| H | 1.0784  | 2.5634  | -0.3375 |
| C | -0.6475 | 3.8517  | -0.4956 |
| H | -0.6754 | 3.8523  | -1.5931 |
| H | -1.6943 | 3.8548  | -0.1656 |
| C | 0.0399  | 5.1306  | -0.0058 |
| H | 0.0673  | 5.1335  | 1.0905  |
| H | 1.0861  | 5.1316  | -0.3376 |
| C | -0.6417 | 6.4153  | -0.4938 |
| H | -0.6714 | 6.4110  | -1.5943 |
| H | -1.6903 | 6.4225  | -0.1716 |
| C | 0.0380  | 7.6803  | -0.0285 |
| H | -0.4405 | 8.6142  | -0.3218 |
| H | -0.0923 | 7.7286  | 1.3309  |
| H | 1.1210  | 7.7118  | -0.1528 |
| H | -0.2131 | 7.7453  | 2.2491  |

**CH<sub>3</sub>(CH<sub>2</sub>)<sub>8</sub>COOCH<sub>2</sub>**

|   |          |         |         |
|---|----------|---------|---------|
| C | -4.2299  | -2.6052 | -0.1926 |
| H | -4.7446  | -1.6467 | -0.3395 |
| H | -3.4725  | -2.6676 | -0.9849 |
| C | -3.5395  | -2.6085 | 1.1757  |
| H | -4.2898  | -2.5461 | 1.9704  |
| H | -3.0195  | -3.5596 | 1.3280  |
| C | -2.5436  | -1.4593 | 1.3324  |
| H | -3.0335  | -0.4880 | 1.1979  |
| H | -1.7663  | -1.5016 | 0.5604  |
| C | -1.8525  | -1.4402 | 2.6729  |
| O | -0.9959  | -0.3630 | 2.7515  |
| O | -1.9910  | -2.2236 | 3.5737  |
| C | -0.2753  | -0.1806 | 3.8946  |
| C | -5.2355  | -3.7491 | -0.3643 |
| H | -5.9903  | -3.6877 | 0.4300  |
| H | -4.7205  | -4.7074 | -0.2196 |
| C | -5.9353  | -3.7514 | -1.7281 |
| H | -6.4484  | -2.7918 | -1.8728 |
| H | -5.1805  | -3.8147 | -2.5227 |
| C | -6.9436  | -4.8936 | -1.8971 |
| H | -6.4302  | -5.8532 | -1.7540 |
| H | -7.6966  | -4.8310 | -1.1009 |
| C | -7.6478  | -4.8963 | -3.2586 |
| H | -8.1604  | -3.9361 | -3.4032 |
| H | -6.8959  | -4.9613 | -4.0560 |
| C | -8.6587  | -6.0365 | -3.4260 |
| H | -8.1469  | -6.9959 | -3.2823 |
| H | -9.4101  | -5.9712 | -2.6297 |
| C | -9.3578  | -6.0312 | -4.7886 |
| H | -10.0700 | -6.8565 | -4.8763 |
| H | -9.9091  | -5.0989 | -4.9469 |
| H | -8.6346  | -6.1290 | -5.6046 |
| H | 0.3617   | 0.6870  | 3.8782  |
| H | -0.3989  | -0.8760 | 4.7086  |

**TS11-10**

|   |          |         |         |
|---|----------|---------|---------|
| C | -4.2408  | -2.5874 | -0.2010 |
| H | -4.7904  | -1.6427 | -0.3039 |
| H | -3.5014  | -2.5987 | -1.0123 |
| C | -3.5181  | -2.6119 | 1.1503  |
| H | -4.2509  | -2.6049 | 1.9634  |
| H | -2.9606  | -3.5479 | 1.2571  |
| C | -2.5619  | -1.4322 | 1.3260  |
| H | -3.0902  | -0.4761 | 1.2364  |
| H | -1.7998  | -1.4176 | 0.5382  |
| C | -1.8445  | -1.4286 | 2.6542  |
| O | -1.0094  | -0.3455 | 2.7430  |
| O | -1.9540  | -2.2406 | 3.5345  |
| C | -0.2914  | -0.1791 | 3.9320  |
| H | -0.0178  | -1.1134 | 4.4170  |
| H | 0.5181   | 0.5239  | 3.7589  |
| H | -1.0746  | 0.4243  | 4.8147  |
| H | -1.6635  | 0.8703  | 5.4298  |
| C | -5.2122  | -3.7586 | -0.3862 |
| H | -5.9486  | -3.7474 | 0.4273  |
| H | -4.6627  | -4.7032 | -0.2847 |
| C | -5.9453  | -3.7417 | -1.7323 |
| H | -6.4912  | -2.7948 | -1.8348 |
| H | -5.2093  | -3.7575 | -2.5465 |
| C | -6.9222  | -4.9094 | -1.9114 |
| H | -6.3762  | -5.8564 | -1.8110 |
| H | -7.6556  | -4.8945 | -1.0949 |
| C | -7.6616  | -4.8932 | -3.2539 |
| H | -8.2066  | -3.9456 | -3.3560 |
| H | -6.9295  | -4.9112 | -4.0720 |
| C | -8.6417  | -6.0587 | -3.4302 |
| H | -8.0973  | -7.0057 | -3.3306 |
| H | -9.3723  | -6.0414 | -2.6123 |
| C | -9.3786  | -6.0333 | -4.7726 |
| H | -10.0672 | -6.8776 | -4.8672 |
| H | -9.9624  | -5.1143 | -4.8860 |
| H | -8.6759  | -6.0828 | -5.6105 |

---

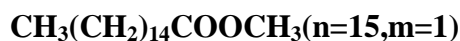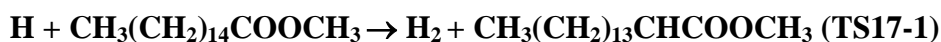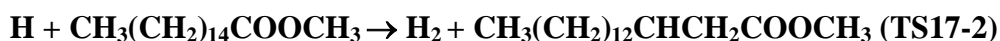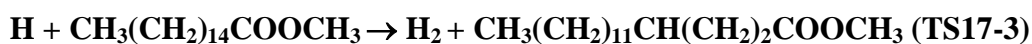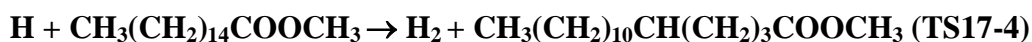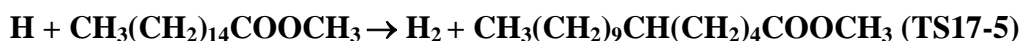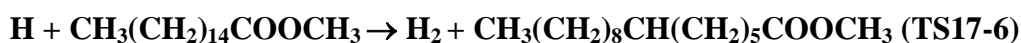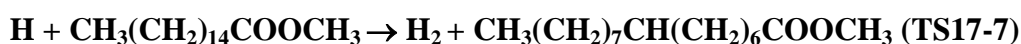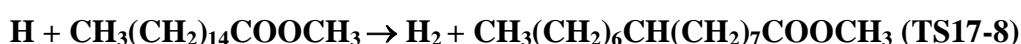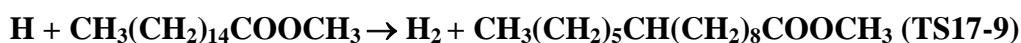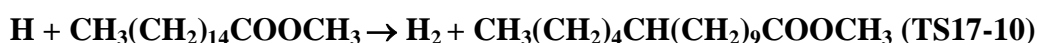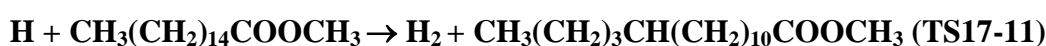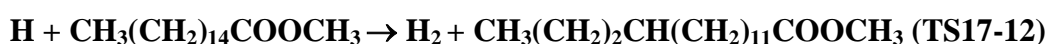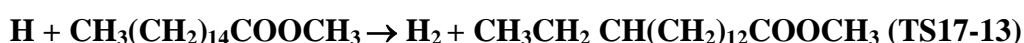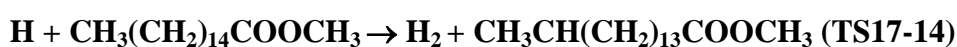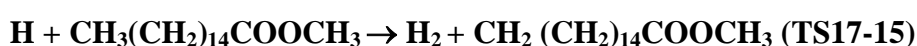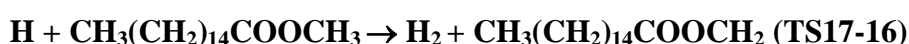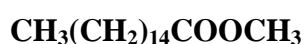

|   |         |         |         |
|---|---------|---------|---------|
| C | -0.5093 | -0.0822 | 0.1951  |
| H | -0.5593 | -0.1116 | 1.2915  |
| H | 0.5527  | -0.1882 | -0.0627 |
| C | -1.2954 | -1.2642 | -0.3824 |
| H | -2.3545 | -1.1693 | -0.1228 |
| H | -1.2521 | -1.2405 | -1.4762 |
| C | -0.7737 | -2.6125 | 0.1139  |
| H | -0.8103 | -2.6703 | 1.2080  |
| H | 0.2809  | -2.7511 | -0.1489 |
| C | -1.5402 | -3.8000 | -0.4266 |
| O | -0.9988 | -4.9609 | 0.0102  |
| O | -2.5068 | -3.7537 | -1.1476 |
| C | -1.6469 | -6.1674 | -0.4327 |
| H | -2.6824 | -6.1933 | -0.0903 |

|   |         |         |         |
|---|---------|---------|---------|
| H | -1.6292 | -6.2336 | -1.5215 |
| H | -1.0775 | -6.9821 | 0.0094  |
| C | -1.0131 | 1.2798  | -0.2958 |
| H | -0.9570 | 1.3121  | -1.3914 |
| H | -2.0762 | 1.3836  | -0.0437 |
| C | -0.2368 | 2.4661  | 0.2867  |
| H | -0.2966 | 2.4340  | 1.3824  |
| H | 0.8272  | 2.3598  | 0.0381  |
| C | -0.7361 | 3.8292  | -0.2059 |
| H | -0.6695 | 3.8645  | -1.3011 |
| H | -1.8018 | 3.9327  | 0.0362  |
| C | 0.0335  | 5.0153  | 0.3861  |
| H | -0.0363 | 4.9805  | 1.4811  |
| H | 1.0999  | 4.9103  | 0.1471  |
| C | -0.4622 | 6.3792  | -0.1078 |
| H | -0.3857 | 6.4173  | -1.2022 |
| H | -1.5301 | 6.4815  | 0.1249  |
| C | 0.3011  | 7.5646  | 0.4939  |
| H | 0.2221  | 7.5268  | 1.5882  |
| H | 1.3696  | 7.4612  | 0.2638  |
| C | -0.1917 | 8.9294  | -0.0005 |
| H | -1.2614 | 9.0305  | 0.2244  |
| H | -0.1070 | 8.9700  | -1.0943 |
| C | 0.5664  | 10.1139 | 0.6092  |
| H | 0.4801  | 10.0734 | 1.7029  |
| H | 1.6365  | 10.0121 | 0.3861  |
| C | 0.0757  | 11.4795 | 0.1148  |
| H | -0.9952 | 11.5799 | 0.3348  |
| H | 0.1656  | 11.5220 | -0.9785 |
| C | 0.8302  | 12.6633 | 0.7297  |
| H | 0.7399  | 12.6218 | 1.8232  |
| H | 1.9015  | 12.5638 | 0.5107  |
| C | 0.3412  | 14.0299 | 0.2364  |
| H | -0.7291 | 14.1299 | 0.4547  |
| H | 0.4331  | 14.0728 | -0.8558 |
| C | 1.1003  | 15.2057 | 0.8583  |
| H | 0.9986  | 15.2097 | 1.9483  |
| H | 2.1690  | 15.1531 | 0.6273  |
| H | 0.7276  | 16.1645 | 0.4869  |



**CH<sub>3</sub>(CH<sub>2</sub>)<sub>13</sub>CHCOOCH<sub>3</sub>**

|   |          |         |          |
|---|----------|---------|----------|
| C | -3.4529  | -2.5815 | -0.3434  |
| H | -4.3473  | -2.1044 | 0.0718   |
| H | -3.0435  | -1.8851 | -1.0849  |
| C | -2.4218  | -2.7859 | 0.7945   |
| H | -2.8360  | -3.4600 | 1.5481   |
| H | -1.5330  | -3.2697 | 0.3659   |
| C | -2.0189  | -1.5131 | 1.4419   |
| C | -2.4064  | -1.1858 | 2.7978   |
| O | -1.9386  | 0.0378  | 3.1743   |
| O | -3.0689  | -1.8956 | 3.5361   |
| C | -2.2740  | 0.4492  | 4.5077   |
| H | -3.3570  | 0.5067  | 4.6320   |
| H | -1.8707  | -0.2527 | 5.2399   |
| H | -1.8229  | 1.4316  | 4.6320   |
| C | -3.8418  | -3.8953 | -1.0302  |
| H | -2.9413  | -4.3728 | -1.4375  |
| H | -4.2430  | -4.5887 | -0.2807  |
| C | -4.8699  | -3.7093 | -2.1518  |
| H | -4.4644  | -3.0216 | -2.9051  |
| H | -5.7638  | -3.2204 | -1.7440  |
| C | -5.2792  | -5.0209 | -2.8323  |
| H | -5.6862  | -5.7067 | -2.0782  |
| H | -4.3863  | -5.5128 | -3.2396  |
| C | -6.3086  | -4.8329 | -3.9524  |
| H | -5.8968  | -4.1567 | -4.7129  |
| H | -7.1948  | -4.3281 | -3.5462  |
| C | -6.7382  | -6.1439 | -4.6208  |
| H | -7.1512  | -6.8184 | -3.8595  |
| H | -5.8536  | -6.6511 | -5.0274  |
| C | -7.7697  | -5.9523 | -5.7385  |
| H | -7.3520  | -5.2884 | -6.5065  |
| H | -8.6473  | -5.4319 | -5.3334  |
| C | -8.2196  | -7.2631 | -6.3937  |
| H | -8.6381  | -7.9256 | -5.6249  |
| H | -7.3436  | -7.7855 | -6.7997  |
| C | -9.2533  | -7.0678 | -7.5087  |
| H | -8.8312  | -6.4142 | -8.2831  |
| H | -10.1235 | -6.5347 | -7.1040  |
| C | -9.7202  | -8.3781 | -8.1531  |
| H | -10.1425 | -9.0309 | -7.3781  |
| H | -8.8514  | -8.9124 | -8.5590  |
| C | -10.7561 | -8.1800 | -9.2653  |
| H | -10.3322 | -7.5330 | -10.0446 |

|   |          |          |          |
|---|----------|----------|----------|
| H | -11.6219 | -7.6392  | -8.8610  |
| C | -11.2344 | -9.4891  | -9.9036  |
| H | -11.6581 | -10.1355 | -9.1252  |
| H | -10.3705 | -10.0297 | -10.3094 |
| C | -12.2703 | -9.2792  | -11.0119 |
| H | -11.8632 | -8.6667  | -11.8227 |
| H | -12.5921 | -10.2306 | -11.4448 |
| H | -13.1608 | -8.7701  | -10.6296 |
| H | -1.4491  | -0.7731  | 0.8905   |

**TS17-1**

|   |          |         |         |
|---|----------|---------|---------|
| C | -4.0627  | -2.3098 | -0.1867 |
| H | -4.9704  | -1.7655 | 0.1020  |
| H | -3.5614  | -1.6892 | -0.9405 |
| C | -3.1518  | -2.4622 | 1.0366  |
| H | -3.6334  | -3.0821 | 1.7986  |
| H | -2.2392  | -3.0016 | 0.7490  |
| C | -2.7510  | -1.1369 | 1.6543  |
| H | -3.8021  | -0.5691 | 2.0213  |
| H | -2.3427  | -0.4086 | 0.9522  |
| C | -1.9384  | -1.2172 | 2.9064  |
| O | -1.3183  | -0.0423 | 3.1631  |
| O | -1.8572  | -2.1839 | 3.6285  |
| C | -0.5496  | 0.0116  | 4.3790  |
| H | -1.1893  | -0.1716 | 5.2435  |
| H | 0.2473   | -0.7331 | 4.3596  |
| H | -0.1345  | 1.0164  | 4.4155  |
| H | -4.7086  | -0.1231 | 2.2869  |
| C | -4.4543  | -3.6521 | -0.8143 |
| H | -3.5448  | -4.2032 | -1.0862 |
| H | -4.9672  | -4.2655 | -0.0627 |
| C | -5.3490  | -3.5119 | -2.0510 |
| H | -4.8294  | -2.9085 | -2.8067 |
| H | -6.2526  | -2.9495 | -1.7828 |
| C | -5.7554  | -4.8549 | -2.6683 |
| H | -6.2878  | -5.4513 | -1.9161 |
| H | -4.8519  | -5.4243 | -2.9221 |
| C | -6.6328  | -4.7170 | -3.9178 |
| H | -6.0941  | -4.1325 | -4.6749 |
| H | -7.5299  | -4.1357 | -3.6682 |
| C | -7.0551  | -6.0607 | -4.5228 |
| H | -7.6038  | -6.6394 | -3.7684 |
| H | -6.1585  | -6.6476 | -4.7611 |
| C | -7.9189  | -5.9248 | -5.7819 |
| H | -7.3651  | -5.3568 | -6.5407 |
| H | -8.8097  | -5.3279 | -5.5472 |
| C | -8.3550  | -7.2692 | -6.3755 |
| H | -8.9155  | -7.8329 | -5.6184 |
| H | -7.4647  | -7.8700 | -6.6023 |
| C | -9.2099  | -7.1358 | -7.6409 |
| H | -8.6462  | -6.5799 | -8.4013 |
| H | -10.0963 | -6.5282 | -7.4166 |
| C | -9.6556  | -8.4810 | -8.2256 |
| H | -10.2225 | -9.0346 | -7.4658 |

|   |          |          |          |
|---|----------|----------|----------|
| H | -8.7695  | -9.0905  | -8.4458  |
| C | -10.5063 | -8.3504  | -9.4939  |
| H | -9.9386  | -7.8010  | -10.2564 |
| H | -11.3911 | -7.7380  | -9.2759  |
| C | -10.9569 | -9.6958  | -10.0745 |
| H | -11.5254 | -10.2441 | -9.3134  |
| H | -10.0733 | -10.3080 | -10.2924 |
| C | -11.8055 | -9.5559  | -11.3417 |
| H | -11.2513 | -9.0435  | -12.1345 |
| H | -12.1113 | -10.5320 | -11.7287 |
| H | -12.7138 | -8.9765  | -11.1475 |

**CH<sub>3</sub>(CH<sub>2</sub>)<sub>12</sub>CHCH<sub>2</sub>COOCH<sub>3</sub>**

|   |          |         |         |
|---|----------|---------|---------|
| C | -4.2100  | -2.0730 | -0.2919 |
| H | -5.1013  | -1.4852 | -0.0198 |
| H | -3.7722  | -1.5271 | -1.1478 |
| C | -3.2450  | -2.0874 | 0.8445  |
| C | -2.8733  | -0.8258 | 1.5409  |
| H | -3.7509  | -0.3156 | 1.9649  |
| H | -2.4500  | -0.0839 | 0.8423  |
| C | -1.8597  | -1.0041 | 2.6541  |
| O | -1.6686  | 0.1611  | 3.3127  |
| O | -1.2805  | -2.0243 | 2.9329  |
| C | -0.7084  | 0.1308  | 4.3850  |
| H | -1.0144  | -0.5826 | 5.1515  |
| H | 0.2763   | -0.1493 | 4.0082  |
| H | -0.6911  | 1.1413  | 4.7875  |
| C | -4.6419  | -3.4682 | -0.7627 |
| H | -3.7481  | -4.0486 | -1.0224 |
| H | -5.1173  | -3.9962 | 0.0726  |
| C | -5.5960  | -3.4396 | -1.9610 |
| H | -6.4847  | -2.8485 | -1.7041 |
| H | -5.1130  | -2.9137 | -2.7951 |
| C | -6.0346  | -4.8318 | -2.4291 |
| H | -5.1455  | -5.4273 | -2.6735 |
| H | -6.5296  | -5.3530 | -1.5995 |
| C | -6.9726  | -4.8041 | -3.6412 |
| H | -6.4744  | -4.2857 | -4.4708 |
| H | -7.8600  | -4.2048 | -3.3991 |
| C | -7.4154  | -6.1951 | -4.1091 |
| H | -7.9232  | -6.7100 | -3.2832 |
| H | -6.5276  | -6.7976 | -4.3412 |
| C | -8.3396  | -6.1662 | -5.3317 |
| H | -7.8297  | -5.6525 | -6.1571 |
| H | -9.2266  | -5.5620 | -5.1010 |
| C | -8.7840  | -7.5563 | -5.8009 |
| H | -9.3003  | -8.0680 | -4.9782 |
| H | -7.8967  | -8.1626 | -6.0251 |
| C | -9.6987  | -7.5262 | -7.0306 |
| H | -9.1817  | -7.0140 | -7.8525 |
| H | -10.5862 | -6.9201 | -6.8069 |
| C | -10.1423 | -8.9158 | -7.5023 |
| H | -10.6632 | -9.4270 | -6.6821 |
| H | -9.2546  | -9.5230 | -7.7223 |
| C | -11.0513 | -8.8850 | -8.7360 |
| H | -10.5312 | -8.3729 | -9.5562 |

|   |          |          |          |
|---|----------|----------|----------|
| H | -11.9403 | -8.2793  | -8.5167  |
| C | -11.4936 | -10.2739 | -9.2110  |
| H | -12.0156 | -10.7853 | -8.3930  |
| H | -10.6056 | -10.8795 | -9.4294  |
| C | -12.3988 | -10.2322 | -10.4457 |
| H | -11.8918 | -9.7574  | -11.2919 |
| H | -12.6961 | -11.2371 | -10.7585 |
| H | -13.3123 | -9.6625  | -10.2474 |
| H | -2.7135  | -2.9943  | 1.1067   |

**TS17-2**

|   |          |         |         |
|---|----------|---------|---------|
| C | -4.2332  | -2.1467 | -0.2159 |
| H | -5.1134  | -1.5405 | 0.0350  |
| H | -3.7405  | -1.6241 | -1.0509 |
| C | -3.2845  | -2.1796 | 0.9635  |
| H | -3.9704  | -2.7158 | 1.9546  |
| H | -2.4634  | -2.8900 | 0.8599  |
| C | -2.8316  | -0.8357 | 1.4894  |
| H | -3.6694  | -0.2452 | 1.8714  |
| H | -2.3963  | -0.2382 | 0.6741  |
| C | -1.7653  | -0.9305 | 2.5623  |
| O | -1.7175  | 0.2021  | 3.2959  |
| O | -1.0264  | -1.8677 | 2.7382  |
| C | -0.7040  | 0.2503  | 4.3185  |
| H | -0.8517  | -0.5554 | 5.0386  |
| H | 0.2889   | 0.1582  | 3.8760  |
| H | -0.8218  | 1.2196  | 4.7977  |
| H | -4.5157  | -3.0375 | 2.6813  |
| C | -4.6817  | -3.5353 | -0.6875 |
| H | -3.7955  | -4.1357 | -0.9279 |
| H | -5.1854  | -4.0510 | 0.1386  |
| C | -5.6116  | -3.4915 | -1.9048 |
| H | -6.4955  | -2.8866 | -1.6645 |
| H | -5.1045  | -2.9737 | -2.7294 |
| C | -6.0627  | -4.8770 | -2.3809 |
| H | -5.1785  | -5.4850 | -2.6120 |
| H | -6.5780  | -5.3915 | -1.5596 |
| C | -6.9812  | -4.8349 | -3.6074 |
| H | -6.4643  | -4.3200 | -4.4278 |
| H | -7.8653  | -4.2263 | -3.3772 |
| C | -7.4322  | -6.2196 | -4.0860 |
| H | -7.9549  | -6.7325 | -3.2682 |
| H | -6.5478  | -6.8300 | -4.3101 |
| C | -8.3419  | -6.1769 | -5.3191 |
| H | -7.8187  | -5.6628 | -6.1359 |
| H | -9.2269  | -5.5672 | -5.0954 |
| C | -8.7913  | -7.5612 | -5.8007 |
| H | -9.3182  | -8.0743 | -4.9857 |
| H | -7.9060  | -8.1719 | -6.0206 |
| C | -9.6950  | -7.5179 | -7.0382 |
| H | -9.1682  | -7.0028 | -7.8520 |
| H | -10.5813 | -6.9088 | -6.8180 |
| C | -10.1414 | -8.9020 | -7.5230 |
| H | -10.6703 | -9.4167 | -6.7102 |

|   |          |          |          |
|---|----------|----------|----------|
| H | -9.2549  | -9.5116  | -7.7410  |
| C | -11.0416 | -8.8586  | -8.7628  |
| H | -10.5139 | -8.3423  | -9.5755  |
| H | -11.9299 | -8.2512  | -8.5451  |
| C | -11.4856 | -10.2422 | -9.2512  |
| H | -12.0144 | -10.7582 | -8.4404  |
| H | -10.5983 | -10.8491 | -9.4687  |
| C | -12.3830 | -10.1880 | -10.4911 |
| H | -11.8692 | -9.7086  | -11.3305 |
| H | -12.6816 | -11.1895 | -10.8134 |
| H | -13.2958 | -9.6168  | -10.2941 |



**CH<sub>3</sub>(CH<sub>2</sub>)<sub>11</sub>CH(CH<sub>2</sub>)<sub>2</sub>COOCH<sub>3</sub>**

|   |          |         |         |
|---|----------|---------|---------|
| C | -3.5666  | -2.6390 | -0.3885 |
| C | -2.9468  | -2.6008 | 0.9690  |
| H | -3.5923  | -3.1119 | 1.6943  |
| H | -2.0076  | -3.1792 | 0.9843  |
| C | -2.6559  | -1.1796 | 1.4550  |
| H | -3.5732  | -0.5811 | 1.4778  |
| H | -1.9822  | -0.6582 | 0.7667  |
| C | -2.0397  | -1.1250 | 2.8352  |
| O | -1.7582  | 0.1510  | 3.1852  |
| O | -1.8205  | -2.0699 | 3.5536  |
| C | -1.1759  | 0.3360  | 4.4886  |
| H | -1.8544  | -0.0215 | 5.2645  |
| H | -0.2302  | -0.2024 | 4.5648  |
| H | -1.0153  | 1.4076  | 4.5853  |
| C | -4.1320  | -3.8974 | -0.9574 |
| H | -4.6163  | -4.4775 | -0.1596 |
| H | -3.3143  | -4.5461 | -1.3228 |
| C | -5.1252  | -3.6713 | -2.1077 |
| H | -4.6365  | -3.0800 | -2.8924 |
| H | -5.9602  | -3.0619 | -1.7418 |
| C | -5.6674  | -4.9696 | -2.7147 |
| H | -4.8308  | -5.5698 | -3.0955 |
| H | -6.1368  | -5.5702 | -1.9248 |
| C | -6.6801  | -4.7386 | -3.8420 |
| H | -7.5161  | -4.1401 | -3.4576 |
| H | -6.2127  | -4.1344 | -4.6305 |
| C | -7.2267  | -6.0327 | -4.4555 |
| H | -7.6864  | -6.6409 | -3.6658 |
| H | -6.3925  | -6.6277 | -4.8495 |
| C | -8.2506  | -5.7961 | -5.5716 |
| H | -9.0841  | -5.2014 | -5.1757 |
| H | -7.7917  | -5.1862 | -6.3605 |
| C | -8.8006  | -7.0873 | -6.1880 |
| H | -9.2553  | -7.6996 | -5.3984 |
| H | -7.9685  | -7.6801 | -6.5896 |
| C | -9.8312  | -6.8469 | -7.2971 |
| H | -10.6621 | -6.2528 | -6.8948 |
| H | -9.3766  | -6.2351 | -8.0872 |
| C | -10.3852 | -8.1364 | -7.9135 |
| H | -9.5553  | -8.7293 | -8.3195 |
| H | -10.8371 | -8.7495 | -7.1229 |
| C | -11.4201 | -7.8942 | -9.0180 |
| H | -10.9687 | -7.2825 | -9.8102 |

|   |          |         |          |
|---|----------|---------|----------|
| H | -12.2496 | -7.3000 | -8.6127  |
| C | -11.9781 | -9.1824 | -9.6338  |
| H | -11.1501 | -9.7756 | -10.0410 |
| H | -12.4285 | -9.7940 | -8.8425  |
| C | -13.0128 | -8.9291 | -10.7341 |
| H | -12.5818 | -8.3495 | -11.5566 |
| H | -13.3910 | -9.8665 | -11.1517 |
| H | -13.8700 | -8.3676 | -10.3491 |
| H | -3.4043  | -1.7996 | -1.0612  |

**TS17-3**

|   |          |         |         |
|---|----------|---------|---------|
| C | -3.9676  | -2.3803 | -0.2316 |
| H | -5.0308  | -1.6971 | 0.1439  |
| H | -3.5444  | -1.7184 | -0.9938 |
| C | -3.1092  | -2.4915 | 1.0117  |
| H | -3.6573  | -3.0243 | 1.7956  |
| H | -2.2300  | -3.1125 | 0.7956  |
| C | -2.6486  | -1.1333 | 1.5425  |
| H | -3.5037  | -0.4964 | 1.7903  |
| H | -2.0835  | -0.5836 | 0.7812  |
| C | -1.7742  | -1.2353 | 2.7731  |
| O | -1.4363  | -0.0071 | 3.2256  |
| O | -1.4095  | -2.2580 | 3.3003  |
| C | -0.5992  | 0.0282  | 4.3964  |
| H | -1.0962  | -0.4599 | 5.2359  |
| H | 0.3504   | -0.4725 | 4.2026  |
| H | -0.4396  | 1.0834  | 4.6071  |
| H | -5.8209  | -1.2395 | 0.4682  |
| C | -4.5070  | -3.6755 | -0.8027 |
| H | -5.0722  | -4.2059 | -0.0256 |
| H | -3.6587  | -4.3313 | -1.0525 |
| C | -5.3867  | -3.4914 | -2.0449 |
| H | -4.8140  | -2.9633 | -2.8180 |
| H | -6.2324  | -2.8404 | -1.7928 |
| C | -5.9145  | -4.8111 | -2.6183 |
| H | -5.0670  | -5.4557 | -2.8858 |
| H | -6.4688  | -5.3476 | -1.8375 |
| C | -6.8191  | -4.6283 | -3.8420 |
| H | -7.6704  | -3.9918 | -3.5676 |
| H | -6.2710  | -4.0820 | -4.6205 |
| C | -7.3422  | -5.9468 | -4.4233 |
| H | -7.8615  | -6.5078 | -3.6354 |
| H | -6.4923  | -6.5706 | -4.7294 |
| C | -8.2891  | -5.7591 | -5.6140 |
| H | -9.1434  | -5.1456 | -5.2996 |
| H | -7.7776  | -5.1863 | -6.3984 |
| C | -8.8052  | -7.0759 | -6.2054 |
| H | -9.2871  | -7.6633 | -5.4130 |
| H | -7.9539  | -7.6760 | -6.5522 |
| C | -9.7939  | -6.8831 | -7.3609 |
| H | -10.6477 | -6.2904 | -7.0075 |
| H | -9.3180  | -6.2870 | -8.1504 |
| C | -10.3064 | -8.1976 | -7.9603 |
| H | -9.4554  | -8.7813 | -8.3349 |

|   |          |          |          |
|---|----------|----------|----------|
| H | -10.7630 | -8.8029  | -7.1663  |
| C | -11.3221 | -8.0014  | -9.0913  |
| H | -10.8692 | -7.3924  | -9.8848  |
| H | -12.1745 | -7.4213  | -8.7141  |
| C | -11.8348 | -9.3137  | -9.6954  |
| H | -10.9848 | -9.8896  | -10.0817 |
| H | -12.2800 | -9.9261  | -8.9016  |
| C | -12.8597 | -9.1055  | -10.8141 |
| H | -12.4332 | -8.5250  | -11.6384 |
| H | -13.2045 | -10.0591 | -11.2240 |
| H | -13.7382 | -8.5638  | -10.4495 |

**CH<sub>3</sub>(CH<sub>2</sub>)<sub>10</sub>CH(CH<sub>2</sub>)<sub>3</sub>COOCH<sub>3</sub>**

|   |          |         |         |
|---|----------|---------|---------|
| C | -4.3510  | -2.1991 | -0.0273 |
| H | -3.8472  | -1.7555 | -0.8996 |
| C | -3.3298  | -2.4519 | 1.0899  |
| H | -3.8349  | -2.8798 | 1.9610  |
| H | -2.6049  | -3.2025 | 0.7618  |
| C | -2.5938  | -1.1790 | 1.5062  |
| H | -3.2993  | -0.4076 | 1.8370  |
| H | -2.0543  | -0.7367 | 0.6616  |
| C | -1.6006  | -1.3901 | 2.6279  |
| O | -0.9182  | -0.2504 | 2.8862  |
| O | -1.4209  | -2.4180 | 3.2338  |
| C | 0.0507   | -0.3198 | 3.9483  |
| H | -0.4327  | -0.5817 | 4.8906  |
| H | 0.8154   | -1.0638 | 3.7204  |
| H | 0.4894   | 0.6740  | 4.0066  |
| C | -5.0974  | -3.4202 | -0.4514 |
| H | -5.0619  | -1.4207 | 0.3085  |
| C | -5.9643  | -3.4268 | -1.6659 |
| H | -6.8774  | -2.8305 | -1.4805 |
| H | -5.4526  | -2.9029 | -2.4869 |
| C | -6.3824  | -4.8287 | -2.1329 |
| H | -5.4822  | -5.4182 | -2.3438 |
| H | -6.8977  | -5.3410 | -1.3106 |
| C | -7.2863  | -4.8164 | -3.3701 |
| H | -8.1879  | -4.2282 | -3.1553 |
| H | -6.7720  | -4.2951 | -4.1881 |
| C | -7.6959  | -6.2156 | -3.8438 |
| H | -6.7935  | -6.8043 | -4.0533 |
| H | -8.2147  | -6.7362 | -3.0284 |
| C | -8.5918  | -6.2052 | -5.0878 |
| H | -9.4961  | -5.6194 | -4.8778 |
| H | -8.0735  | -5.6811 | -5.9013 |
| C | -8.9959  | -7.6043 | -5.5664 |
| H | -9.5158  | -8.1285 | -4.7539 |
| H | -8.0912  | -8.1902 | -5.7745 |
| C | -9.8883  | -7.5934 | -6.8128 |
| H | -10.7944 | -7.0101 | -6.6039 |
| H | -9.3692  | -7.0664 | -7.6239 |
| C | -10.2885 | -8.9923 | -7.2956 |
| H | -10.8082 | -9.5197 | -6.4851 |
| H | -9.3821  | -9.5756 | -7.5041 |
| C | -11.1793 | -8.9807 | -8.5428 |
| H | -12.0873 | -8.3998 | -8.3344 |

|   |          |          |          |
|---|----------|----------|----------|
| H | -10.6609 | -8.4514  | -9.3532  |
| C | -11.5771 | -10.3788 | -9.0297  |
| H | -12.0959 | -10.9081 | -8.2210  |
| H | -10.6700 | -10.9592 | -9.2387  |
| C | -12.4665 | -10.3561 | -10.2763 |
| H | -12.7313 | -11.3674 | -10.5978 |
| H | -13.3981 | -9.8132  | -10.0876 |
| H | -11.9616 | -9.8633  | -11.1134 |
| H | -5.1770  | -4.2484  | 0.2485   |

**TS17-4**

|   |          |         |         |
|---|----------|---------|---------|
| C | -4.1613  | -2.3479 | -0.1079 |
| H | -3.6680  | -1.8183 | -0.9378 |
| C | -3.1809  | -2.4763 | 1.0634  |
| H | -3.6552  | -3.0248 | 1.8832  |
| H | -2.3155  | -3.0730 | 0.7605  |
| C | -2.7013  | -1.1173 | 1.5734  |
| H | -3.5316  | -0.5145 | 1.9539  |
| H | -2.2602  | -0.5301 | 0.7581  |
| C | -1.6512  | -1.2149 | 2.6592  |
| O | -1.4577  | -0.0146 | 3.2520  |
| O | -1.0401  | -2.2091 | 2.9664  |
| C | -0.4513  | 0.0274  | 4.2807  |
| H | -0.7023  | -0.6610 | 5.0888  |
| H | 0.5241   | -0.2413 | 3.8723  |
| H | -0.4460  | 1.0542  | 4.6399  |
| C | -4.6788  | -3.6779 | -0.6171 |
| H | -5.3907  | -4.1691 | 0.3776  |
| H | -3.8945  | -4.4343 | -0.7172 |
| H | -5.0116  | -1.7167 | 0.1824  |
| H | -5.9551  | -4.4678 | 1.1041  |
| C | -5.6233  | -3.6377 | -1.8007 |
| H | -6.4779  | -2.9910 | -1.5626 |
| H | -5.1092  | -3.1519 | -2.6447 |
| C | -6.1284  | -5.0156 | -2.2459 |
| H | -5.2680  | -5.6579 | -2.4730 |
| H | -6.6545  | -5.4936 | -1.4110 |
| C | -7.0539  | -4.9586 | -3.4661 |
| H | -7.9104  | -4.3099 | -3.2411 |
| H | -6.5233  | -4.4816 | -4.3005 |
| C | -7.5657  | -6.3327 | -3.9128 |
| H | -6.7094  | -6.9849 | -4.1282 |
| H | -8.1050  | -6.8052 | -3.0818 |
| C | -8.4795  | -6.2767 | -5.1423 |
| H | -9.3343  | -5.6219 | -4.9284 |
| H | -7.9380  | -5.8060 | -5.9732 |
| C | -8.9950  | -7.6494 | -5.5893 |
| H | -9.5419  | -8.1178 | -4.7608 |
| H | -8.1403  | -8.3061 | -5.7976 |
| C | -9.9008  | -7.5927 | -6.8247 |
| H | -10.7549 | -6.9350 | -6.6171 |
| H | -9.3528  | -7.1248 | -7.6529 |
| C | -10.4176 | -8.9645 | -7.2730 |
| H | -10.9689 | -9.4312 | -6.4463 |

|   |          |          |          |
|---|----------|----------|----------|
| H | -9.5636  | -9.6232  | -7.4775  |
| C | -11.3186 | -8.9071  | -8.5116  |
| H | -12.1732 | -8.2485  | -8.3081  |
| H | -10.7676 | -8.4408  | -9.3389  |
| C | -11.8365 | -10.2779 | -8.9619  |
| H | -12.3889 | -10.7435 | -8.1365  |
| H | -10.9833 | -10.9365 | -9.1651  |
| C | -12.7342 | -10.2093 | -10.2009 |
| H | -13.0876 | -11.2016 | -10.4948 |
| H | -13.6141 | -9.5844  | -10.0175 |
| H | -12.1984 | -9.7815  | -11.0542 |



**CH<sub>3</sub>(CH<sub>2</sub>)<sub>9</sub>CH(CH<sub>2</sub>)<sub>4</sub>COOCH<sub>3</sub>**

|   |         |         |         |
|---|---------|---------|---------|
| C | -0.0427 | -0.1144 | -0.2008 |
| H | -0.0037 | -0.0350 | 0.8926  |
| H | 0.9989  | -0.1810 | -0.5400 |
| C | -0.7940 | -1.3888 | -0.5985 |
| H | -1.8321 | -1.3320 | -0.2562 |
| H | -0.8425 | -1.4664 | -1.6897 |
| C | -0.1450 | -2.6514 | -0.0322 |
| H | -0.0898 | -2.6084 | 1.0619  |
| H | 0.8916  | -2.7522 | -0.3718 |
| C | -0.8744 | -3.9263 | -0.3963 |
| O | -0.2043 | -5.0107 | 0.0579  |
| O | -1.9145 | -4.0007 | -1.0039 |
| C | -0.8061 | -6.2883 | -0.2202 |
| H | -1.7917 | -6.3558 | 0.2429  |
| H | -0.9061 | -6.4374 | -1.2962 |
| H | -0.1312 | -7.0265 | 0.2076  |
| C | -0.6732 | 1.1623  | -0.7730 |
| H | -0.7310 | 1.0658  | -1.8730 |
| H | -1.7221 | 1.2324  | -0.4474 |
| C | 0.0493  | 2.4171  | -0.4102 |
| C | -0.5086 | 3.7630  | -0.7337 |
| H | -0.4613 | 3.9352  | -1.8254 |
| H | -1.5825 | 3.7849  | -0.4961 |
| C | 0.1995  | 4.9262  | -0.0244 |
| H | 0.1137  | 4.7895  | 1.0603  |
| H | 1.2719  | 4.8846  | -0.2537 |
| C | -0.3471 | 6.3040  | -0.4124 |
| H | -0.2538 | 6.4368  | -1.4982 |
| H | -1.4222 | 6.3432  | -0.1936 |
| C | 0.3558  | 7.4648  | 0.3004  |
| H | 0.2483  | 7.3412  | 1.3858  |
| H | 1.4331  | 7.4150  | 0.0952  |
| C | -0.1710 | 8.8458  | -0.1061 |
| H | -1.2489 | 8.8964  | 0.0955  |
| H | -0.0596 | 8.9691  | -1.1912 |
| C | 0.5317  | 10.0059 | 0.6081  |
| H | 0.4107  | 9.8895  | 1.6930  |
| H | 1.6110  | 9.9475  | 0.4159  |
| C | 0.0193  | 11.3882 | 0.1880  |
| H | -1.0601 | 11.4480 | 0.3795  |
| H | 0.1413  | 11.5039 | -0.8969 |
| C | 0.7236  | 12.5478 | 0.9011  |
| H | 0.5971  | 12.4368 | 1.9861  |

|   |         |         |         |
|---|---------|---------|---------|
| H | 1.8038  | 12.4851 | 0.7145  |
| C | 0.2195  | 13.9313 | 0.4750  |
| H | -0.8594 | 13.9955 | 0.6624  |
| H | 0.3460  | 14.0427 | -0.6089 |
| C | 0.9308  | 15.0827 | 1.1918  |
| H | 0.7912  | 15.0206 | 2.2758  |
| H | 2.0078  | 15.0645 | 0.9968  |
| H | 0.5507  | 16.0544 | 0.8638  |
| H | 1.0908  | 2.3479  | -0.1050 |

**TS17-5**

|   |         |         |         |
|---|---------|---------|---------|
| C | -0.0662 | -0.1626 | -0.0258 |
| H | -0.1048 | -0.1938 | 1.0698  |
| H | 0.9976  | -0.1910 | -0.2952 |
| C | -0.7736 | -1.3945 | -0.5997 |
| H | -1.8344 | -1.3733 | -0.3311 |
| H | -0.7412 | -1.3672 | -1.6939 |
| C | -0.1563 | -2.7040 | -0.1094 |
| H | -0.1802 | -2.7648 | 0.9848  |
| H | 0.9030  | -2.7705 | -0.3812 |
| C | -0.8464 | -3.9394 | -0.6457 |
| O | -0.2200 | -5.0617 | -0.2233 |
| O | -1.8245 | -3.9559 | -1.3524 |
| C | -0.7918 | -6.3082 | -0.6606 |
| H | -1.8158 | -6.4073 | -0.2973 |
| H | -0.7919 | -6.3678 | -1.7499 |
| H | -0.1585 | -7.0834 | -0.2348 |
| C | -0.6717 | 1.1598  | -0.5118 |
| H | -0.6274 | 1.1951  | -1.6112 |
| H | -1.7387 | 1.1918  | -0.2570 |
| C | 0.0145  | 2.3904  | 0.0450  |
| H | -0.1836 | 2.3329  | 1.3476  |
| H | 1.1063  | 2.3351  | -0.0089 |
| C | -0.5334 | 3.7369  | -0.3812 |
| H | -0.4714 | 3.8117  | -1.4781 |
| H | -1.6033 | 3.7866  | -0.1409 |
| C | 0.1922  | 4.9331  | 0.2467  |
| H | 0.1196  | 4.8652  | 1.3388  |
| H | 1.2616  | 4.8717  | 0.0071  |
| C | -0.3526 | 6.2886  | -0.2165 |
| H | -0.2746 | 6.3563  | -1.3095 |
| H | -1.4240 | 6.3466  | 0.0154  |
| C | 0.3664  | 7.4851  | 0.4166  |
| H | 0.2803  | 7.4213  | 1.5091  |
| H | 1.4393  | 7.4218  | 0.1931  |
| C | -0.1672 | 8.8429  | -0.0539 |
| H | -1.2410 | 8.9057  | 0.1658  |
| H | -0.0771 | 8.9079  | -1.1461 |
| C | 0.5496  | 10.0383 | 0.5839  |
| H | 0.4550  | 9.9757  | 1.6759  |
| H | 1.6241  | 9.9722  | 0.3689  |
| C | 0.0230  | 11.3972 | 0.1087  |
| H | -1.0517 | 11.4637 | 0.3228  |
| H | 0.1188  | 11.4602 | -0.9832 |

|   |         |         |         |
|---|---------|---------|---------|
| C | 0.7399  | 12.5916 | 0.7477  |
| H | 0.6428  | 12.5307 | 1.8397  |
| H | 1.8152  | 12.5247 | 0.5355  |
| C | 0.2172  | 13.9517 | 0.2715  |
| H | -0.8566 | 14.0198 | 0.4847  |
| H | 0.3142  | 14.0131 | -0.8194 |
| C | 0.9411  | 15.1380 | 0.9151  |
| H | 0.8325  | 15.1239 | 2.0043  |
| H | 2.0123  | 15.1166 | 0.6905  |
| H | 0.5456  | 16.0918 | 0.5547  |
| H | -0.3949 | 2.2907  | 2.2908  |

**CH<sub>3</sub>(CH<sub>2</sub>)<sub>8</sub>CH(CH<sub>2</sub>)<sub>5</sub>COOCH<sub>3</sub>**

|   |         |         |         |
|---|---------|---------|---------|
| C | -0.1723 | -0.1645 | 0.4287  |
| H | -0.1018 | -0.1724 | 1.5244  |
| H | 0.8449  | -0.3470 | 0.0579  |
| C | -1.0937 | -1.2989 | -0.0325 |
| H | -2.1102 | -1.1252 | 0.3346  |
| H | -1.1658 | -1.2978 | -1.1247 |
| C | -0.6149 | -2.6721 | 0.4386  |
| H | -0.5567 | -2.7182 | 1.5319  |
| H | 0.4016  | -2.8782 | 0.0844  |
| C | -1.4952 | -3.8140 | -0.0208 |
| O | -1.0306 | -4.9970 | 0.4439  |
| O | -2.4817 | -3.7179 | -0.7093 |
| C | -1.7841 | -6.1641 | 0.0671  |
| H | -2.8086 | -6.0935 | 0.4353  |
| H | -1.8016 | -6.2739 | -1.0183 |
| H | -1.2688 | -7.0040 | 0.5281  |
| C | -0.6381 | 1.2187  | -0.0374 |
| H | -0.7155 | 1.2245  | -1.1317 |
| H | -1.6489 | 1.4105  | 0.3417  |
| C | 0.2895  | 2.3583  | 0.4048  |
| H | 0.3777  | 2.3572  | 1.5024  |
| H | 1.3130  | 2.1431  | 0.0453  |
| C | -0.1363 | 3.7107  | -0.0618 |
| C | 0.5670  | 4.9493  | 0.3839  |
| H | 0.7471  | 4.9025  | 1.4685  |
| H | 1.5777  | 4.9874  | -0.0642 |
| C | -0.1702 | 6.2514  | 0.0406  |
| H | -0.3589 | 6.2802  | -1.0401 |
| H | -1.1551 | 6.2429  | 0.5226  |
| C | 0.5921  | 7.5146  | 0.4545  |
| H | 0.7898  | 7.4820  | 1.5339  |
| H | 1.5753  | 7.5197  | -0.0338 |
| C | -0.1465 | 8.8144  | 0.1157  |
| H | -1.1245 | 8.8150  | 0.6141  |
| H | -0.3555 | 8.8405  | -0.9617 |
| C | 0.6230  | 10.0802 | 0.5104  |
| H | 0.8354  | 10.0539 | 1.5872  |
| H | 1.5994  | 10.0803 | 0.0088  |
| C | -0.1174 | 11.3796 | 0.1735  |
| H | -1.0906 | 11.3831 | 0.6812  |
| H | -0.3367 | 11.4017 | -0.9020 |
| C | 0.6566  | 12.6460 | 0.5562  |
| H | 0.8775  | 12.6251 | 1.6315  |

|   |         |         |         |
|---|---------|---------|---------|
| H | 1.6294  | 12.6436 | 0.0473  |
| C | -0.0834 | 13.9459 | 0.2200  |
| H | -1.0538 | 13.9508 | 0.7312  |
| H | -0.3062 | 13.9661 | -0.8538 |
| C | 0.7003  | 15.2053 | 0.6013  |
| H | 0.9068  | 15.2326 | 1.6759  |
| H | 1.6619  | 15.2454 | 0.0798  |
| H | 0.1469  | 16.1137 | 0.3468  |
| H | -0.8306 | 3.7791  | -0.8959 |

**TS17-6**

|   |         |         |         |
|---|---------|---------|---------|
| C | -0.2244 | -0.1571 | 0.4115  |
| H | -0.0960 | -0.1877 | 1.5015  |
| H | 0.7812  | -0.2647 | -0.0157 |
| C | -1.0965 | -1.3364 | -0.0326 |
| H | -2.1010 | -1.2361 | 0.3905  |
| H | -1.2260 | -1.3139 | -1.1193 |
| C | -0.5095 | -2.6868 | 0.3774  |
| H | -0.3753 | -2.7454 | 1.4638  |
| H | 0.4905  | -2.8302 | -0.0470 |
| C | -1.3569 | -3.8699 | -0.0378 |
| O | -0.7640 | -5.0337 | 0.3160  |
| O | -2.4206 | -3.8175 | -0.6053 |
| C | -1.4792 | -6.2363 | -0.0224 |
| H | -2.4537 | -6.2525 | 0.4677  |
| H | -1.6211 | -6.3058 | -1.1018 |
| H | -0.8575 | -7.0542 | 0.3352  |
| C | -0.8009 | 1.2044  | 0.0087  |
| H | -0.9256 | 1.2390  | -1.0799 |
| H | -1.8062 | 1.3120  | 0.4351  |
| C | 0.0645  | 2.3889  | 0.4554  |
| H | 0.1932  | 2.3510  | 1.5484  |
| H | 1.0735  | 2.2887  | 0.0345  |
| C | -0.5039 | 3.7420  | 0.0796  |
| H | -0.5145 | 3.7567  | -1.2376 |
| H | -1.5707 | 3.8364  | 0.3056  |
| C | 0.2987  | 4.9631  | 0.4802  |
| H | 0.4415  | 4.9504  | 1.5719  |
| H | 1.3058  | 4.8932  | 0.0488  |
| C | -0.3470 | 6.2930  | 0.0726  |
| H | -0.4982 | 6.3017  | -1.0135 |
| H | -1.3467 | 6.3584  | 0.5207  |
| C | 0.4721  | 7.5219  | 0.4822  |
| H | 0.6388  | 7.5019  | 1.5671  |
| H | 1.4665  | 7.4643  | 0.0211  |
| C | -0.1880 | 8.8510  | 0.0979  |
| H | -1.1802 | 8.9085  | 0.5639  |
| H | -0.3610 | 8.8685  | -0.9859 |
| C | 0.6297  | 10.0840 | 0.4988  |
| H | 0.8131  | 10.0604 | 1.5810  |
| H | 1.6175  | 10.0338 | 0.0228  |
| C | -0.0425 | 11.4116 | 0.1304  |
| H | -1.0284 | 11.4621 | 0.6106  |
| H | -0.2310 | 11.4335 | -0.9509 |

|   |         |         |         |
|---|---------|---------|---------|
| C | 0.7745  | 12.6468 | 0.5251  |
| H | 0.9689  | 12.6230 | 1.6055  |
| H | 1.7582  | 12.6014 | 0.0396  |
| C | 0.0966  | 13.9740 | 0.1656  |
| H | -0.8847 | 14.0207 | 0.6533  |
| H | -0.0995 | 13.9978 | -0.9133 |
| C | 0.9212  | 15.2026 | 0.5608  |
| H | 1.1035  | 15.2263 | 1.6400  |
| H | 1.8956  | 15.2019 | 0.0620  |
| H | 0.4109  | 16.1313 | 0.2903  |
| H | -0.4505 | 3.7611  | -2.2040 |



**CH<sub>3</sub>(CH<sub>2</sub>)<sub>7</sub>CH(CH<sub>2</sub>)<sub>6</sub>COOCH<sub>3</sub>**

|   |         |         |         |
|---|---------|---------|---------|
| C | -0.0411 | -0.1023 | -0.1577 |
| H | -0.0282 | -0.1960 | 0.9361  |
| H | 1.0093  | -0.0266 | -0.4678 |
| C | -0.6647 | -1.3613 | -0.7700 |
| H | -1.7130 | -1.4424 | -0.4651 |
| H | -0.6763 | -1.2779 | -1.8614 |
| C | 0.0762  | -2.6368 | -0.3694 |
| H | 0.0964  | -2.7574 | 0.7196  |
| H | 1.1276  | -2.5961 | -0.6766 |
| C | -0.5201 | -3.8975 | -0.9567 |
| O | 0.1626  | -4.9906 | -0.5434 |
| O | -1.4726 | -3.9558 | -1.6953 |
| C | -0.3124 | -6.2565 | -1.0368 |
| H | -1.3433 | -6.4266 | -0.7229 |
| H | -0.2615 | -6.2863 | -2.1262 |
| H | 0.3480  | -7.0040 | -0.6025 |
| C | -0.7750 | 1.1867  | -0.5438 |
| H | -0.7856 | 1.2824  | -1.6371 |
| H | -1.8257 | 1.1098  | -0.2360 |
| C | -0.1581 | 2.4477  | 0.0699  |
| H | -0.1509 | 2.3530  | 1.1632  |
| H | 0.8918  | 2.5285  | -0.2367 |
| C | -0.8922 | 3.7398  | -0.3149 |
| C | -0.3214 | 4.9740  | 0.3008  |
| C | -0.7321 | 6.3369  | -0.1482 |
| H | -0.7117 | 6.3852  | -1.2475 |
| H | -1.7907 | 6.5164  | 0.1175  |
| C | 0.1195  | 7.4744  | 0.4324  |
| H | 0.0874  | 7.4210  | 1.5279  |
| H | 1.1673  | 7.3172  | 0.1492  |
| C | -0.3283 | 8.8682  | -0.0199 |
| H | -1.3797 | 9.0187  | 0.2578  |
| H | -0.2936 | 8.9220  | -1.1159 |
| C | 0.5164  | 10.0040 | 0.5684  |
| H | 0.4807  | 9.9500  | 1.6643  |
| H | 1.5679  | 9.8535  | 0.2918  |
| C | 0.0706  | 11.3997 | 0.1176  |
| H | -0.9827 | 11.5478 | 0.3891  |
| H | 0.1119  | 11.4563 | -0.9780 |
| C | 0.9093  | 12.5356 | 0.7140  |
| H | 0.8677  | 12.4796 | 1.8097  |
| H | 1.9632  | 12.3888 | 0.4433  |
| C | 0.4646  | 13.9321 | 0.2647  |

|   |         |         |         |
|---|---------|---------|---------|
| H | -0.5888 | 14.0785 | 0.5331  |
| H | 0.5094  | 13.9900 | -0.8297 |
| C | 1.3058  | 15.0599 | 0.8696  |
| H | 1.2526  | 15.0502 | 1.9630  |
| H | 2.3596  | 14.9610 | 0.5902  |
| H | 0.9635  | 16.0414 | 0.5297  |
| H | -0.9040 | 3.8450  | -1.4100 |
| H | -1.9572 | 3.6377  | -0.0338 |
| H | 0.2362  | 4.8795  | 1.2297  |

**TS17-7**

|   |         |         |         |
|---|---------|---------|---------|
| C | 0.0298  | -0.1466 | -0.1999 |
| H | 0.1330  | -0.2185 | 0.8908  |
| H | 1.0514  | -0.1442 | -0.6014 |
| C | -0.7218 | -1.3755 | -0.7229 |
| H | -1.7389 | -1.3898 | -0.3184 |
| H | -0.8329 | -1.3089 | -1.8098 |
| C | -0.0196 | -2.6860 | -0.3676 |
| H | 0.0999  | -2.7896 | 0.7169  |
| H | 0.9971  | -2.7127 | -0.7758 |
| C | -0.7421 | -3.9187 | -0.8658 |
| O | -0.0757 | -5.0422 | -0.5125 |
| O | -1.7723 | -3.9333 | -1.4942 |
| C | -0.6657 | -6.2863 | -0.9320 |
| H | -1.6627 | -6.4002 | -0.5041 |
| H | -0.7371 | -6.3282 | -2.0199 |
| H | 0.0003  | -7.0629 | -0.5623 |
| C | -0.6528 | 1.1789  | -0.5558 |
| H | -0.7459 | 1.2549  | -1.6467 |
| H | -1.6777 | 1.1752  | -0.1631 |
| C | 0.0912  | 2.4084  | -0.0238 |
| H | 0.1692  | 2.3404  | 1.0688  |
| H | 1.1196  | 2.4047  | -0.4041 |
| C | -0.5770 | 3.7370  | -0.3990 |
| C | 0.1378  | 4.9585  | 0.1419  |
| H | 0.3895  | 4.8727  | 1.2036  |
| H | 1.3329  | 4.9296  | -0.4110 |
| C | -0.4317 | 6.3132  | -0.2270 |
| H | -0.4659 | 6.4065  | -1.3203 |
| H | -1.4794 | 6.3615  | 0.1083  |
| C | 0.3430  | 7.4956  | 0.3675  |
| H | 0.3471  | 7.4085  | 1.4616  |
| H | 1.3915  | 7.4332  | 0.0523  |
| C | -0.2253 | 8.8620  | -0.0306 |
| H | -1.2789 | 8.9206  | 0.2728  |
| H | -0.2192 | 8.9506  | -1.1247 |
| C | 0.5419  | 10.0423 | 0.5760  |
| H | 0.5235  | 9.9610  | 1.6706  |
| H | 1.5981  | 9.9738  | 0.2849  |
| C | -0.0072 | 11.4122 | 0.1618  |
| H | -1.0651 | 11.4802 | 0.4474  |
| H | 0.0172  | 11.4952 | -0.9326 |
| C | 0.7579  | 12.5906 | 0.7745  |
| H | 0.7278  | 12.5121 | 1.8692  |

|   |         |         |         |
|---|---------|---------|---------|
| H | 1.8173  | 12.5190 | 0.4951  |
| C | 0.2187  | 13.9623 | 0.3534  |
| H | -0.8399 | 14.0347 | 0.6316  |
| H | 0.2508  | 14.0419 | -0.7402 |
| C | 0.9894  | 15.1321 | 0.9722  |
| H | 0.9459  | 15.1003 | 2.0656  |
| H | 2.0451  | 15.1068 | 0.6837  |
| H | 0.5810  | 16.0947 | 0.6519  |
| H | -0.6544 | 3.8149  | -1.4911 |
| H | -1.6130 | 3.7393  | -0.0261 |
| H | 2.1809  | 4.9162  | -0.8800 |

**CH<sub>3</sub>(CH<sub>2</sub>)<sub>6</sub>CH(CH<sub>2</sub>)<sub>7</sub>COOCH<sub>3</sub>**

|   |         |         |         |
|---|---------|---------|---------|
| C | 0.5462  | -0.0752 | -1.0574 |
| H | 0.6194  | -0.2082 | 0.0300  |
| H | 1.5743  | -0.1302 | -1.4391 |
| C | -0.2816 | -1.2175 | -1.6564 |
| H | -1.3081 | -1.1705 | -1.2787 |
| H | -0.3561 | -1.0938 | -2.7414 |
| C | 0.3075  | -2.5929 | -1.3445 |
| H | 0.3819  | -2.7558 | -0.2634 |
| H | 1.3330  | -2.6783 | -1.7220 |
| C | -0.4860 | -3.7431 | -1.9252 |
| O | 0.0741  | -4.9294 | -1.5925 |
| O | -1.4840 | -3.6507 | -2.5973 |
| C | -0.5907 | -6.1049 | -2.0906 |
| H | -1.6122 | -6.1565 | -1.7112 |
| H | -0.6149 | -6.0977 | -3.1813 |
| H | -0.0046 | -6.9461 | -1.7267 |
| C | -0.0287 | 1.3136  | -1.3576 |
| H | -0.1017 | 1.4471  | -2.4445 |
| H | -1.0560 | 1.3695  | -0.9757 |
| C | 0.7963  | 2.4595  | -0.7613 |
| H | 0.8672  | 2.3259  | 0.3261  |
| H | 1.8246  | 2.4010  | -1.1416 |
| C | 0.2245  | 3.8484  | -1.0638 |
| H | 0.1577  | 3.9846  | -2.1505 |
| H | -0.8024 | 3.9123  | -0.6842 |
| C | 1.0518  | 4.9952  | -0.4661 |
| H | 1.1243  | 4.8679  | 0.6245  |
| H | 2.0937  | 4.9034  | -0.8265 |
| C | 0.5268  | 6.3573  | -0.7772 |
| C | 1.0466  | 7.5735  | -0.0855 |
| H | 1.0912  | 7.3905  | 0.9988  |
| H | 2.0980  | 7.7516  | -0.3797 |
| C | 0.2387  | 8.8497  | -0.3586 |
| H | -0.7992 | 8.6913  | -0.0416 |
| H | 0.2044  | 9.0261  | -1.4411 |
| C | 0.8028  | 10.0916 | 0.3395  |
| H | 0.8360  | 9.9146  | 1.4225  |
| H | 1.8439  | 10.2416 | 0.0250  |
| C | 0.0029  | 11.3693 | 0.0614  |
| H | -1.0379 | 11.2207 | 0.3771  |
| H | -0.0312 | 11.5454 | -1.0217 |
| C | 0.5691  | 12.6122 | 0.7570  |
| H | 0.6005  | 12.4385 | 1.8406  |

|   |         |         |         |
|---|---------|---------|---------|
| H | 1.6111  | 12.7593 | 0.4437  |
| C | -0.2259 | 13.8923 | 0.4756  |
| H | -1.2666 | 13.7471 | 0.7903  |
| H | -0.2581 | 14.0657 | -0.6071 |
| C | 0.3496  | 15.1286 | 1.1727  |
| H | 0.3613  | 15.0002 | 2.2598  |
| H | 1.3788  | 15.3197 | 0.8524  |
| H | -0.2384 | 16.0236 | 0.9508  |
| H | -0.0825 | 6.4871  | -1.6686 |

**TS17-8**

|   |         |         |         |
|---|---------|---------|---------|
| C | 0.5318  | -0.0757 | -1.0888 |
| H | 0.6705  | -0.2251 | -0.0099 |
| H | 1.5396  | -0.0550 | -1.5240 |
| C | -0.2508 | -1.2579 | -1.6707 |
| H | -1.2582 | -1.2827 | -1.2425 |
| H | -0.3868 | -1.1213 | -2.7480 |
| C | 0.4383  | -2.5983 | -1.4148 |
| H | 0.5763  | -2.7757 | -0.3426 |
| H | 1.4471  | -2.6098 | -1.8438 |
| C | -0.3064 | -3.7857 | -1.9852 |
| O | 0.3064  | -4.9444 | -1.6482 |
| O | -1.3089 | -3.7409 | -2.6554 |
| C | -0.3047 | -6.1503 | -2.1421 |
| H | -1.3239 | -6.2448 | -1.7646 |
| H | -0.3267 | -6.1494 | -3.2329 |
| H | 0.3168  | -6.9632 | -1.7728 |
| C | -0.1480 | 1.2775  | -1.3259 |
| H | -0.2831 | 1.4303  | -2.4042 |
| H | -1.1566 | 1.2553  | -0.8940 |
| C | 0.6269  | 2.4625  | -0.7387 |
| H | 0.7627  | 2.3065  | 0.3393  |
| H | 1.6355  | 2.4865  | -1.1716 |
| C | -0.0559 | 3.8151  | -0.9699 |
| H | -0.1860 | 3.9766  | -2.0476 |
| H | -1.0644 | 3.7913  | -0.5404 |
| C | 0.7171  | 4.9973  | -0.3727 |
| H | 0.8594  | 4.8377  | 0.7040  |
| H | 1.7292  | 5.0239  | -0.8056 |
| C | 0.0574  | 6.3430  | -0.5955 |
| H | -0.2697 | 6.4959  | -1.6287 |
| H | -1.0976 | 6.2664  | 0.0345  |
| C | 0.7493  | 7.5542  | -0.0041 |
| H | 0.8677  | 7.4109  | 1.0779  |
| H | 1.7714  | 7.6114  | -0.4096 |
| C | 0.0266  | 8.8800  | -0.2718 |
| H | -0.9968 | 8.8169  | 0.1170  |
| H | -0.0664 | 9.0267  | -1.3555 |
| C | 0.7308  | 10.0928 | 0.3462  |
| H | 0.8183  | 9.9451  | 1.4304  |
| H | 1.7584  | 10.1501 | -0.0361 |
| C | 0.0160  | 11.4214 | 0.0745  |
| H | -1.0142 | 11.3601 | 0.4483  |
| H | -0.0634 | 11.5743 | -1.0097 |

|   |         |         |         |
|---|---------|---------|---------|
| C | 0.7108  | 12.6329 | 0.7059  |
| H | 0.7880  | 12.4810 | 1.7905  |
| H | 1.7422  | 12.6941 | 0.3346  |
| C | -0.0015 | 13.9628 | 0.4338  |
| H | -1.0326 | 13.9012 | 0.8026  |
| H | -0.0756 | 14.1169 | -0.6497 |
| C | 0.6972  | 15.1664 | 1.0730  |
| H | 0.7534  | 15.0593 | 2.1610  |
| H | 1.7205  | 15.2744 | 0.6993  |
| H | 0.1659  | 16.0979 | 0.8587  |
| H | -1.9099 | 6.2025  | 0.5573  |



**CH<sub>3</sub>(CH<sub>2</sub>)<sub>5</sub>CH(CH<sub>2</sub>)<sub>8</sub>COOCH<sub>3</sub>**

|   |         |         |         |
|---|---------|---------|---------|
| C | 0.0354  | -0.1110 | -0.1875 |
| H | 0.0683  | -0.1015 | 0.9099  |
| H | 1.0792  | -0.1785 | -0.5213 |
| C | -0.7337 | -1.3480 | -0.6640 |
| H | -1.7748 | -1.2899 | -0.3308 |
| H | -0.7705 | -1.3638 | -1.7581 |
| C | -0.1159 | -2.6530 | -0.1623 |
| H | -0.0756 | -2.6750 | 0.9329  |
| H | 0.9238  | -2.7527 | -0.4932 |
| C | -0.8597 | -3.8914 | -0.6127 |
| O | -0.2382 | -5.0116 | -0.1760 |
| O | -1.8715 | -3.9129 | -1.2702 |
| C | -0.8556 | -6.2599 | -0.5395 |
| H | -1.8659 | -6.3201 | -0.1322 |
| H | -0.9016 | -6.3619 | -1.6247 |
| H | -0.2230 | -7.0331 | -0.1090 |
| C | -0.5691 | 1.2065  | -0.6853 |
| H | -0.5994 | 1.1978  | -1.7823 |
| H | -1.6134 | 1.2722  | -0.3541 |
| C | 0.1909  | 2.4497  | -0.2094 |
| H | 0.2201  | 2.4577  | 0.8879  |
| H | 1.2357  | 2.3843  | -0.5400 |
| C | -0.4155 | 3.7663  | -0.7074 |
| H | -0.4378 | 3.7621  | -1.8049 |
| H | -1.4627 | 3.8262  | -0.3834 |
| C | 0.3345  | 5.0106  | -0.2206 |
| H | 0.3579  | 5.0176  | 0.8758  |
| H | 1.3805  | 4.9571  | -0.5484 |
| C | -0.2794 | 6.3280  | -0.7156 |
| H | -0.3205 | 6.3041  | -1.8208 |
| H | -1.3319 | 6.3846  | -0.4005 |
| C | 0.4437  | 7.5517  | -0.2600 |
| C | -0.1545 | 8.9124  | -0.3957 |
| H | -1.2081 | 8.8839  | -0.0806 |
| H | -0.1907 | 9.2029  | -1.4626 |
| C | 0.5852  | 10.0086 | 0.3844  |
| H | 0.6050  | 9.7395  | 1.4474  |
| H | 1.6321  | 10.0375 | 0.0567  |
| C | -0.0369 | 11.3995 | 0.2209  |
| H | -1.0849 | 11.3670 | 0.5461  |
| H | -0.0582 | 11.6636 | -0.8445 |
| C | 0.6979  | 12.4970 | 0.9983  |
| H | 0.7221  | 12.2326 | 2.0636  |

|   |         |         |         |
|---|---------|---------|---------|
| H | 1.7454  | 12.5337 | 0.6716  |
| C | 0.0722  | 13.8876 | 0.8394  |
| H | -0.9740 | 13.8512 | 1.1672  |
| H | 0.0475  | 14.1521 | -0.2248 |
| C | 0.8128  | 14.9782 | 1.6187  |
| H | 0.8226  | 14.7605 | 2.6915  |
| H | 1.8537  | 15.0616 | 1.2899  |
| H | 0.3429  | 15.9564 | 1.4832  |
| H | 1.5044  | 7.4722  | -0.0328 |

**TS17-9**

|   |         |         |         |
|---|---------|---------|---------|
| C | 0.0157  | -0.1538 | -0.1711 |
| H | 0.0184  | -0.2206 | 0.9248  |
| H | 1.0695  | -0.1780 | -0.4786 |
| C | -0.7143 | -1.3689 | -0.7536 |
| H | -1.7644 | -1.3553 | -0.4450 |
| H | -0.7230 | -1.3086 | -1.8467 |
| C | -0.0807 | -2.6928 | -0.3265 |
| H | -0.0618 | -2.7867 | 0.7655  |
| H | 0.9673  | -2.7507 | -0.6410 |
| C | -0.7901 | -3.9126 | -0.8730 |
| O | -0.1608 | -5.0473 | -0.4884 |
| O | -1.7836 | -3.9096 | -1.5582 |
| C | -0.7475 | -6.2809 | -0.9420 |
| H | -1.7651 | -6.3829 | -0.5621 |
| H | -0.7681 | -6.3168 | -2.0322 |
| H | -0.1106 | -7.0686 | -0.5452 |
| C | -0.6014 | 1.1844  | -0.5928 |
| H | -0.5987 | 1.2541  | -1.6882 |
| H | -1.6561 | 1.2070  | -0.2903 |
| C | 0.1199  | 2.4026  | -0.0055 |
| H | 0.1129  | 2.3337  | 1.0900  |
| H | 1.1760  | 2.3767  | -0.3041 |
| C | -0.4916 | 3.7425  | -0.4301 |
| H | -0.4797 | 3.8150  | -1.5254 |
| H | -1.5488 | 3.7669  | -0.1358 |
| C | 0.2267  | 4.9577  | 0.1666  |
| H | 0.2090  | 4.8894  | 1.2610  |
| H | 1.2848  | 4.9325  | -0.1240 |
| C | -0.3803 | 6.2987  | -0.2634 |
| H | -0.3570 | 6.3706  | -1.3620 |
| H | -1.4423 | 6.3288  | 0.0129  |
| C | 0.3234  | 7.5073  | 0.3191  |
| H | 0.1474  | 7.4111  | 1.6221  |
| H | 1.4137  | 7.4465  | 0.2444  |
| C | -0.2217 | 8.8705  | -0.0547 |
| H | -1.2856 | 8.9221  | 0.2111  |
| H | -0.1836 | 8.9778  | -1.1500 |
| C | 0.5287  | 10.0411 | 0.5921  |
| H | 0.4827  | 9.9390  | 1.6830  |
| H | 1.5912  | 9.9793  | 0.3240  |
| C | -0.0163 | 11.4147 | 0.1860  |
| H | -1.0798 | 11.4752 | 0.4511  |
| H | 0.0302  | 11.5147 | -0.9064 |

|   |         |         |         |
|---|---------|---------|---------|
| C | 0.7323  | 12.5855 | 0.8324  |
| H | 0.6815  | 12.4888 | 1.9248  |
| H | 1.7972  | 12.5225 | 0.5723  |
| C | 0.1954  | 13.9616 | 0.4232  |
| H | -0.8682 | 14.0257 | 0.6837  |
| H | 0.2466  | 14.0587 | -0.6683 |
| C | 0.9506  | 15.1242 | 1.0739  |
| H | 0.8876  | 15.0751 | 2.1657  |
| H | 2.0113  | 15.1072 | 0.8039  |
| H | 0.5442  | 16.0902 | 0.7615  |
| H | -0.0492 | 7.3442  | 2.5673  |

**CH<sub>3</sub>(CH<sub>2</sub>)<sub>4</sub>CH(CH<sub>2</sub>)<sub>9</sub>COOCH<sub>3</sub>**

|   |         |         |         |
|---|---------|---------|---------|
| C | 0.0027  | -0.1609 | -0.1363 |
| H | -0.0275 | -0.2206 | 0.9596  |
| H | 1.0605  | -0.2535 | -0.4156 |
| C | -0.7865 | -1.3316 | -0.7325 |
| H | -1.8421 | -1.2488 | -0.4547 |
| H | -0.7599 | -1.2792 | -1.8258 |
| C | -0.2510 | -2.6896 | -0.2794 |
| H | -0.2756 | -2.7790 | 0.8127  |
| H | 0.8019  | -2.8129 | -0.5570 |
| C | -1.0133 | -3.8669 | -0.8475 |
| O | -0.4733 | -5.0356 | -0.4302 |
| O | -1.9750 | -3.8074 | -1.5741 |
| C | -1.1156 | -6.2339 | -0.9028 |
| H | -2.1546 | -6.2673 | -0.5715 |
| H | -1.0867 | -6.2792 | -1.9924 |
| H | -0.5498 | -7.0564 | -0.4706 |
| C | -0.5177 | 1.2106  | -0.5807 |
| H | -0.4887 | 1.2700  | -1.6763 |
| H | -1.5746 | 1.3041  | -0.3002 |
| C | 0.2691  | 2.3855  | 0.0108  |
| H | 0.2417  | 2.3244  | 1.1066  |
| H | 1.3258  | 2.2919  | -0.2717 |
| C | -0.2518 | 3.7578  | -0.4310 |
| H | -0.2281 | 3.8179  | -1.5268 |
| H | -1.3074 | 3.8528  | -0.1452 |
| C | 0.5380  | 4.9329  | 0.1562  |
| H | 0.5191  | 4.8693  | 1.2521  |
| H | 1.5927  | 4.8408  | -0.1346 |
| C | 0.0107  | 6.3040  | -0.2791 |
| H | 0.0273  | 6.3687  | -1.3744 |
| H | -1.0408 | 6.4017  | 0.0168  |
| C | 0.8057  | 7.4808  | 0.3033  |
| H | 0.8058  | 7.4176  | 1.4021  |
| H | 1.8683  | 7.3650  | 0.0188  |
| C | 0.3107  | 8.8239  | -0.1200 |
| C | 0.8197  | 10.0803 | 0.5046  |
| H | 0.8694  | 9.9559  | 1.5966  |
| H | 1.8678  | 10.2548 | 0.1965  |
| C | -0.0038 | 11.3311 | 0.1663  |
| H | -1.0369 | 11.1808 | 0.5022  |
| H | -0.0503 | 11.4440 | -0.9243 |
| C | 0.5531  | 12.6172 | 0.7851  |
| H | 0.6045  | 12.5028 | 1.8760  |

|   |         |         |         |
|---|---------|---------|---------|
| H | 1.5874  | 12.7643 | 0.4471  |
| C | -0.2685 | 13.8669 | 0.4491  |
| H | -1.3007 | 13.7225 | 0.7907  |
| H | -0.3227 | 13.9800 | -0.6406 |
| C | 0.2984  | 15.1486 | 1.0667  |
| H | 0.3319  | 15.0803 | 2.1588  |
| H | 1.3182  | 15.3384 | 0.7169  |
| H | -0.3089 | 16.0204 | 0.8077  |
| H | -0.2655 | 8.8988  | -1.0393 |

**TS17-10**

|   |         |         |         |
|---|---------|---------|---------|
| C | 0.0181  | -0.1700 | -0.1476 |
| H | -0.0212 | -0.2425 | 0.9473  |
| H | 1.0810  | -0.2272 | -0.4171 |
| C | -0.7295 | -1.3573 | -0.7641 |
| H | -1.7903 | -1.3072 | -0.4985 |
| H | -0.6914 | -1.2940 | -1.8564 |
| C | -0.1610 | -2.7037 | -0.3165 |
| H | -0.1938 | -2.8026 | 0.7747  |
| H | 0.8975  | -2.7960 | -0.5847 |
| C | -0.8857 | -3.8966 | -0.9011 |
| O | -0.3192 | -5.0536 | -0.4865 |
| O | -1.8412 | -3.8571 | -1.6371 |
| C | -0.9253 | -6.2649 | -0.9735 |
| H | -1.9651 | -6.3294 | -0.6494 |
| H | -0.8881 | -6.3003 | -2.0632 |
| H | -0.3402 | -7.0754 | -0.5442 |
| C | -0.5404 | 1.1895  | -0.5825 |
| H | -0.5019 | 1.2626  | -1.6769 |
| H | -1.6026 | 1.2460  | -0.3124 |
| C | 0.2015  | 2.3823  | 0.0309  |
| H | 0.1711  | 2.3031  | 1.1255  |
| H | 1.2622  | 2.3312  | -0.2474 |
| C | -0.3682 | 3.7410  | -0.3920 |
| H | -0.3437 | 3.8190  | -1.4867 |
| H | -1.4273 | 3.7921  | -0.1084 |
| C | 0.3746  | 4.9360  | 0.2162  |
| H | 0.3638  | 4.8495  | 1.3104  |
| H | 1.4306  | 4.8957  | -0.0813 |
| C | -0.2161 | 6.2912  | -0.1878 |
| H | -0.2148 | 6.3767  | -1.2820 |
| H | -1.2675 | 6.3348  | 0.1206  |
| C | 0.5330  | 7.4883  | 0.4102  |
| H | 0.5603  | 7.3976  | 1.5039  |
| H | 1.5839  | 7.4579  | 0.0831  |
| C | -0.0574 | 8.8321  | 0.0344  |
| H | -1.2583 | 8.8390  | 0.5746  |
| H | -0.2992 | 8.9126  | -1.0301 |
| C | 0.6288  | 10.0667 | 0.5823  |
| H | 0.6890  | 9.9936  | 1.6760  |
| H | 1.6710  | 10.0794 | 0.2271  |
| C | -0.0532 | 11.3836 | 0.1911  |
| H | -1.0903 | 11.3697 | 0.5468  |
| H | -0.1064 | 11.4503 | -0.9031 |

|   |         |         |         |
|---|---------|---------|---------|
| C | 0.6558  | 12.6262 | 0.7401  |
| H | 0.7176  | 12.5548 | 1.8339  |
| H | 1.6924  | 12.6437 | 0.3783  |
| C | -0.0328 | 13.9421 | 0.3604  |
| H | -1.0671 | 13.9246 | 0.7246  |
| H | -0.0971 | 14.0134 | -0.7323 |
| C | 0.6807  | 15.1803 | 0.9110  |
| H | 0.7316  | 15.1541 | 2.0041  |
| H | 1.7066  | 15.2464 | 0.5347  |
| H | 0.1631  | 16.1002 | 0.6252  |
| H | -2.1108 | 8.8362  | 1.0360  |



**CH<sub>3</sub>(CH<sub>2</sub>)<sub>3</sub>CH(CH<sub>2</sub>)<sub>10</sub>COOCH<sub>3</sub>**

|   |         |         |         |
|---|---------|---------|---------|
| C | 0.0127  | -0.1477 | -0.1307 |
| H | -0.0209 | -0.2083 | 0.9651  |
| H | 1.0762  | -0.1679 | -0.4026 |
| C | -0.6912 | -1.3700 | -0.7301 |
| H | -1.7508 | -1.3612 | -0.4557 |
| H | -0.6650 | -1.3147 | -1.8233 |
| C | -0.0642 | -2.6883 | -0.2769 |
| H | -0.0780 | -2.7756 | 0.8159  |
| H | 0.9930  | -2.7430 | -0.5591 |
| C | -0.7524 | -3.9146 | -0.8355 |
| O | -0.1156 | -5.0433 | -0.4453 |
| O | -1.7373 | -3.9212 | -1.5328 |
| C | -0.6845 | -6.2822 | -0.9068 |
| H | -1.7048 | -6.3956 | -0.5373 |
| H | -0.6938 | -6.3165 | -1.9971 |
| H | -0.0434 | -7.0638 | -0.5049 |
| C | -0.5970 | 1.1846  | -0.5809 |
| H | -0.5594 | 1.2469  | -1.6760 |
| H | -1.6611 | 1.2039  | -0.3128 |
| C | 0.0990  | 2.4109  | 0.0201  |
| H | 0.0583  | 2.3493  | 1.1155  |
| H | 1.1640  | 2.3887  | -0.2452 |
| C | -0.5059 | 3.7445  | -0.4331 |
| H | -0.4651 | 3.8062  | -1.5283 |
| H | -1.5708 | 3.7674  | -0.1678 |
| C | 0.1913  | 4.9701  | 0.1682  |
| H | 0.1505  | 4.9082  | 1.2635  |
| H | 1.2563  | 4.9462  | -0.0969 |
| C | -0.4112 | 6.3050  | -0.2844 |
| H | -0.3741 | 6.3654  | -1.3799 |
| H | -1.4752 | 6.3311  | -0.0153 |
| C | 0.2924  | 7.5276  | 0.3135  |
| H | 0.2580  | 7.4686  | 1.4083  |
| H | 1.3546  | 7.5052  | 0.0393  |
| C | -0.3109 | 8.8651  | -0.1346 |
| H | -1.3801 | 8.8911  | 0.1345  |
| H | -0.3061 | 8.9107  | -1.2381 |
| C | 0.3778  | 10.0663 | 0.4223  |
| C | -0.1392 | 11.4455 | 0.1809  |
| H | -1.1567 | 11.5404 | 0.5986  |
| H | -0.2731 | 11.6089 | -0.9021 |
| C | 0.7451  | 12.5604 | 0.7537  |
| H | 0.8673  | 12.4020 | 1.8326  |

|   |         |         |         |
|---|---------|---------|---------|
| H | 1.7488  | 12.4811 | 0.3175  |
| C | 0.1958  | 13.9693 | 0.5079  |
| H | -0.8059 | 14.0483 | 0.9480  |
| H | 0.0663  | 14.1234 | -0.5704 |
| C | 1.0905  | 15.0747 | 1.0762  |
| H | 1.2132  | 14.9671 | 2.1586  |
| H | 2.0882  | 15.0460 | 0.6268  |
| H | 0.6701  | 16.0664 | 0.8870  |
| H | 1.2902  | 9.9353  | 0.9970  |

**TS17-11**

|   |         |         |         |
|---|---------|---------|---------|
| C | 0.0355  | -0.1566 | -0.1707 |
| H | 0.0615  | -0.2170 | 0.9252  |
| H | 1.0821  | -0.1914 | -0.5008 |
| C | -0.7166 | -1.3691 | -0.7301 |
| H | -1.7609 | -1.3424 | -0.4027 |
| H | -0.7447 | -1.3175 | -1.8233 |
| C | -0.0886 | -2.6958 | -0.3037 |
| H | -0.0543 | -2.7835 | 0.7883  |
| H | 0.9543  | -2.7645 | -0.6333 |
| C | -0.8151 | -3.9127 | -0.8338 |
| O | -0.2013 | -5.0509 | -0.4344 |
| O | -1.8079 | -3.9051 | -1.5198 |
| C | -0.8028 | -6.2821 | -0.8749 |
| H | -1.8235 | -6.3653 | -0.4986 |
| H | -0.8189 | -6.3317 | -1.9646 |
| H | -0.1786 | -7.0732 | -0.4651 |
| C | -0.5800 | 1.1841  | -0.5867 |
| H | -0.6027 | 1.2471  | -1.6822 |
| H | -1.6271 | 1.2173  | -0.2596 |
| C | 0.1644  | 2.4003  | -0.0243 |
| H | 0.1891  | 2.3338  | 1.0712  |
| H | 1.2112  | 2.3682  | -0.3535 |
| C | -0.4530 | 3.7423  | -0.4336 |
| H | -0.4740 | 3.8123  | -1.5290 |
| H | -1.5008 | 3.7721  | -0.1079 |
| C | 0.2874  | 4.9571  | 0.1372  |
| H | 0.3120  | 4.8832  | 1.2321  |
| H | 1.3344  | 4.9303  | -0.1918 |
| C | -0.3337 | 6.3002  | -0.2627 |
| H | -0.3544 | 6.3786  | -1.3575 |
| H | -1.3817 | 6.3244  | 0.0630  |
| C | 0.4032  | 7.5114  | 0.3193  |
| H | 0.4257  | 7.4319  | 1.4128  |
| H | 1.4500  | 7.4923  | -0.0100 |
| C | -0.2232 | 8.8549  | -0.0739 |
| H | -1.2744 | 8.8780  | 0.2416  |
| H | -0.2405 | 8.9389  | -1.1717 |
| C | 0.4970  | 10.0599 | 0.4958  |
| H | 0.3772  | 9.9437  | 1.8033  |
| H | 1.5835  | 10.0080 | 0.3739  |
| C | -0.0735 | 11.4243 | 0.1673  |
| H | -1.1236 | 11.4645 | 0.4848  |
| H | -0.0889 | 11.5476 | -0.9268 |

|   |         |         |         |
|---|---------|---------|---------|
| C | 0.6991  | 12.5911 | 0.7944  |
| H | 0.7169  | 12.4673 | 1.8840  |
| H | 1.7455  | 12.5491 | 0.4651  |
| C | 0.1161  | 13.9659 | 0.4499  |
| H | -0.9289 | 14.0071 | 0.7805  |
| H | 0.0949  | 14.0873 | -0.6401 |
| C | 0.8947  | 15.1260 | 1.0769  |
| H | 0.9058  | 15.0504 | 2.1688  |
| H | 1.9351  | 15.1342 | 0.7363  |
| H | 0.4527  | 16.0914 | 0.8155  |
| H | 0.2203  | 9.8632  | 2.7551  |

**CH<sub>3</sub>(CH<sub>2</sub>)<sub>2</sub>CH(CH<sub>2</sub>)<sub>11</sub>COOCH<sub>3</sub>**

|   |         |         |         |
|---|---------|---------|---------|
| C | 0.0074  | -0.1623 | -0.1542 |
| H | 0.0266  | -0.2314 | 0.9414  |
| H | 1.0544  | -0.2211 | -0.4797 |
| C | -0.7720 | -1.3513 | -0.7263 |
| H | -1.8165 | -1.3023 | -0.4023 |
| H | -0.7946 | -1.2899 | -1.8191 |
| C | -0.1773 | -2.6962 | -0.3090 |
| H | -0.1506 | -2.7941 | 0.7824  |
| H | 0.8654  | -2.7863 | -0.6339 |
| C | -0.9292 | -3.8914 | -0.8527 |
| O | -0.3371 | -5.0465 | -0.4695 |
| O | -1.9236 | -3.8555 | -1.5354 |
| C | -0.9642 | -6.2600 | -0.9233 |
| H | -1.9853 | -6.3276 | -0.5449 |
| H | -0.9845 | -6.2957 | -2.0135 |
| H | -0.3546 | -7.0683 | -0.5253 |
| C | -0.5717 | 1.1967  | -0.5633 |
| H | -0.5900 | 1.2665  | -1.6585 |
| H | -1.6184 | 1.2557  | -0.2385 |
| C | 0.2035  | 2.3895  | 0.0072  |
| H | 0.2221  | 2.3183  | 1.1026  |
| H | 1.2503  | 2.3295  | -0.3181 |
| C | -0.3744 | 3.7496  | -0.4001 |
| H | -0.3938 | 3.8209  | -1.4954 |
| H | -1.4208 | 3.8101  | -0.0741 |
| C | 0.4019  | 4.9422  | 0.1699  |
| H | 0.4229  | 4.8697  | 1.2651  |
| H | 1.4480  | 4.8824  | -0.1577 |
| C | -0.1769 | 6.3028  | -0.2346 |
| H | -0.1998 | 6.3751  | -1.3298 |
| H | -1.2223 | 6.3633  | 0.0948  |
| C | 0.6011  | 7.4950  | 0.3338  |
| H | 0.6273  | 7.4201  | 1.4287  |
| H | 1.6457  | 7.4368  | 0.0010  |
| C | 0.0177  | 8.8543  | -0.0656 |
| H | -1.0246 | 8.9174  | 0.2694  |
| H | -0.0077 | 8.9316  | -1.1600 |
| C | 0.7985  | 10.0479 | 0.5019  |
| H | 0.8367  | 9.9754  | 1.5992  |
| H | 1.8539  | 9.9639  | 0.1810  |
| C | 0.2530  | 11.3803 | 0.1079  |
| C | 0.7279  | 12.6432 | 0.7457  |
| H | 0.7941  | 12.5052 | 1.8353  |

|   |         |         |         |
|---|---------|---------|---------|
| H | 1.7661  | 12.8578 | 0.4291  |
| C | -0.1391 | 13.8721 | 0.4364  |
| H | -1.1628 | 13.6812 | 0.7775  |
| H | -0.1981 | 14.0019 | -0.6508 |
| C | 0.3870  | 15.1587 | 1.0777  |
| H | 0.4265  | 15.0704 | 2.1682  |
| H | 1.3984  | 15.3907 | 0.7287  |
| H | -0.2510 | 16.0138 | 0.8379  |
| H | -0.3356 | 11.4506 | -0.8040 |

**TS17-12**

|   |         |         |         |
|---|---------|---------|---------|
| C | 0.0291  | -0.1662 | -0.1682 |
| H | 0.0366  | -0.2372 | 0.9275  |
| H | 1.0803  | -0.2131 | -0.4819 |
| C | -0.7314 | -1.3623 | -0.7509 |
| H | -1.7803 | -1.3234 | -0.4400 |
| H | -0.7410 | -1.3002 | -1.8439 |
| C | -0.1297 | -2.7019 | -0.3269 |
| H | -0.1136 | -2.7994 | 0.7648  |
| H | 0.9170  | -2.7834 | -0.6409 |
| C | -0.8660 | -3.9034 | -0.8781 |
| O | -0.2717 | -5.0538 | -0.4840 |
| O | -1.8510 | -3.8756 | -1.5747 |
| C | -0.8849 | -6.2723 | -0.9434 |
| H | -1.9101 | -6.3461 | -0.5775 |
| H | -0.8913 | -6.3101 | -2.0336 |
| H | -0.2749 | -7.0758 | -0.5362 |
| C | -0.5606 | 1.1869  | -0.5812 |
| H | -0.5655 | 1.2600  | -1.6762 |
| H | -1.6121 | 1.2322  | -0.2700 |
| C | 0.1917  | 2.3877  | 0.0033  |
| H | 0.2002  | 2.3107  | 1.0984  |
| H | 1.2426  | 2.3450  | -0.3116 |
| C | -0.4031 | 3.7410  | -0.4022 |
| H | -0.4107 | 3.8197  | -1.4971 |
| H | -1.4543 | 3.7817  | -0.0885 |
| C | 0.3453  | 4.9426  | 0.1857  |
| H | 0.3594  | 4.8591  | 1.2803  |
| H | 1.3949  | 4.9075  | -0.1344 |
| C | -0.2593 | 6.2949  | -0.2088 |
| H | -0.2742 | 6.3794  | -1.3032 |
| H | -1.3085 | 6.3284  | 0.1119  |
| C | 0.4862  | 7.4976  | 0.3806  |
| H | 0.5088  | 7.4078  | 1.4744  |
| H | 1.5335  | 7.4712  | 0.0522  |
| C | -0.1319 | 8.8469  | -0.0017 |
| H | -1.1763 | 8.8751  | 0.3311  |
| H | -0.1569 | 8.9382  | -1.0952 |
| C | 0.6155  | 10.0501 | 0.5859  |
| H | 0.6595  | 9.9590  | 1.6790  |
| H | 1.6619  | 10.0285 | 0.2435  |
| C | 0.0102  | 11.3898 | 0.2192  |
| H | -1.1875 | 11.3856 | 0.7673  |
| H | -0.2391 | 11.4720 | -0.8434 |

|   |         |         |         |
|---|---------|---------|---------|
| C | 0.6900  | 12.6278 | 0.7672  |
| H | 0.7489  | 12.5563 | 1.8612  |
| H | 1.7329  | 12.6455 | 0.4141  |
| C | 0.0049  | 13.9427 | 0.3748  |
| H | -1.0331 | 13.9240 | 0.7251  |
| H | -0.0423 | 14.0102 | -0.7187 |
| C | 0.7130  | 15.1798 | 0.9336  |
| H | 0.7460  | 15.1563 | 2.0274  |
| H | 1.7447  | 15.2437 | 0.5733  |
| H | 0.2008  | 16.0993 | 0.6375  |
| H | -2.0371 | 11.3763 | 1.2335  |



**CH<sub>3</sub>CH<sub>2</sub> CH(CH<sub>2</sub>)<sub>12</sub>COOCH<sub>3</sub>**

|   |         |         |         |
|---|---------|---------|---------|
| C | 0.0219  | -0.1520 | -0.1413 |
| H | 0.0303  | -0.2121 | 0.9550  |
| H | 1.0736  | -0.1866 | -0.4546 |
| C | -0.7210 | -1.3648 | -0.7123 |
| H | -1.7694 | -1.3407 | -0.3985 |
| H | -0.7349 | -1.3110 | -1.8057 |
| C | -0.0960 | -2.6912 | -0.2806 |
| H | -0.0737 | -2.7797 | 0.8118  |
| H | 0.9505  | -2.7585 | -0.5986 |
| C | -0.8160 | -3.9085 | -0.8186 |
| O | -0.1947 | -5.0459 | -0.4288 |
| O | -1.8105 | -3.9019 | -1.5021 |
| C | -0.7909 | -6.2774 | -0.8755 |
| H | -1.8092 | -6.3695 | -0.4949 |
| H | -0.8121 | -6.3190 | -1.9655 |
| H | -0.1600 | -7.0678 | -0.4746 |
| C | -0.5868 | 1.1885  | -0.5681 |
| H | -0.5918 | 1.2502  | -1.6639 |
| H | -1.6391 | 1.2223  | -0.2581 |
| C | 0.1488  | 2.4052  | 0.0043  |
| H | 0.1512  | 2.3437  | 1.1004  |
| H | 1.2020  | 2.3690  | -0.3034 |
| C | -0.4560 | 3.7469  | -0.4245 |
| H | -0.4566 | 3.8094  | -1.5204 |
| H | -1.5097 | 3.7829  | -0.1186 |
| C | 0.2787  | 4.9632  | 0.1506  |
| H | 0.2780  | 4.9009  | 1.2466  |
| H | 1.3327  | 4.9260  | -0.1541 |
| C | -0.3235 | 6.3058  | -0.2789 |
| H | -0.3228 | 6.3684  | -1.3749 |
| H | -1.3775 | 6.3435  | 0.0259  |
| C | 0.4123  | 7.5210  | 0.2969  |
| H | 0.4122  | 7.4577  | 1.3928  |
| H | 1.4662  | 7.4834  | -0.0084 |
| C | -0.1893 | 8.8644  | -0.1308 |
| H | -1.2428 | 8.9022  | 0.1757  |
| H | -0.1902 | 8.9281  | -1.2268 |
| C | 0.5487  | 10.0770 | 0.4459  |
| H | 0.5530  | 10.0160 | 1.5408  |
| H | 1.6003  | 10.0441 | 0.1340  |
| C | -0.0569 | 11.4230 | 0.0224  |
| H | -1.1112 | 11.4670 | 0.3331  |
| H | -0.0898 | 11.4620 | -1.0828 |

|   |         |         |         |
|---|---------|---------|---------|
| C | 0.6701  | 12.6146 | 0.5507  |
| C | 0.0773  | 13.9835 | 0.4998  |
| H | -0.9642 | 13.9455 | 0.8502  |
| H | 0.0049  | 14.3214 | -0.5503 |
| C | 0.8567  | 15.0309 | 1.3036  |
| H | 0.8948  | 14.7629 | 2.3633  |
| H | 1.8869  | 15.1137 | 0.9441  |
| H | 0.3952  | 16.0186 | 1.2219  |
| H | 1.7309  | 12.5177 | 0.7710  |

**TS17-13**

|   |         |         |         |
|---|---------|---------|---------|
| C | 0.0314  | -0.1600 | -0.1658 |
| H | 0.0411  | -0.2239 | 0.9303  |
| H | 1.0826  | -0.1991 | -0.4806 |
| C | -0.7186 | -1.3669 | -0.7398 |
| H | -1.7673 | -1.3361 | -0.4273 |
| H | -0.7306 | -1.3116 | -1.8331 |
| C | -0.1033 | -2.6979 | -0.3086 |
| H | -0.0839 | -2.7882 | 0.7836  |
| H | 0.9435  | -2.7716 | -0.6244 |
| C | -0.8297 | -3.9099 | -0.8502 |
| O | -0.2206 | -5.0519 | -0.4546 |
| O | -1.8193 | -3.8958 | -1.5408 |
| C | -0.8236 | -6.2790 | -0.9044 |
| H | -1.8456 | -6.3620 | -0.5318 |
| H | -0.8364 | -6.3220 | -1.9944 |
| H | -0.2025 | -7.0740 | -0.4974 |
| C | -0.5712 | 1.1852  | -0.5864 |
| H | -0.5780 | 1.2514  | -1.6819 |
| H | -1.6227 | 1.2229  | -0.2742 |
| C | 0.1714  | 2.3959  | -0.0101 |
| H | 0.1813  | 2.3257  | 1.0855  |
| H | 1.2223  | 2.3599  | -0.3254 |
| C | -0.4342 | 3.7422  | -0.4232 |
| H | -0.4424 | 3.8147  | -1.5185 |
| H | -1.4856 | 3.7766  | -0.1095 |
| C | 0.3057  | 4.9521  | 0.1583  |
| H | 0.3197  | 4.8746  | 1.2533  |
| H | 1.3557  | 4.9219  | -0.1608 |
| C | -0.3061 | 6.2990  | -0.2434 |
| H | -0.3194 | 6.3788  | -1.3383 |
| H | -1.3562 | 6.3279  | 0.0753  |
| C | 0.4324  | 7.5076  | 0.3429  |
| H | 0.4525  | 7.4226  | 1.4371  |
| H | 1.4807  | 7.4838  | 0.0178  |
| C | -0.1870 | 8.8548  | -0.0459 |
| H | -1.2351 | 8.8774  | 0.2795  |
| H | -0.2071 | 8.9424  | -1.1401 |
| C | 0.5509  | 10.0607 | 0.5458  |
| H | 0.5747  | 9.9720  | 1.6385  |
| H | 1.5973  | 10.0443 | 0.2150  |
| C | -0.0759 | 11.4073 | 0.1642  |
| H | -1.1256 | 11.4293 | 0.4849  |
| H | -0.0985 | 11.4980 | -0.9330 |

|   |         |         |         |
|---|---------|---------|---------|
| C | 0.6476  | 12.6086 | 0.7371  |
| H | 0.5351  | 12.4876 | 2.0453  |
| H | 1.7336  | 12.5581 | 0.6088  |
| C | 0.0760  | 13.9753 | 0.4191  |
| H | -0.9716 | 14.0132 | 0.7423  |
| H | 0.0549  | 14.1027 | -0.6735 |
| C | 0.8567  | 15.1318 | 1.0511  |
| H | 0.8664  | 15.0507 | 2.1416  |
| H | 1.8961  | 15.1393 | 0.7087  |
| H | 0.4137  | 16.0968 | 0.7912  |
| H | 0.3835  | 12.4032 | 2.9975  |

**CH<sub>3</sub>CH(CH<sub>2</sub>)<sub>13</sub>COOCH<sub>3</sub>**

|   |         |         |         |
|---|---------|---------|---------|
| C | 0.0303  | -0.1671 | -0.1779 |
| H | 0.1079  | -0.2520 | 0.9140  |
| H | 1.0603  | -0.1909 | -0.5575 |
| C | -0.7440 | -1.3692 | -0.7292 |
| H | -1.7717 | -1.3544 | -0.3522 |
| H | -0.8239 | -1.2927 | -1.8182 |
| C | -0.0925 | -2.7028 | -0.3638 |
| H | -0.0104 | -2.8189 | 0.7228  |
| H | 0.9356  | -2.7562 | -0.7399 |
| C | -0.8330 | -3.9101 | -0.8967 |
| O | -0.2187 | -5.0557 | -0.5198 |
| O | -1.8351 | -3.8899 | -1.5688 |
| C | -0.8294 | -6.2787 | -0.9702 |
| H | -1.8469 | -6.3624 | -0.5857 |
| H | -0.8557 | -6.3145 | -2.0603 |
| H | -0.2048 | -7.0775 | -0.5762 |
| C | -0.6067 | 1.1807  | -0.5347 |
| H | -0.6829 | 1.2664  | -1.6262 |
| H | -1.6366 | 1.2050  | -0.1562 |
| C | 0.1634  | 2.3866  | 0.0151  |
| H | 0.2354  | 2.3024  | 1.1074  |
| H | 1.1949  | 2.3584  | -0.3596 |
| C | -0.4673 | 3.7361  | -0.3470 |
| H | -0.5367 | 3.8210  | -1.4392 |
| H | -1.4996 | 3.7646  | 0.0252  |
| C | 0.3024  | 4.9412  | 0.2053  |
| H | 0.3650  | 4.8602  | 1.2983  |
| H | 1.3369  | 4.9076  | -0.1606 |
| C | -0.3198 | 6.2920  | -0.1665 |
| H | -0.3789 | 6.3739  | -1.2596 |
| H | -1.3554 | 6.3258  | 0.1962  |
| C | 0.4494  | 7.4961  | 0.3889  |
| H | 0.5008  | 7.4189  | 1.4827  |
| H | 1.4874  | 7.4568  | 0.0334  |
| C | -0.1636 | 8.8480  | 0.0059  |
| H | -1.2026 | 8.8872  | 0.3580  |
| H | -0.2113 | 8.9261  | -1.0880 |
| C | 0.6046  | 10.0510 | 0.5647  |
| H | 0.6460  | 9.9762  | 1.6593  |
| H | 1.6456  | 10.0078 | 0.2186  |
| C | -0.0024 | 11.4022 | 0.1728  |
| H | -1.0430 | 11.4495 | 0.5157  |
| H | -0.0371 | 11.4810 | -0.9212 |

|   |         |         |         |
|---|---------|---------|---------|
| C | 0.7651  | 12.6062 | 0.7364  |
| H | 0.8035  | 12.5385 | 1.8341  |
| H | 1.8217  | 12.5330 | 0.4163  |
| C | 0.2064  | 13.9315 | 0.3379  |
| C | 0.6541  | 15.1916 | 0.9963  |
| H | 0.6453  | 15.1010 | 2.0900  |
| H | 1.6900  | 15.4553 | 0.7222  |
| H | 0.0257  | 16.0425 | 0.7220  |
| H | -0.3711 | 13.9950 | -0.5798 |

**TS17-14**

|   |         |         |         |
|---|---------|---------|---------|
| C | 0.0319  | -0.1649 | -0.1757 |
| H | 0.0822  | -0.2448 | 0.9181  |
| H | 1.0711  | -0.1912 | -0.5294 |
| C | -0.7297 | -1.3692 | -0.7401 |
| H | -1.7657 | -1.3529 | -0.3867 |
| H | -0.7847 | -1.2966 | -1.8310 |
| C | -0.0868 | -2.7013 | -0.3548 |
| H | -0.0249 | -2.8100 | 0.7341  |
| H | 0.9478  | -2.7592 | -0.7115 |
| C | -0.8210 | -3.9109 | -0.8910 |
| O | -0.2013 | -5.0544 | -0.5166 |
| O | -1.8237 | -3.8941 | -1.5624 |
| C | -0.8082 | -6.2794 | -0.9666 |
| H | -1.8237 | -6.3685 | -0.5778 |
| H | -0.8390 | -6.3136 | -2.0566 |
| H | -0.1783 | -7.0760 | -0.5765 |
| C | -0.5949 | 1.1816  | -0.5546 |
| H | -0.6396 | 1.2643  | -1.6480 |
| H | -1.6354 | 1.2064  | -0.2061 |
| C | 0.1583  | 2.3893  | 0.0144  |
| H | 0.1970  | 2.3083  | 1.1086  |
| H | 1.2008  | 2.3600  | -0.3286 |
| C | -0.4613 | 3.7375  | -0.3706 |
| H | -0.4932 | 3.8214  | -1.4646 |
| H | -1.5058 | 3.7650  | -0.0341 |
| C | 0.2872  | 4.9440  | 0.2072  |
| H | 0.3115  | 4.8636  | 1.3018  |
| H | 1.3340  | 4.9117  | -0.1220 |
| C | -0.3236 | 6.2937  | -0.1866 |
| H | -0.3412 | 6.3768  | -1.2811 |
| H | -1.3723 | 6.3246  | 0.1363  |
| C | 0.4207  | 7.4988  | 0.3995  |
| H | 0.4308  | 7.4195  | 1.4944  |
| H | 1.4716  | 7.4632  | 0.0836  |
| C | -0.1816 | 8.8495  | -0.0035 |
| H | -1.2336 | 8.8845  | 0.3079  |
| H | -0.1869 | 8.9308  | -1.0983 |
| C | 0.5600  | 10.0532 | 0.5887  |
| H | 0.5598  | 9.9746  | 1.6836  |
| H | 1.6136  | 10.0156 | 0.2821  |
| C | -0.0382 | 11.4036 | 0.1794  |
| H | -1.0901 | 11.4442 | 0.4866  |
| H | -0.0361 | 11.4845 | -0.9151 |

|   |         |         |         |
|---|---------|---------|---------|
| C | 0.7063  | 12.6051 | 0.7736  |
| H | 0.7160  | 12.5295 | 1.8689  |
| H | 1.7627  | 12.5653 | 0.4644  |
| C | 0.1336  | 13.9487 | 0.3717  |
| H | -1.0810 | 13.9764 | 0.8724  |
| H | -0.0789 | 14.0213 | -0.6987 |
| C | 0.8197  | 15.1770 | 0.9280  |
| H | 0.8907  | 15.1325 | 2.0191  |
| H | 1.8410  | 15.2655 | 0.5363  |
| H | 0.2845  | 16.0921 | 0.6613  |
| H | -1.9555 | 14.0096 | 1.2914  |



**CH<sub>2</sub> (CH<sub>2</sub>)<sub>14</sub>COOCH<sub>3</sub>**

|   |         |         |         |
|---|---------|---------|---------|
| C | 0.0405  | -0.1613 | -0.1788 |
| H | 0.0621  | -0.2225 | 0.9172  |
| H | 1.0876  | -0.2102 | -0.5056 |
| C | -0.7263 | -1.3633 | -0.7410 |
| H | -1.7714 | -1.3218 | -0.4177 |
| H | -0.7492 | -1.3116 | -1.8343 |
| C | -0.1188 | -2.6985 | -0.3116 |
| H | -0.0900 | -2.7861 | 0.7806  |
| H | 0.9242  | -2.7822 | -0.6371 |
| C | -0.8604 | -3.9055 | -0.8438 |
| O | -0.2634 | -5.0519 | -0.4424 |
| O | -1.8510 | -3.8845 | -1.5326 |
| C | -0.8803 | -6.2748 | -0.8846 |
| H | -1.9033 | -6.3439 | -0.5119 |
| H | -0.8933 | -6.3245 | -1.9744 |
| H | -0.2684 | -7.0743 | -0.4726 |
| C | -0.5559 | 1.1877  | -0.5959 |
| H | -0.5739 | 1.2518  | -1.6914 |
| H | -1.6037 | 1.2341  | -0.2725 |
| C | 0.2016  | 2.3940  | -0.0298 |
| H | 0.2246  | 2.3244  | 1.0656  |
| H | 1.2483  | 2.3513  | -0.3582 |
| C | -0.4012 | 3.7436  | -0.4361 |
| H | -0.4207 | 3.8168  | -1.5312 |
| H | -1.4492 | 3.7827  | -0.1114 |
| C | 0.3497  | 4.9500  | 0.1386  |
| H | 0.3774  | 4.8696  | 1.2332  |
| H | 1.3954  | 4.9180  | -0.1940 |
| C | -0.2644 | 6.2993  | -0.2516 |
| H | -0.2891 | 6.3835  | -1.3459 |
| H | -1.3113 | 6.3275  | 0.0778  |
| C | 0.4799  | 7.5056  | 0.3320  |
| H | 0.5142  | 7.4137  | 1.4254  |
| H | 1.5240  | 7.4856  | -0.0065 |
| C | -0.1472 | 8.8538  | -0.0406 |
| H | -1.1921 | 8.8706  | 0.2957  |
| H | -0.1794 | 8.9490  | -1.1338 |
| C | 0.5916  | 10.0599 | 0.5504  |
| H | 0.6319  | 9.9588  | 1.6427  |
| H | 1.6341  | 10.0504 | 0.2065  |
| C | -0.0466 | 11.4068 | 0.1922  |
| H | -1.0895 | 11.4139 | 0.5351  |
| H | -0.0859 | 11.5105 | -0.9001 |

|   |         |         |         |
|---|---------|---------|---------|
| C | 0.6889  | 12.6115 | 0.7882  |
| H | 0.7337  | 12.5108 | 1.8791  |
| H | 1.7289  | 12.6141 | 0.4381  |
| C | 0.0403  | 13.9595 | 0.4360  |
| H | -1.0010 | 13.9723 | 0.7840  |
| H | -0.0298 | 14.0346 | -0.6646 |
| C | 0.7674  | 15.1422 | 0.9751  |
| H | 1.8418  | 15.1136 | 1.1190  |
| H | 0.2663  | 16.0929 | 1.1116  |

**TS17-15**

|   |         |         |         |
|---|---------|---------|---------|
| C | 0.0363  | -0.1596 | -0.1744 |
| H | 0.0431  | -0.2140 | 0.9222  |
| H | 1.0876  | -0.2127 | -0.4868 |
| C | -0.7256 | -1.3634 | -0.7393 |
| H | -1.7749 | -1.3175 | -0.4307 |
| H | -0.7333 | -1.3187 | -1.8331 |
| C | -0.1271 | -2.6971 | -0.2929 |
| H | -0.1130 | -2.7770 | 0.8002  |
| H | 0.9199  | -2.7858 | -0.6039 |
| C | -0.8653 | -3.9059 | -0.8255 |
| O | -0.2697 | -5.0509 | -0.4182 |
| O | -1.8529 | -3.8872 | -1.5188 |
| C | -0.8847 | -6.2753 | -0.8588 |
| H | -1.9089 | -6.3437 | -0.4891 |
| H | -0.8942 | -6.3282 | -1.9484 |
| H | -0.2739 | -7.0734 | -0.4423 |
| C | -0.5513 | 1.1882  | -0.6077 |
| H | -0.5553 | 1.2455  | -1.7037 |
| H | -1.6030 | 1.2392  | -0.2979 |
| C | 0.2020  | 2.3960  | -0.0394 |
| H | 0.2131  | 2.3317  | 1.0565  |
| H | 1.2522  | 2.3499  | -0.3562 |
| C | -0.3941 | 3.7448  | -0.4581 |
| H | -0.4030 | 3.8128  | -1.5537 |
| H | -1.4449 | 3.7877  | -0.1435 |
| C | 0.3542  | 4.9522  | 0.1181  |
| H | 0.3755  | 4.8742  | 1.2130  |
| H | 1.4018  | 4.9186  | -0.2083 |
| C | -0.2568 | 6.3011  | -0.2781 |
| H | -0.2767 | 6.3832  | -1.3726 |
| H | -1.3050 | 6.3311  | 0.0470  |
| C | 0.4865  | 7.5075  | 0.3067  |
| H | 0.5214  | 7.4142  | 1.3999  |
| H | 1.5305  | 7.4890  | -0.0323 |
| C | -0.1421 | 8.8559  | -0.0630 |
| H | -1.1863 | 8.8713  | 0.2754  |
| H | -0.1764 | 8.9529  | -1.1560 |
| C | 0.5973  | 10.0610 | 0.5292  |
| H | 0.6445  | 9.9546  | 1.6207  |
| H | 1.6376  | 10.0558 | 0.1789  |
| C | -0.0467 | 11.4082 | 0.1825  |
| H | -1.0870 | 11.4111 | 0.5328  |
| H | -0.0937 | 11.5179 | -0.9089 |

|   |         |         |         |
|---|---------|---------|---------|
| C | 0.6901  | 12.6109 | 0.7813  |
| H | 0.7435  | 12.5000 | 1.8710  |
| H | 1.7278  | 12.6178 | 0.4237  |
| C | 0.0354  | 13.9570 | 0.4458  |
| H | -1.0041 | 13.9595 | 0.7964  |
| H | -0.0219 | 14.0666 | -0.6482 |
| C | 0.7641  | 15.1486 | 1.0183  |
| H | 0.6703  | 15.0601 | 2.3786  |
| H | 1.8440  | 15.1633 | 0.8671  |
| H | 0.3064  | 16.1205 | 0.8359  |
| H | 0.5738  | 14.9856 | 3.2969  |

**CH<sub>3</sub>(CH<sub>2</sub>)<sub>14</sub>COOCH<sub>2</sub>**

|   |          |         |         |
|---|----------|---------|---------|
| C | -4.3660  | -2.4879 | -0.0501 |
| H | -4.9467  | -1.5608 | -0.1428 |
| H | -3.6194  | -2.4600 | -0.8546 |
| C | -3.6536  | -2.5097 | 1.3066  |
| H | -4.3922  | -2.5258 | 2.1144  |
| H | -3.0767  | -3.4344 | 1.4089  |
| C | -2.7232  | -1.3120 | 1.4984  |
| H | -3.2713  | -0.3664 | 1.4133  |
| H | -1.9582  | -1.2751 | 0.7140  |
| C | -2.0124  | -1.3078 | 2.8286  |
| O | -1.1940  | -0.2028 | 2.9271  |
| O | -2.1092  | -2.1216 | 3.7076  |
| C | -0.4667  | -0.0250 | 4.0667  |
| C | -5.2934  | -3.6890 | -0.2661 |
| H | -6.0362  | -3.7222 | 0.5412  |
| H | -4.7104  | -4.6148 | -0.1797 |
| C | -6.0150  | -3.6698 | -1.6183 |
| H | -6.6126  | -2.7522 | -1.6964 |
| H | -5.2714  | -3.6167 | -2.4242 |
| C | -6.9203  | -4.8851 | -1.8490 |
| H | -6.3190  | -5.8009 | -1.7811 |
| H | -7.6583  | -4.9465 | -1.0387 |
| C | -7.6501  | -4.8591 | -3.1968 |
| H | -8.2704  | -3.9552 | -3.2546 |
| H | -6.9125  | -4.7723 | -4.0053 |
| C | -8.5266  | -6.0917 | -3.4464 |
| H | -7.9021  | -6.9934 | -3.4011 |
| H | -9.2571  | -6.1883 | -2.6326 |
| C | -9.2667  | -6.0572 | -4.7884 |
| H | -9.9092  | -5.1678 | -4.8238 |
| H | -8.5374  | -5.9361 | -5.6001 |
| C | -10.1149 | -7.3055 | -5.0564 |
| H | -9.4686  | -8.1926 | -5.0328 |
| H | -10.8371 | -7.4354 | -4.2398 |
| C | -10.8655 | -7.2633 | -6.3923 |
| H | -11.5250 | -6.3858 | -6.4086 |
| H | -10.1448 | -7.1153 | -7.2072 |
| C | -11.6925 | -8.5228 | -6.6740 |
| H | -11.0305 | -9.3985 | -6.6661 |
| H | -12.4080 | -8.6768 | -5.8557 |
| C | -12.4509 | -8.4759 | -8.0051 |
| H | -13.1206 | -7.6059 | -8.0101 |
| H | -11.7372 | -8.3128 | -8.8234 |

|   |          |          |          |
|---|----------|----------|----------|
| C | -13.2670 | -9.7408  | -8.2948  |
| H | -12.5974 | -10.6096 | -8.2938  |
| H | -13.9788 | -9.9060  | -7.4767  |
| C | -14.0240 | -9.6827  | -9.6248  |
| H | -14.5946 | -10.5989 | -9.8010  |
| H | -14.7280 | -8.8446  | -9.6429  |
| H | -13.3359 | -9.5532  | -10.4663 |
| H | 0.1500   | 0.8573   | 4.0607   |
| H | -0.5438  | -0.7539  | 4.8568   |

**TS17-16**

|   |          |         |         |
|---|----------|---------|---------|
| C | -4.3753  | -2.4758 | -0.0533 |
| H | -4.9820  | -1.5632 | -0.1210 |
| H | -3.6382  | -2.4108 | -0.8644 |
| C | -3.6500  | -2.5044 | 1.2964  |
| H | -4.3795  | -2.5460 | 2.1109  |
| H | -3.0551  | -3.4201 | 1.3787  |
| C | -2.7400  | -1.2924 | 1.4970  |
| H | -3.3066  | -0.3572 | 1.4115  |
| H | -1.9694  | -1.2369 | 0.7205  |
| C | -2.0489  | -1.2689 | 2.8388  |
| O | -1.1470  | -0.2381 | 2.8927  |
| O | -2.2318  | -2.0235 | 3.7571  |
| C | -0.4552  | -0.0458 | 4.0932  |
| H | -0.2675  | -0.9634 | 4.6461  |
| H | 0.4097   | 0.5834  | 3.9046  |
| H | -1.2175  | 0.6709  | 4.9065  |
| H | -1.7898  | 1.1995  | 5.4700  |
| C | -5.2716  | -3.6974 | -0.2852 |
| H | -5.9983  | -3.7736 | 0.5336  |
| H | -4.6607  | -4.6077 | -0.2340 |
| C | -6.0183  | -3.6632 | -1.6234 |
| H | -6.6474  | -2.7644 | -1.6633 |
| H | -5.2922  | -3.5613 | -2.4406 |
| C | -6.8871  | -4.9009 | -1.8741 |
| H | -6.2535  | -5.7970 | -1.8509 |
| H | -7.6026  | -5.0146 | -1.0494 |
| C | -7.6504  | -4.8562 | -3.2026 |
| H | -8.3015  | -3.9724 | -3.2154 |
| H | -6.9367  | -4.7183 | -4.0254 |
| C | -8.4921  | -6.1088 | -3.4714 |
| H | -7.8374  | -6.9900 | -3.4716 |
| H | -9.1975  | -6.2560 | -2.6432 |
| C | -9.2681  | -6.0561 | -4.7923 |
| H | -9.9357  | -5.1847 | -4.7846 |
| H | -8.5643  | -5.8909 | -5.6186 |
| C | -10.0888 | -7.3196 | -5.0748 |
| H | -9.4188  | -8.1890 | -5.0910 |
| H | -10.7869 | -7.4909 | -4.2451 |
| C | -10.8729 | -7.2621 | -6.3907 |
| H | -11.5512 | -6.3993 | -6.3699 |
| H | -10.1761 | -7.0795 | -7.2191 |
| C | -11.6802 | -8.5324 | -6.6819 |
| H | -11.0005 | -9.3941 | -6.7075 |

|   |          |          |          |
|---|----------|----------|----------|
| H | -12.3739 | -8.7185  | -5.8516  |
| C | -12.4690 | -8.4730  | -7.9948  |
| H | -13.1535 | -7.6150  | -7.9678  |
| H | -11.7768 | -8.2817  | -8.8253  |
| C | -13.2696 | -9.7462  | -8.2910  |
| H | -12.5857 | -10.6032 | -8.3206  |
| H | -13.9608 | -9.9386  | -7.4613  |
| C | -14.0560 | -9.6765  | -9.6034  |
| H | -14.6151 | -10.5989 | -9.7845  |
| H | -14.7740 | -8.8503  | -9.5909  |
| H | -13.3884 | -9.5202  | -10.4568 |
